# Supplementary material for: A meta-analysis of genome-wide association studies of epigenetic age acceleration
Source: PLoS Genet. 2019 Nov 18;15(11):e1008104. doi: 10.1371/journal.pgen.1008104 (PMC6886870; doi:10.1371/journal.pgen.1008104)
Supplement: S4 Table — (XLSX) [file pgen.1008104.s005.xlsx]

## Sheet: S4 Table
S4 Table: Estimated polygenicity and SNP-based heritability using LD score regression
Output from univariate LD score regression using summary statistics from the genome-wide association analyses of Horvath-EAA and Hannum-EAA in GS and in the Lu sample, and the meta-analysis of GS and Lu
Variable	h2SNP(SE)	λGC	μχ2	Intercept (SE)	Ratio (SE)	Heritability Z-score
Horvath-EAAGS	0.1833 (0.0987)	1.0165	1.0202	1.0015 (0.0066)	0.074 (0.3267)	1.857
Hannum-EAAGS	0.1989 (0.0823)	1.0225	1.0184	0.9984 (0.0062)	< 0	2.417
Horvath-EAALu	0.1905 (0.062)	1.0315	1.0364	1.0043 (0.0069)	0.1188 (0.1898)	3.073
Hannum-EAALu	0.1888 (0.0636)	1.0375	1.0432	1.0114 (0.0069)	0.2644 (0.1597)	2.969
Horvath-EAAMeta-analysis	0.1541 (0.0418)	1.0345	1.0485	1.0061 (0.0076)	0.1256 (0.1564)	3.686
Hannum-EAAMeta-analysis	0.194 (0.0395)	1.0436	1.054	1.0015 (0.0069)	0.0273 (0.1273)	4.911
h2SNP(SE) is the SNP-based heritability (on the observed scale) and its standard error
λGC is estimated by median(χ2)/0.4549 and is an indication of genomic control
μχ2 is the mean Chi-squared statistic
Intercept (SE) denotes the LD score regression intercept with its standard error
Ratio (SE) is estimated by (Intercept-1)/(μχ2-1) and indicates the proportion of inflation in mean χ2 ascribed to causes other than polygenic heritability
Heritability Z-score is the heritability divided by its standard error; it is recommended that subsequent genetic correlation analysis should be restricted to GWAS with a heritability Z-score of at least four on the grounds of interpretability and power.
