# Supplementary material for: A meta-analysis of genome-wide association studies of epigenetic age acceleration
Source: PLoS Genet. 2019 Nov 18;15(11):e1008104. doi: 10.1371/journal.pgen.1008104 (PMC6886870; doi:10.1371/journal.pgen.1008104)
Supplement: S11 Table — (XLSX) [file pgen.1008104.s012.xlsx]

## Sheet: S11 Table
S11 Table: Functional annotation of all SNPs in LD (r2 >= 0.6) with FUMA-identified independent significant SNPs for Hannum-EAA
Independent significant SNPs (IndSigSNP) were selected based on their having a genome-wide significant P-value (P < 5 x 10-8) and being independent from each other (r2 < 0.6) within a 250kb window.
Chromosome (Chr) and position (bp, in Mb) are given with regards to the hg19 assembly.
A1 and A2 refer to the reference allele and non-reference allele for the SNP, respectively. Beta and se columns pertain to A1.
MAF is the minor allele frequency computed based on 1000G.
r2 is the maximum r2 of the given SNP with one of the independent significant SNPs.
nearestGene was determined by FUMA based on ANNOVAR annotations, and distance denotes the distance in base pairs from the given SNP to this gene.
Function is the functional consequence of the SNP on the gene obtained from ANNOVAR.
The CADD score was computed in FUMA, based on 63 annotations. A higher score indicates a more deleterious SNP, with a threshold of 12.37 suggested by Kicher et al. (2014) for a SNP to be considered deleterious.
RDB is the RegulomeDB score, a categorical score from 1a to 7 representing regulatory functionality of SNPs based on eQTLs and chromatin marks. 1a is the highest score, indicating that the SNP has the most biological evidence to be a regulatory element.
The chromatin state represents accessibility of genomic regions (every 200bp) with 15 categorical states predicted by ChromHMM based on 5 chromatin marks for 127 epigenomes.
minChrState and commonChrState are the minimum and most common 15-core chromatin state across 127 tissue/cell types.
SNP	Chr	bp	A1	A2	MAF	P-value	beta	se	r2	IndSigSNP	GenomicLocus	nearestGene	distance	function	CADD	RDB	minChrState	commonChrState
rs2505705	10	37824697	T	C	0.1441	2.051e-05	-0.3916	0.0919	0.607189	rs2472160	1	TACC1P1	0	ncRNA_intronic	2.406	NA	7	15
rs2505702	10	37826492	T	C	0.1441	1.97e-05	-0.3923	0.0919	0.607189	rs2472160	1	TACC1P1	0	ncRNA_intronic	1.677	7	8	15
rs2505701	10	37833395	T	C	0.1441	1.856e-05	-0.3942	0.0921	0.607189	rs2472160	1	TACC1P1	0	ncRNA_intronic	0.361	NA	9	15
rs1980650	10	37836117	T	C	0.1441	2.284e-05	0.3906	0.0922	0.607189	rs2472160	1	TACC1P1	2488	intergenic	1.76	5	9	15
rs2474874	10	37845308	A	G	0.1461	6.794e-06	-0.4156	0.0924	0.606068	rs2472160	1	TACC1P1	11679	intergenic	1.737	6	9	15
rs10740940	10	37847043	A	G	0.4304	4.774e-06	-0.2958	0.0647	0.719281	rs289638	1	TACC1P1	13414	intergenic	0.214	7	9	15
rs139749988	10	37847824	G	GTA	0.2803	NA	NA	NA	0.907841	rs1535273	1	TACC1P1	14195	intergenic	NA	NA	9	15
rs1535272	10	37847916	A	T	0.2614	7.015e-10	-0.4573	0.0742	1	rs1535273	1	TACC1P1	14287	intergenic	4.199	7	9	15
rs1535273	10	37848049	A	G	0.2614	2.117e-10	-0.4704	0.0741	1	rs1535273	1	TACC1P1	14420	intergenic	3.103	7	9	15
rs4245000	10	37848591	A	T	0.4254	1.106e-06	-0.3126	0.0642	0.74113	rs289638	1	TACC1P1	14962	intergenic	4.261	6	9	15
rs1884926	10	37849007	C	G	0.2614	3.229e-10	-0.4658	0.0741	1	rs1535273	1	TACC1P1	15378	intergenic	0.151	6	9	15
rs6482043	10	37851315	A	G	0.3618	0.0005614	0.2314	0.0671	0.609046	rs1535273	1	TACC1P1	17686	intergenic	0.861	6	7	15
rs6482044	10	37852387	A	G	0.3618	0.0005203	0.2331	0.0672	0.609046	rs1535273	1	TACC1P1	18758	intergenic	0.621	6	7	15
rs2224370	10	37853681	A	G	0.3628	0.0005775	-0.231	0.0671	0.606396	rs1535273	1	TACC1P1	20052	intergenic	1.229	6	9	15
rs2384718	10	37853776	T	G	0.4245	1.015e-06	-0.3134	0.0641	0.745875	rs289638	1	TACC1P1	20147	intergenic	4.179	6	9	15
rs2145300	10	37854267	T	C	0.3618	0.0005767	0.2309	0.0671	0.609046	rs1535273	1	TACC1P1	20638	intergenic	0.099	6	9	15
rs1884927	10	37854486	A	G	0.3618	0.0003472	-0.2405	0.0672	0.609046	rs1535273	1	TACC1P1	20857	intergenic	1.613	7	9	15
rs4934588	10	37855396	T	C	0.3628	0.0005469	0.2318	0.0671	0.606396	rs1535273	1	TACC1P1	21767	intergenic	NA	5	9	15
rs10764134	10	37856660	T	C	0.4254	1.072e-06	0.3128	0.0641	0.74113	rs289638	1	TACC1P1	23031	intergenic	2.025	6	9	15
rs2145301	10	37856952	A	G	0.2455	1.485e-08	0.4259	0.0752	0.920352	rs1535273	1	TACC1P1	23323	intergenic	0.655	6	9	15
rs2145303	10	37857312	A	C	0.3628	0.0005363	-0.2321	0.0671	0.606396	rs1535273	1	TACC1P1	23683	intergenic	8.19	7	9	15
rs35143159	10	37857616	A	AT	0.4364	NA	NA	NA	0.689195	rs289638	1	TACC1P1	23987	intergenic	NA	NA	9	15
rs1117066	10	37858647	G	A	0.3628	NA	NA	NA	0.606396	rs1535273	1	TACC1P1	25018	intergenic	0.43	6	9	15
rs34844462	10	37858654	AT	A	0.3628	NA	NA	NA	0.606396	rs1535273	1	TACC1P1	25025	intergenic	1.699	NA	9	15
rs4631828	10	37858711	C	T	0.3628	NA	NA	NA	0.606396	rs1535273	1	TACC1P1	25082	intergenic	0.951	6	9	15
rs137995522	10	37858724	C	CTATT	0.4225	NA	NA	NA	0.747683	rs289638	1	TACC1P1	25095	intergenic	2.167	NA	9	15
rs976039	10	37860129	T	C	0.3628	0.0005289	0.2323	0.067	0.606396	rs1535273	1	TACC1P1	26500	intergenic	2.159	6	9	15
rs976040	10	37860193	A	G	0.3628	0.0005302	-0.2322	0.067	0.606396	rs1535273	1	TACC1P1	26564	intergenic	1.664	6	9	15
rs2180704	10	37862124	T	G	0.3628	0.0005289	-0.2323	0.067	0.606396	rs1535273	1	MTND1P18	27600	intergenic	0.528	6	9	15
rs1998160	10	37864993	A	C	0.2624	3.055e-10	0.4657	0.074	0.994848	rs1535273	1	MTND1P18	24731	intergenic	2.366	7	9	15
rs1555446	10	37865248	A	T	0.3628	0.0005578	-0.2314	0.0671	0.606396	rs1535273	1	MTND1P18	24476	intergenic	6.827	5	9	15
rs1998161	10	37865386	T	G	0.3628	0.0005328	-0.2322	0.067	0.606396	rs1535273	1	MTND1P18	24338	intergenic	7.13	6	9	15
rs5784558	10	37865413	G	GT	0.2465	NA	NA	NA	0.914988	rs1535273	1	MTND1P18	24311	intergenic	8.345	NA	9	15
rs3886469	10	37866549	A	G	0.3628	0.0003875	0.2386	0.0672	0.606396	rs1535273	1	MTND1P18	23175	intergenic	0.357	NA	9	15
rs10764135	10	37866845	T	C	0.4235	1.045e-06	-0.3126	0.064	0.74992	rs289638	1	MTND1P18	22879	intergenic	6.396	5	9	15
rs10740941	10	37868805	A	C	0.2455	1.576e-08	0.4269	0.0755	0.920352	rs1535273	1	MTND1P18	20919	intergenic	9.154	7	9	15
rs12255038	10	37869332	T	C	0.4245	1.239e-06	0.3105	0.064	0.745875	rs289638	1	MTND1P18	20392	intergenic	2.91	5	9	15
rs7915670	10	37870212	T	C	0.4274	8.56e-07	0.3149	0.064	0.73326	rs289638	1	MTND1P18	19512	intergenic	4.769	6	9	15
rs7920417	10	37871493	A	T	0.3618	0.0006086	-0.2302	0.0671	0.609046	rs1535273	1	MTND1P18	18231	intergenic	5.027	5	9	15
rs7908251	10	37872271	A	G	0.2624	2.241e-10	-0.4689	0.0739	0.994848	rs1535273	1	MTND1P18	17453	intergenic	3.527	6	9	15
rs7908073	10	37872359	T	C	0.3628	0.0004993	-0.2331	0.067	0.606396	rs1535273	1	MTND1P18	17365	intergenic	4.824	7	9	15
rs6482046	10	37872566	T	C	0.3628	0.0005063	0.233	0.067	0.606396	rs1535273	1	MTND1P18	17158	intergenic	0.091	6	9	15
rs10718865	10	37872762	C	CA	0.4235	NA	NA	NA	0.74992	rs289638	1	MTND1P18	16961	intergenic	9.162	NA	9	15
rs10827800	10	37873278	T	G	0.3628	0.0005101	-0.2328	0.067	0.606396	rs1535273	1	MTND1P18	16446	intergenic	0.022	5	9	15
rs10734025	10	37873487	A	G	0.3628	0.0005017	0.233	0.067	0.606396	rs1535273	1	MTND1P18	16237	intergenic	0.125	7	9	15
rs9418273	10	37873644	A	G	0.2465	1.201e-08	-0.4278	0.0751	0.914988	rs1535273	1	MTND1P18	16080	intergenic	1.73	5	9	15
rs9417253	10	37873732	A	G	0.3628	0.0005005	-0.2331	0.067	0.606396	rs1535273	1	MTND1P18	15992	intergenic	3.044	5	9	15
rs7917262	10	37874602	A	C	0.4235	1.137e-06	0.311	0.0639	0.74992	rs289638	1	MTND1P18	15122	intergenic	0.285	5	9	15
rs2474877	10	37874932	T	C	0.175	7.766e-08	-0.5021	0.0935	0.835876	rs2472160	1	MTND1P18	14792	intergenic	6.286	5	9	15
rs17607056	10	37874947	A	G	0.175	6.67e-08	-0.51	0.0945	0.835876	rs2472160	1	MTND1P18	14777	intergenic	8.028	5	9	15
rs17607063	10	37874977	G	T	0.1571	NA	NA	NA	0.722591	rs2472160	1	MTND1P18	14747	intergenic	10.75	5	9	15
rs17607070	10	37874987	T	C	0.1581	NA	NA	NA	0.716346	rs2472160	1	MTND1P18	14737	intergenic	9.052	5	9	15
rs17591249	10	37874996	C	T	0.1571	NA	NA	NA	0.722591	rs2472160	1	MTND1P18	14728	intergenic	7.602	5	9	15
rs17591256	10	37874998	C	A	0.1571	NA	NA	NA	0.722591	rs2472160	1	MTND1P18	14726	intergenic	1.695	5	9	15
rs17591263	10	37875022	G	A	0.175	NA	NA	NA	0.835876	rs2472160	1	MTND1P18	14702	intergenic	0.77	5	9	15
rs4934872	10	37875245	A	G	0.175	5.872e-09	0.5117	0.0879	0.835876	rs2472160	1	MTND1P18	14479	intergenic	3.16	6	9	15
rs977637	10	37875687	A	G	0.3628	0.0009208	-0.2226	0.0672	0.606396	rs1535273	1	MTND1P18	14037	intergenic	0.168	7	9	15
rs374949403	10	37875770	C	CAA	0.3131	NA	NA	NA	0.759283	rs1535273	1	MTND1P18	13954	intergenic	3.836	NA	9	15
rs7918776	10	37876190	A	T	0.3638	0.0005109	-0.2326	0.0669	0.603757	rs1535273	1	MTND1P18	13534	intergenic	7.484	7	9	15
rs1321963	10	37876238	A	T	0.2465	1.241e-08	-0.4272	0.075	0.914988	rs1535273	1	MTND1P18	13486	intergenic	6.245	5	9	15
rs1853174	10	37876431	T	C	0.3628	0.0005109	-0.2326	0.0669	0.606396	rs1535273	1	MTND1P18	13293	intergenic	2.799	7	9	15
rs1884928	10	37876702	T	C	0.3628	NA	NA	NA	0.606396	rs1535273	1	MTND1P18	13022	intergenic	6.521	6	9	15
rs4245001	10	37877332	A	G	0.2396	1.209e-08	0.432	0.0758	0.871481	rs1535273	1	MTND1P18	12392	intergenic	3.77	7	9	15
rs2038558	10	37877402	A	G	0.3628	0.0005122	-0.2326	0.0669	0.606396	rs1535273	1	MTND1P18	12322	intergenic	3.437	7	9	15
rs2224371	10	37879010	A	G	0.2396	1.209e-08	0.432	0.0758	0.871481	rs1535273	1	MTND1P18	10714	intergenic	0.906	6	9	15
rs4141861	10	37880854	A	T	0.2465	1.262e-08	-0.4268	0.075	0.914988	rs1535273	1	MTND1P18	8870	intergenic	8.396	5	9	15
rs9733309	10	37882405	A	G	0.4235	1.123e-06	-0.3108	0.0638	0.74992	rs289638	1	MTND1P18	7319	intergenic	0.285	7	9	15
rs10656348	10	37882636	C	CTG	0.3628	NA	NA	NA	0.606396	rs1535273	1	MTND1P18	7088	intergenic	1.878	NA	9	15
rs2384719	10	37883149	T	C	0.3628	0.000525	0.2321	0.0669	0.606396	rs1535273	1	MTND1P18	6575	intergenic	2.512	6	9	15
rs2208319	10	37883340	T	C	0.3628	0.0005276	-0.232	0.0669	0.606396	rs1535273	1	MTND1P18	6384	intergenic	2.052	6	9	15
rs2224372	10	37883669	T	G	0.3628	0.0005826	0.2304	0.067	0.606396	rs1535273	1	MTND1P18	6055	intergenic	8.055	5	7	15
rs7081464	10	37883937	T	C	0.4235	1.411e-06	-0.3078	0.0638	0.74992	rs289638	1	MTND1P18	5787	intergenic	7.845	7	7	15
rs35392950	10	37884021	AT	A	0.3628	NA	NA	NA	0.606396	rs1535273	1	MTND1P18	5702	intergenic	NA	NA	7	15
rs10827802	10	37885395	A	G	0.3628	0.0005303	-0.2319	0.0669	0.606396	rs1535273	1	MTND1P18	4329	intergenic	2.845	6	8	15
rs2145305	10	37886949	T	C	0.175	1.607e-08	0.4956	0.0877	0.835876	rs2472160	1	MTND1P18	2775	intergenic	2.918	7	8	15
rs2145306	10	37887082	T	C	0.3618	0.0005838	-0.2302	0.0669	0.609046	rs1535273	1	MTND1P18	2642	intergenic	0.095	7	9	15
rs2180705	10	37887267	A	G	0.2624	2.762e-10	0.4655	0.0738	0.994848	rs1535273	1	MTND1P18	2457	intergenic	3.065	7	9	15
rs1570048	10	37887445	T	C	0.3628	0.0005838	0.2302	0.0669	0.606396	rs1535273	1	MTND1P18	2279	intergenic	0.718	7	9	15
rs1998162	10	37887464	A	T	0.175	NA	NA	NA	0.835876	rs2472160	1	MTND1P18	2260	intergenic	6.572	6	9	15
rs1570049	10	37887536	A	G	0.3628	0.0005838	0.2302	0.0669	0.606396	rs1535273	1	MTND1P18	2188	intergenic	5.963	7	9	15
rs1570050	10	37888130	T	G	0.3628	0.000529	-0.232	0.0669	0.606396	rs1535273	1	MTND1P18	1594	intergenic	4.118	7	9	15
rs2384720	10	37889070	T	C	0.3628	0.0005351	-0.2319	0.067	0.606396	rs1535273	1	MTND1P18	0	downstream	2.7	6	9	15
rs10827803	10	37889762	A	C	0.3628	0.0005329	0.2318	0.0669	0.606396	rs1535273	1	MTND1P18	0	ncRNA_exonic	5.081	6	9	15
rs10740942	10	37890024	T	C	0.3628	0.0005444	-0.2316	0.067	0.606396	rs1535273	1	MTND1P18	0	ncRNA_exonic	7.404	6	9	15
rs11011277	10	37890582	A	T	0.3628	NA	NA	NA	0.606396	rs1535273	1	MTRNR2L7	0	UTR3	7.915	5	9	15
rs2180706	10	37890955	G	A	0.3628	NA	NA	NA	0.606396	rs1535273	1	MTRNR2L7	0	exonic	9.587	6	9	15
rs2224373	10	37891576	A	G	0.3628	0.0005263	-0.2321	0.0669	0.606396	rs1535273	1	MTRNR2L7	0	UTR5	11.57	5	9	15
rs111990925	10	37892370	A	ACTAT	0.174	NA	NA	NA	0.817794	rs2472160	1	MTRNR2L7	0	upstream	NA	NA	8	15
rs56370168	10	37892378	G	A	0.3628	NA	NA	NA	0.606396	rs1535273	1	MTRNR2L7	0	upstream	1.949	7	8	15
rs72789830	10	37892417	A	G	0.175	9.139e-09	-0.5091	0.0886	0.835876	rs2472160	1	MTRNR2L7	0	upstream	3.556	7	9	15
rs10764136	10	37892541	A	G	0.175	5.701e-09	-0.5121	0.0879	0.835876	rs2472160	1	MTRNR2L7	0	upstream	1.535	7	9	15
rs10740943	10	37892872	A	C	0.3628	0.0005489	0.2313	0.0669	0.606396	rs1535273	1	MTRNR2L7	1013	intergenic	0.424	7	9	15
rs10740944	10	37892944	A	C	0.3628	0.0005289	0.232	0.0669	0.606396	rs1535273	1	MTRNR2L7	1085	intergenic	0.48	7	9	15
rs4141862	10	37893823	C	G	0.3628	0.0005289	-0.232	0.0669	0.606396	rs1535273	1	MTRNR2L7	1964	intergenic	NA	6	9	15
rs10740945	10	37894176	A	T	0.2624	2.208e-10	0.4683	0.0738	0.994848	rs1535273	1	MTRNR2L7	2317	intergenic	NA	6	9	15
rs11353238	10	37894558	CA	C	0.3628	NA	NA	NA	0.606396	rs1535273	1	MTRNR2L7	2699	intergenic	12.73	NA	9	15
rs7083432	10	37894686	G	A	0.3628	NA	NA	NA	0.606396	rs1535273	1	MTRNR2L7	2827	intergenic	1.936	7	9	15
rs7101261	10	37894935	T	A	0.2465	NA	NA	NA	0.914988	rs1535273	1	MTRNR2L7	3076	intergenic	1.155	7	9	15
rs11011281	10	37895028	G	A	0.4235	NA	NA	NA	0.74992	rs289638	1	MTRNR2L7	3169	intergenic	0.233	6	9	15
rs12217416	10	37897099	C	T	0.2624	NA	NA	NA	0.994848	rs1535273	1	MTRNR2L7	5240	intergenic	1.422	7	9	15
rs71007649	10	37897449	TA	T	0.175	NA	NA	NA	0.835876	rs2472160	1	MTRNR2L7	5590	intergenic	NA	NA	9	15
rs56094015	10	37897723	T	A	0.4245	NA	NA	NA	0.745875	rs289638	1	MTRNR2L7	5864	intergenic	0.816	6	9	15
rs7097797	10	37897960	A	C	0.3618	0.0004975	-0.233	0.0669	0.609046	rs1535273	1	MTRNR2L7	6101	intergenic	1.728	6	9	15
rs7082477	10	37898267	T	C	0.3618	0.0005216	0.2321	0.0669	0.609046	rs1535273	1	MTRNR2L7	6408	intergenic	2.537	6	9	15
rs4934878	10	37899129	A	G	0.174	1.742e-08	0.4945	0.0877	0.829963	rs2472160	1	MTRNR2L7	7270	intergenic	2.944	7	9	15
rs4934879	10	37899173	A	G	0.3618	0.0005255	-0.232	0.0669	0.609046	rs1535273	1	MTRNR2L7	7314	intergenic	6.119	6	9	15
rs4934880	10	37899287	A	C	0.3618	0.0005268	0.232	0.0669	0.609046	rs1535273	1	MTRNR2L7	7428	intergenic	0.284	7	9	15
rs994804	10	37900140	A	C	0.4245	1.786e-06	0.3051	0.0639	0.745875	rs289638	1	MTRNR2L7	8281	intergenic	0.098	6	9	15
rs2208321	10	37901417	A	G	0.3628	0.0005268	-0.232	0.0669	0.606396	rs1535273	1	MTRNR2L7	9558	intergenic	2.649	7	9	15
rs7100924	10	37901902	T	G	0.3618	0.0005268	0.232	0.0669	0.609046	rs1535273	1	MTRNR2L7	10043	intergenic	0.745	6	9	15
rs2384721	10	37903525	T	A	0.2475	NA	NA	NA	0.909661	rs1535273	1	MTRNR2L7	11666	intergenic	2.942	6	9	15
rs7915998	10	37903721	T	C	0.3628	0.000536	-0.2316	0.0669	0.606396	rs1535273	1	MTRNR2L7	11862	intergenic	4.652	7	9	15
rs6482047	10	37903917	A	G	0.3628	0.000536	0.2316	0.0669	0.606396	rs1535273	1	MTRNR2L7	12058	intergenic	1.392	6	9	15
rs995141	10	37905302	A	G	0.3618	0.0005229	0.2321	0.0669	0.609046	rs1535273	1	MTRNR2L7	13443	intergenic	9.657	5	8	15
rs10740947	10	37906970	A	G	0.3618	0.00054	-0.2315	0.0669	0.609046	rs1535273	1	MTRNR2L7	15111	intergenic	3.784	5	9	9
rs7070262	10	37907695	T	C	0.3618	0.0004216	0.2371	0.0672	0.609046	rs1535273	1	MTRNR2L7	15836	intergenic	0.128	7	9	15
rs10734026	10	37908416	T	C	0.2465	1.307e-08	-0.4265	0.075	0.914988	rs1535273	1	MTRNR2L7	16557	intergenic	3.997	5	7	9
rs10764138	10	37908617	A	G	0.3618	0.0006072	-0.2295	0.0669	0.609046	rs1535273	1	MTRNR2L7	16758	intergenic	1.909	5	7	9
rs10508859	10	37908884	A	G	0.174	1.792e-08	0.4939	0.0877	0.829963	rs2472160	1	MTRNR2L7	17025	intergenic	1.527	5	8	9
rs10827807	10	37909047	T	C	0.174	6.712e-09	0.5094	0.0879	0.829963	rs2472160	1	MTRNR2L7	17188	intergenic	3.335	5	9	15
rs10764140	10	37909295	T	G	0.2624	2.36e-10	-0.4675	0.0738	0.994848	rs1535273	1	MTRNR2L7	17436	intergenic	0.709	3a	9	15
rs911176	10	37909366	T	G	0.174	5.006e-09	0.5135	0.0878	0.829963	rs2472160	1	MTRNR2L7	17507	intergenic	4.365	3a	9	15
rs10734027	10	37909407	T	C	0.175	1.86e-08	0.4934	0.0877	0.823675	rs2472160	1	MTRNR2L7	17548	intergenic	0.048	5	9	15
rs2208317	10	37911224	T	C	0.3628	0.000544	-0.2314	0.0669	0.606396	rs1535273	1	MTRNR2L7	19365	intergenic	1.3	7	7	15
rs9787710	10	37911368	A	T	0.3628	0.0005494	-0.2312	0.0669	0.606396	rs1535273	1	MTRNR2L7	19509	intergenic	6.867	5	7	15
rs56331146	10	37911942	C	CTATTT	0.4235	NA	NA	NA	0.74992	rs289638	1	MTRNR2L7	20083	intergenic	7.895	NA	7	15
rs3920554	10	37912214	A	G	0.2465	1.408e-08	0.4254	0.075	0.914988	rs1535273	1	MTRNR2L7	20355	intergenic	1.16	6	7	15
rs10740948	10	37912759	T	C	0.3628	0.0005912	-0.2307	0.0671	0.606396	rs1535273	1	MTRNR2L7	20900	intergenic	2.476	5	7	15
rs6482048	10	37913618	T	C	0.175	5.901e-09	-0.5115	0.0879	0.835876	rs2472160	1	MTRNR2L7	21759	intergenic	1.615	5	9	15
rs6482049	10	37913914	A	G	0.4235	2.251e-06	0.3073	0.065	0.74992	rs289638	1	MTRNR2L7	22055	intergenic	2.498	6	1	15
rs7099632	10	37914228	T	C	0.3628	0.0005549	0.231	0.0669	0.606396	rs1535273	1	MTRNR2L7	22369	intergenic	1.71	6	9	15
rs4934881	10	37914346	A	C	0.4235	8.116e-07	0.3148	0.0638	0.74992	rs289638	1	MTRNR2L7	22487	intergenic	1.079	7	9	15
rs1570051	10	37916034	T	C	0.3628	0.0004819	0.2335	0.0669	0.606396	rs1535273	1	MTRNR2L7	24175	intergenic	0.435	6	9	15
rs1977188	10	37916295	A	G	0.3628	0.0004855	0.2334	0.0669	0.606396	rs1535273	1	MTRNR2L7	24436	intergenic	1.546	6	9	15
rs2208318	10	37916553	T	C	0.3628	0.0004855	0.2334	0.0669	0.606396	rs1535273	1	MTRNR2L7	24694	intergenic	0.766	6	9	15
rs143604763	10	37917806	AT	A	0.3628	NA	NA	NA	0.606396	rs1535273	1	MTRNR2L7	25947	intergenic	1.053	NA	9	15
rs4934882	10	37917999	T	G	0.3638	NA	NA	NA	0.603757	rs1535273	1	MTRNR2L7	26140	intergenic	2.02	7	9	15
rs6482050	10	37918890	T	C	0.3628	0.0009172	-0.2254	0.068	0.606396	rs1535273	1	MTRNR2L7	27031	intergenic	0.982	7	15	15
rs7894839	10	37920414	T	C	0.3628	NA	NA	NA	0.606396	rs1535273	1	MTRNR2L7	28555	intergenic	0.911	6	9	15
rs7098630	10	37922699	A	G	0.3628	0.0005896	-0.23	0.0669	0.606396	rs1535273	1	MTRNR2L7	30840	intergenic	3.116	7	9	9
rs289637	10	37923183	T	C	0.3618	0.0004766	-0.2337	0.0669	0.609046	rs1535273	1	MTRNR2L7	31324	intergenic	1.904	5	8	9
rs289638	10	37923731	A	G	0.496	5.173e-09	0.3685	0.0631	1	rs289638	1	MTRNR2L7	31872	intergenic	3.034	2b	8	9
rs9418274	10	37926411	T	C	0.175	1.068e-08	0.5026	0.0879	0.835876	rs2472160	1	MTRNR2L7	34552	intergenic	4.244	5	9	9
rs289640	10	37928030	A	G	0.3628	0.0005113	-0.2325	0.0669	0.606396	rs1535273	1	MTRNR2L7	36171	intergenic	4.623	5	8	15
rs7903942	10	37929276	T	C	0.496	5.411e-09	-0.3682	0.0631	1	rs289638	1	MTRNR2L7	37417	intergenic	3.069	5	9	15
rs289641	10	37933261	A	C	0.175	5.01e-09	0.5133	0.0878	0.835876	rs2472160	1	MTRNR2L7	41402	intergenic	7.807	7	9	15
rs1885056	10	37936497	T	C	0.496	8.688e-09	0.3632	0.0631	1	rs289638	1	MTRNR2L7	44638	intergenic	1.175	5	9	15
rs1885057	10	37936501	T	G	0.496	8.175e-09	0.3638	0.0631	1	rs289638	1	MTRNR2L7	44642	intergenic	0.897	5	9	15
rs9418276	10	37940116	T	G	0.496	6.58e-09	0.3658	0.0631	1	rs289638	1	MTRNR2L7	48257	intergenic	0.391	5	9	15
rs7072977	10	37940440	A	C	0.496	6.442e-09	0.366	0.0631	1	rs289638	1	MTRNR2L7	48581	intergenic	2.169	5	9	15
rs289642	10	37941336	A	T	0.175	6.303e-09	0.5097	0.0877	0.835876	rs2472160	1	MTRNR2L7	49477	intergenic	9.448	5	9	15
rs289643	10	37941494	T	G	0.496	8.803e-09	-0.3654	0.0635	1	rs289638	1	MTRNR2L7	49635	intergenic	2.131	7	9	15
rs289645	10	37943642	T	C	0.496	7.979e-09	-0.3664	0.0635	1	rs289638	1	MTRNR2L7	51783	intergenic	1.525	4	9	9
rs35687763	10	37946966	G	GA	0.496	NA	NA	NA	1	rs289638	1	MTRNR2L7	55107	intergenic	0.077	NA	9	15
rs289646	10	37951563	T	C	0.4771	NA	NA	NA	0.923334	rs289638	1	MTRNR2L7	59704	intergenic	6.199	6	9	15
rs56081938	10	37952838	A	T	0.1799	1.85e-08	0.4866	0.0865	0.805036	rs2472160	1	MTRNR2L7	60979	intergenic	15.45	6	9	15
rs35891840	10	37955866	G	GA	0.496	NA	NA	NA	1	rs289638	1	MTRNR2L7	64007	intergenic	10.41	NA	9	15
rs56365327	10	37955970	T	C	0.175	5.227e-09	0.5123	0.0877	0.835876	rs2472160	1	MTRNR2L7	64111	intergenic	9.681	7	9	15
rs148107645	10	37956019	A	ATATCT	0.496	NA	NA	NA	1	rs289638	1	MTRNR2L7	64160	intergenic	1.103	NA	9	15
rs78443809	10	37958103	T	C	0.175	4.725e-09	-0.5145	0.0878	0.835876	rs2472160	1	MTRNR2L7	66244	intergenic	0.217	6	9	15
rs58379893	10	37966612	A	C	0.175	4.956e-09	0.5131	0.0877	0.835876	rs2472160	1	MTRNR2L7	74753	intergenic	6.991	6	7	15
rs289647	10	37968278	A	G	0.4911	5.242e-09	-0.3685	0.0631	0.981022	rs289638	1	MTRNR2L7	76419	intergenic	2.568	5	9	9
rs71007656	10	37970845	CGGCTG	C	0.494	NA	NA	NA	0.992277	rs289638	1	MTRNR2L7	78986	intergenic	NA	NA	7	9
rs289648	10	37971837	T	C	0.494	5.925e-09	-0.3672	0.0631	0.992277	rs289638	1	MTRNR2L7	79978	intergenic	0.118	5	8	9
rs57430818	10	37973686	T	C	0.1561	2.122e-08	0.5209	0.093	0.709306	rs2472160	1	MTRNR2L7	81827	intergenic	2.751	5	8	15
rs289649	10	37975384	T	C	0.493	1.544e-08	-0.3578	0.0633	0.980773	rs289638	1	MTRNR2L7	83525	intergenic	0.028	5	8	9
rs289650	10	37975505	A	C	0.499	1.726e-08	0.3565	0.0632	0.96529	rs289638	1	MTRNR2L7	83646	intergenic	1.922	5	8	9
rs9417256	10	37976990	A	G	0.499	1.94e-08	-0.3556	0.0633	0.96529	rs289638	1	MTRNR2L7	85131	intergenic	2.582	6	8	9
rs34303829	10	37977577	C	CA	0.4125	NA	NA	NA	0.633495	rs289638	1	MTRNR2L7	85718	intergenic	8.428	NA	8	15
rs55638111	10	37981689	T	C	0.175	4.631e-09	0.5141	0.0877	0.835876	rs2472160	1	ENSG00000226578	82610	intergenic	0.361	7	9	15
rs11011335	10	37983324	A	C	0.499	1.489e-08	0.3591	0.0634	0.96529	rs289638	1	ENSG00000226578	80975	intergenic	2.03	7	9	15
rs56160199	10	37983763	G	C	0.175	NA	NA	NA	0.835876	rs2472160	1	ENSG00000226578	80536	intergenic	0.539	6	9	15
rs139194473	10	37985289	T	C	0.175	NA	NA	NA	0.835876	rs2472160	1	ENSG00000226578	79010	intergenic	0.829	7	9	15
rs61618361	10	37985740	A	G	0.1799	NA	NA	NA	0.805036	rs2472160	1	ENSG00000226578	78559	intergenic	0.896	7	9	15
rs201803156	10	37986173	G	GAATCC	0.175	NA	NA	NA	0.835876	rs2472160	1	ENSG00000226578	78121	intergenic	0.722	NA	9	15
rs1987431	10	37988887	T	C	0.499	2.889e-08	-0.3512	0.0633	0.96529	rs289638	1	ENSG00000226578	75412	intergenic	2.389	NA	9	15
rs7923868	10	37989766	T	C	0.4284	2.326e-07	-0.3323	0.0643	0.727354	rs289638	1	ENSG00000226578	74533	intergenic	0.371	4	9	15
rs67598405	10	37991068	T	C	0.175	4.515e-09	0.5144	0.0877	0.835876	rs2472160	1	ENSG00000226578	73231	intergenic	0.682	5	9	9
rs1814077	10	37992018	C	G	0.499	2.39e-08	0.3533	0.0633	0.96529	rs289638	1	ENSG00000226578	72281	intergenic	0.01	5	7	9
rs56343162	10	37995633	T	C	0.165	3.318e-09	0.5454	0.0922	0.811734	rs2472160	1	ENSG00000226578	68666	intergenic	1.063	7	5	15
rs58906790	10	37999425	C	G	0.175	5.965e-09	0.5108	0.0878	0.835876	rs2472160	1	ENSG00000226578	64874	intergenic	0.105	7	5	15
rs72789877	10	38000463	T	C	0.175	5.162e-09	0.5135	0.0879	0.835876	rs2472160	1	ENSG00000226578	63836	intergenic	10.6	4	5	15
rs11011343	10	38002698	A	G	0.499	1.897e-08	-0.3559	0.0633	0.957766	rs289638	1	ENSG00000226578	61601	intergenic	3.588	5	7	15
rs76027142	10	38003359	C	CTAATGAG	0.175	NA	NA	NA	0.835876	rs2472160	1	ENSG00000226578	60933	intergenic	12.04	NA	9	15
rs7090858	10	38003670	A	C	0.499	2e-08	0.3551	0.0633	0.957766	rs289638	1	ENSG00000226578	60629	intergenic	1.538	7	9	15
rs12257836	10	38006392	C	T	0.174	NA	NA	NA	0.745185	rs2472160	1	ENSG00000226578	57907	intergenic	0.728	6	9	15
rs12257837	10	38006394	C	T	0.2674	NA	NA	NA	0.688578	rs1535273	1	ENSG00000226578	57905	intergenic	0.681	6	9	15
rs56822755	10	38009033	C	G	0.1799	2.535e-08	-0.4824	0.0866	0.805036	rs2472160	1	ENSG00000226578	55266	intergenic	0.181	6	9	9
rs2145487	10	38010077	A	G	0.499	2.653e-08	-0.3517	0.0632	0.957766	rs289638	1	ENSG00000226578	54222	intergenic	7.843	5	9	9
rs4934906	10	38015028	T	C	0.499	5.602e-08	0.3475	0.064	0.957766	rs289638	1	ENSG00000226578	49271	intergenic	2.139	7	5	15
rs4934907	10	38015230	A	C	0.499	3.459e-08	-0.3499	0.0634	0.957766	rs289638	1	ENSG00000226578	49069	intergenic	2.331	6	5	15
rs927425	10	38021143	T	G	0.499	2.897e-08	-0.351	0.0633	0.950149	rs289638	1	ENSG00000226578	43156	intergenic	0.832	6	9	15
rs67276704	10	38021269	C	G	0.2485	3.055e-08	-0.417	0.0753	0.834877	rs1535273	1	ENSG00000226578	43030	intergenic	0.739	7	7	15
rs68087889	10	38024065	T	C	0.2416	9.975e-09	-0.4346	0.0758	0.860675	rs1535273	1	ENSG00000226578	40234	intergenic	0.457	4	5	15
rs75454175	10	38024552	T	C	0.175	6.439e-09	-0.5109	0.088	0.835876	rs2472160	1	ENSG00000226578	39747	intergenic	2.582	7	5	15
rs55637824	10	38027403	T	C	0.175	1.125e-08	0.5076	0.0889	0.835876	rs2472160	1	ENSG00000226578	36896	intergenic	0.063	5	5	9
rs72789892	10	38027989	T	C	0.175	6.906e-09	0.51	0.088	0.835876	rs2472160	1	ENSG00000226578	36310	intergenic	2.792	7	5	15
rs56905472	10	38028735	A	G	0.1909	1.151e-10	0.5478	0.085	0.93637	rs2472160	1	ENSG00000226578	35564	intergenic	0.141	7	5	15
rs67011531	10	38030394	T	C	0.1909	1.159e-10	-0.5477	0.085	0.93637	rs2472160	1	ENSG00000226578	33905	intergenic	3.79	7	5	15
rs11011351	10	38030525	A	G	0.499	3.345e-08	-0.3494	0.0633	0.957766	rs289638	1	ENSG00000226578	33774	intergenic	1.845	5	5	15
rs16937569	10	38030639	A	G	0.1909	1.012e-10	0.5495	0.085	0.93637	rs2472160	1	ENSG00000226578	33660	intergenic	3.095	5	5	15
rs138073582	10	38032068	T	TG	0.2276	NA	NA	NA	0.765007	rs2472160	1	ENSG00000226578	32231	intergenic	6.664	NA	5	15
rs2295647	10	38032830	T	G	0.174	1.453e-08	0.5099	0.09	0.842223	rs2472160	1	ENSG00000226578	31469	intergenic	4.937	5	5	15
rs4934912	10	38035213	A	G	0.499	3.429e-08	-0.3492	0.0633	0.957766	rs289638	1	ENSG00000226578	29086	intergenic	11.97	6	5	15
rs16937571	10	38036032	A	C	0.2575	2.131e-10	-0.473	0.0745	0.938403	rs1535273	1	ENSG00000226578	28267	intergenic	11.48	7	5	15
rs72789899	10	38038926	A	G	0.174	1.623e-08	0.5007	0.0887	0.842223	rs2472160	1	ENSG00000226578	25373	intergenic	3.104	7	5	15
rs72791703	10	38040377	T	C	0.165	4.815e-09	0.5414	0.0925	0.811734	rs2472160	1	ENSG00000226578	23922	intergenic	9.342	7	5	15
rs1022698	10	38041934	A	G	0.499	3.268e-08	-0.3497	0.0633	0.957766	rs289638	1	ENSG00000226578	22365	intergenic	0.968	NA	5	15
rs1208767	10	38042295	T	G	0.498	3.429e-08	0.3492	0.0633	0.954136	rs289638	1	ENSG00000226578	22004	intergenic	NA	5	5	15
rs12774732	10	38045483	T	C	0.499	3.17e-08	0.3505	0.0634	0.957766	rs289638	1	ENSG00000226578	18816	intergenic	3.099	7	5	15
rs1779017	10	38052239	A	C	0.499	3.038e-08	0.3505	0.0633	0.957766	rs289638	1	ENSG00000226578	12060	intergenic	2.02	NA	5	9
rs12413854	10	38053283	T	C	0.2575	1.875e-10	-0.4746	0.0745	0.938403	rs1535273	1	ENSG00000226578	11016	intergenic	6.246	5	5	9
rs1779006	10	38053889	T	C	0.4195	NA	NA	NA	0.69318	rs289638	1	ENSG00000226578	10410	intergenic	7.19	NA	5	9
rs55738335	10	38054388	T	C	0.2575	1.832e-10	-0.4749	0.0745	0.938403	rs1535273	1	ENSG00000226578	9911	intergenic	2.812	4	5	9
rs7068885	10	38054935	C	T	0.2575	NA	NA	NA	0.938403	rs1535273	1	ENSG00000226578	9364	intergenic	0.733	5	5	15
rs150700139	10	38057345	C	CT	0.1909	NA	NA	NA	0.93637	rs2472160	1	ENSG00000226578	6953	intergenic	2.43	NA	5	15
rs182423331	10	38059073	T	C	0.165	NA	NA	NA	0.811734	rs2472160	1	ENSG00000226578	5226	intergenic	3.965	6	5	15
rs11011361	10	38059364	G	A	0.499	NA	NA	NA	0.957766	rs289638	1	ENSG00000226578	4935	intergenic	1.493	6	5	15
rs150455091	10	38059907	C	T	0.499	NA	NA	NA	0.957766	rs289638	1	ENSG00000226578	4392	intergenic	1.487	6	5	15
rs141306584	10	38060244	C	T	0.2575	NA	NA	NA	0.938403	rs1535273	1	ENSG00000226578	4055	intergenic	2.325	7	5	15
rs78120648	10	38060502	T	C	0.2575	2.989e-10	-0.4708	0.0747	0.938403	rs1535273	1	ENSG00000226578	3797	intergenic	2.743	6	5	15
rs10508861	10	38064069	A	G	0.2594	6.889e-11	0.4855	0.0744	0.928134	rs1535273	1	ENSG00000226578	0	downstream	1.555	7	5	15
rs72321315	10	38076435	G	GTTTA	0.5	NA	NA	NA	0.938593	rs289638	1	ENSG00000226578	3376	intergenic	NA	NA	5	15
rs61458852	10	38076574	CA	C	0.498	NA	NA	NA	0.899474	rs289638	1	ENSG00000226578	3515	intergenic	NA	NA	5	15
rs531015809	10	38078219	CA	C	0.2634	NA	NA	NA	0.86704	rs1535273	1	ENSG00000260137	2289	intergenic	NA	NA	5	15
rs35795208	10	38079033	C	CA	0.332	NA	NA	NA	0.678749	rs1535273	1	ENSG00000260137	1474	intergenic	2.346	NA	5	15
rs12243792	10	38081716	A	G	0.2584	5.246e-11	0.4887	0.0745	0.923138	rs1535273	1	ENSG00000260137	0	downstream	8.177	7	5	15
rs12412402	10	38083003	A	G	0.2584	4.747e-11	0.4896	0.0744	0.923138	rs1535273	1	ZNF33BP1	0	downstream	0.038	7	5	9
rs1208708	10	38085576	A	G	0.4702	2.507e-07	-0.3344	0.0648	0.819713	rs289638	1	ZNF33BP1	0	upstream	2.408	7	5	15
rs11011371	10	38087166	T	G	0.2644	1.818e-10	-0.4716	0.074	0.903807	rs1535273	1	ZNF33BP1	2129	intergenic	7.974	7	5	15
rs59486180	10	38090634	T	G	0.2604	5.544e-11	-0.4885	0.0745	0.923049	rs1535273	1	ZNF248	1117	intergenic	5.275	5	4	15
rs3739992	10	38091148	A	G	0.2634	1.622e-10	0.4727	0.0739	0.898836	rs1535273	1	ZNF248	0	downstream	0.528	7	4	15
rs1208681	10	38092975	T	C	0.499	9.186e-09	0.3639	0.0633	0.942564	rs289638	1	ZNF248	0	intronic	3.217	7	4	15
rs58677007	10	38093034	TC	T	0.2406	NA	NA	NA	0.83449	rs1535273	1	ZNF248	0	intronic	NA	NA	5	15
rs55742761	10	38093544	T	C	0.2584	4.86e-11	-0.4899	0.0745	0.923138	rs1535273	1	ZNF248	0	intronic	8.504	5	5	15
rs1208684	10	38093936	A	G	0.499	9.984e-09	0.3632	0.0634	0.942564	rs289638	1	ZNF248	0	intronic	2.312	NA	5	15
rs12265979	10	38094540	A	T	0.2425	2.066e-09	0.4554	0.076	0.845434	rs1535273	1	ZNF248	0	intronic	5.77	5	5	15
rs1208689	10	38097775	C	G	0.494	3.738e-08	-0.3488	0.0634	0.887858	rs289638	1	ZNF248	0	intronic	6.442	7	5	15
rs72791720	10	38099823	A	G	0.175	7.431e-10	-0.5448	0.0885	0.884942	rs2472160	1	ZNF248	0	intronic	9.635	5	5	9
rs200903	10	38101578	T	C	0.494	3.953e-08	0.3482	0.0634	0.887858	rs289638	1	ZNF248	0	intronic	3.099	5	5	9
rs200907	10	38104487	T	C	0.2485	2.84e-10	-0.4766	0.0756	0.853892	rs1535273	1	ZNF248	0	intronic	3.382	7	5	9
rs71007668	10	38104919	GA	G	0.3479	NA	NA	NA	0.632884	rs2504142	1	ZNF248	0	intronic	0.73	NA	5	9
rs35493240	10	38106303	T	TA	0.4751	NA	NA	NA	0.835088	rs289638	1	ZNF248	0	intronic	NA	NA	5	9
rs200909	10	38106609	C	G	0.2485	2.916e-10	0.4763	0.0756	0.853892	rs1535273	1	ZNF248	0	intronic	0.274	6	5	9
rs200910	10	38108176	T	C	0.494	3.793e-08	0.3485	0.0634	0.887858	rs289638	1	ENSG00000228828	0	ncRNA_exonic	7.886	7	5	9
rs546474587	10	38114825	GA	G	0.2485	NA	NA	NA	0.833756	rs1535273	1	ZNF248	0	intronic	0.04	NA	4	9
rs200913	10	38116818	A	T	0.2495	1.12e-10	0.4872	0.0755	0.858582	rs1535273	1	ZNF248	0	intronic	5.829	7	4	9
rs11392605	10	38117223	TA	T	0.2495	NA	NA	NA	0.858582	rs1535273	1	ZNF248	0	intronic	3.988	NA	4	5
rs200914	10	38117691	T	C	0.2545	3.996e-10	-0.4691	0.075	0.834342	rs1535273	1	ZNF248	0	intronic	2.97	6	4	8
rs200924	10	38126170	T	C	0.494	3.972e-08	0.3486	0.0635	0.887858	rs289638	1	ZNF248	0	intronic	3.137	6	4	4
rs200931	10	38128434	C	A	0.492	NA	NA	NA	0.880871	rs289638	1	ZNF248	0	intronic	0.5	5	4	5
rs72791726	10	38129650	T	C	0.175	9.507e-10	0.5425	0.0887	0.884942	rs2472160	1	ZNF248	0	intronic	5.989	7	4	5
rs72791727	10	38129909	T	C	0.175	9.479e-10	-0.5425	0.0887	0.884942	rs2472160	1	ZNF248	0	intronic	4.261	7	4	5
rs200935	10	38132810	A	T	0.494	3.808e-08	0.3492	0.0635	0.887858	rs289638	1	ZNF248	0	intronic	1.814	6	4	5
rs200936	10	38134935	T	C	0.494	3.869e-08	-0.349	0.0635	0.887858	rs289638	1	ZNF248	0	intronic	1.888	7	4	5
rs200937	10	38135772	T	C	0.494	3.884e-08	-0.349	0.0635	0.887858	rs289638	1	ZNF248	0	intronic	9.653	6	4	5
rs200939	10	38139483	T	C	0.492	3.965e-08	-0.3491	0.0636	0.880383	rs289638	1	ZNF248	0	intronic	0.57	6	5	5
rs200941	10	38141560	T	G	0.2475	5.49e-10	-0.4766	0.0768	0.848773	rs1535273	1	ZNF248	0	intronic	6.85	6	4	5
rs72791730	10	38142260	A	G	0.174	9.219e-10	0.5434	0.0888	0.891076	rs2472160	1	ZNF248	0	intronic	10.49	7	4	5
rs34033199	10	38145561	GA	G	0.4901	NA	NA	NA	0.850126	rs289638	1	ZNF248	0	intronic	NA	NA	1	1
rs200943	10	38148730	G	A	0.493	NA	NA	NA	0.884114	rs289638	1	ENSG00000236514	0	downstream	2.78	7	5	15
rs200944	10	38150036	T	C	0.2535	4.406e-10	-0.4681	0.075	0.829024	rs1535273	1	ENSG00000236514	1998	intergenic	1.155	4	2	15
rs2753883	10	38150662	T	G	0.2535	4.407e-10	0.4681	0.075	0.829024	rs1535273	1	ENSG00000236514	2624	intergenic	9.333	7	5	15
rs10827835	10	38150709	A	G	0.492	4.983e-08	-0.3468	0.0636	0.880383	rs289638	1	ENSG00000236514	2671	intergenic	5.312	7	5	15
rs1208621	10	38151946	T	C	0.2485	1.338e-10	-0.4859	0.0757	0.853456	rs1535273	1	ENSG00000236514	3908	intergenic	0.585	7	5	15
rs10764147	10	38153862	A	G	0.493	8.609e-08	0.3428	0.064	0.884114	rs289638	1	ENSG00000236514	5824	intergenic	1.734	6	5	15
rs719569	10	38154415	T	G	0.493	4.232e-08	0.3479	0.0635	0.884114	rs289638	1	ENSG00000236514	6377	intergenic	10.23	NA	5	15
rs78226918	10	38156299	C	CT	0.2475	NA	NA	NA	0.848773	rs1535273	1	ENSG00000236514	8261	intergenic	NA	NA	5	15
rs7906186	10	38157928	T	C	0.174	8.623e-10	-0.5448	0.0888	0.891076	rs2472160	1	ENSG00000236514	9890	intergenic	2.169	5	5	15
rs4934916	10	38160098	T	C	0.493	4.043e-08	-0.3484	0.0635	0.884114	rs289638	1	ENSG00000236514	12060	intergenic	1.247	7	5	15
rs1208619	10	38164272	T	C	0.2535	6.617e-10	-0.4666	0.0756	0.829024	rs1535273	1	ENSG00000151963	8250	intergenic	4.736	7	5	15
rs1779073	10	38166498	A	G	0.2485	1.736e-10	0.4828	0.0756	0.853456	rs1535273	1	ENSG00000151963	6024	intergenic	2.471	6	5	15
rs1735625	10	38170306	T	C	0.2535	4.922e-10	0.4671	0.0751	0.829024	rs1535273	1	ENSG00000151963	2216	intergenic	2.573	6	5	15
rs2738221	10	38173372	T	C	0.2485	1.725e-10	0.483	0.0757	0.853456	rs1535273	1	ENSG00000151963	0	downstream	3.434	7	5	15
rs3851078	10	38177708	A	G	0.493	4.472e-08	-0.3481	0.0636	0.884114	rs289638	1	ENSG00000151963	4671	intergenic	3.315	7	9	15
rs10740951	10	38182163	A	G	0.493	2.523e-08	-0.3557	0.0638	0.884114	rs289638	1	ZNF33AP1	1402	intergenic	0.634	6	9	15
rs10764148	10	38182447	C	G	0.494	4.834e-08	0.3511	0.0643	0.880567	rs289638	1	ZNF33AP1	1118	intergenic	0.683	7	9	15
rs7099777	10	38183569	A	C	0.493	3.695e-08	0.3491	0.0634	0.884114	rs289638	1	ZNF33AP1	0	ncRNA_exonic	2.379	6	9	9
rs7913068	10	38186590	G	A	0.493	NA	NA	NA	0.884114	rs289638	1	ZNF33AP1	0	downstream	1.132	6	9	15
rs140405675	10	38189049	G	A	0.493	NA	NA	NA	0.884114	rs289638	1	ZNF33AP1	3455	intergenic	0.936	6	15	15
rs12413359	10	38191462	A	G	0.2535	NA	NA	NA	0.829024	rs1535273	1	ZNF33AP1	5868	intergenic	1.092	6	9	15
rs7907858	10	38192504	A	C	0.493	3.68e-08	0.3492	0.0634	0.884114	rs289638	1	ZNF33AP1	6910	intergenic	NA	6	9	15
rs60201594	10	38193029	A	AC	0.2485	NA	NA	NA	0.853456	rs1535273	1	ZNF33AP1	7435	intergenic	0.816	NA	9	15
rs1779138	10	38195308	A	C	0.2485	1.731e-10	0.4828	0.0756	0.853456	rs1535273	1	ZNF33AP1	9714	intergenic	10.9	NA	9	15
rs7917943	10	38195811	T	A	0.493	NA	NA	NA	0.884114	rs289638	1	ZNF33AP1	10217	intergenic	9.034	6	9	15
rs72791758	10	38196800	T	C	0.174	8.386e-10	0.5458	0.0889	0.891076	rs2472160	1	ZNF33AP1	11206	intergenic	5.677	7	9	15
rs545131690	10	38199448	AT	A	0.5	NA	NA	NA	0.863451	rs289638	1	ZNF33AP1	13854	intergenic	NA	NA	9	15
rs60216696	10	38199558	T	C	0.1889	1.945e-11	-0.5734	0.0855	0.986862	rs2472160	1	ZNF33AP1	13964	intergenic	9.477	7	9	15
rs72791759	10	38199676	T	G	0.165	1.771e-09	-0.5641	0.0937	0.849043	rs2472160	1	ZNF33AP1	14082	intergenic	11.37	7	9	15
rs2474542	10	38209639	T	C	0.1909	2.599e-11	0.5688	0.0853	0.986958	rs2472160	1	ZNF33AP1	24045	intergenic	0.021	NA	5	15
rs1208592	10	38212667	T	C	0.4911	4.935e-08	0.3462	0.0635	0.877155	rs289638	1	ZNF25	25833	intergenic	8.42	7	5	15
rs10827836	10	38215441	A	G	0.4911	5.406e-08	0.3461	0.0637	0.877155	rs289638	1	ZNF25	23059	intergenic	6.188	6	5	15
rs2474540	10	38215559	T	C	0.174	1.44e-09	-0.5386	0.089	0.891076	rs2472160	1	ZNF25	22941	intergenic	5.303	NA	5	15
rs2749558	10	38216363	T	C	0.2843	1.017e-13	0.5268	0.0708	0.92866	rs1005277	1	ZNF25	22137	intergenic	2.503	NA	5	15
rs1005277	10	38218259	A	C	0.3002	2.173e-14	0.5328	0.0697	1	rs1005277	1	ZNF25	20241	intergenic	1.472	7	5	15
rs1005278	10	38218748	A	G	0.4026	8.638e-07	-0.3211	0.0653	0.631104	rs1005277	1	ZNF25	19752	intergenic	15.1	7	5	15
rs1735577	10	38220010	A	G	0.493	3.966e-08	-0.349	0.0635	0.884114	rs289638	1	ZNF25	18490	intergenic	0.005	4	5	15
rs569819888	10	38220735	CT	C	0.1829	NA	NA	NA	0.7934	rs2472160	1	ZNF25	17765	intergenic	NA	NA	5	15
rs1208559	10	38221370	T	C	0.4761	6.457e-07	0.3225	0.0648	0.756908	rs289638	1	ZNF25	17130	intergenic	3.296	7	5	15
rs1208578	10	38233864	A	T	0.2485	2.514e-10	0.4787	0.0757	0.853456	rs1535273	1	ZNF25	4636	intergenic	0.128	6	4	15
rs2247535	10	38234191	C	G	0.174	9.771e-10	-0.545	0.0892	0.891076	rs2472160	1	ZNF25	4309	intergenic	0.051	5	4	15
rs556434982	10	38234419	GT	G	0.4414	NA	NA	NA	0.652246	rs289638	1	ZNF25	4081	intergenic	NA	NA	4	15
rs11011407	10	38234951	A	T	0.493	5.307e-08	0.3477	0.0639	0.884114	rs289638	1	ZNF25	3549	intergenic	0.379	6	4	15
rs2504147	10	38235569	A	G	0.174	7.498e-10	-0.5468	0.0888	0.891076	rs2472160	1	ZNF25	2931	intergenic	1.063	6	5	15
rs77431201	10	38237486	C	CATT	0.2485	NA	NA	NA	0.853456	rs1535273	1	ZNF25	1011	intergenic	5.175	NA	4	5
rs35754665	10	38239494	A	ATT	0.2485	NA	NA	NA	0.853456	rs1535273	1	ZNF25	0	UTR3	NA	NA	4	5
rs13503	10	38239843	A	C	0.493	3.108e-08	-0.3516	0.0635	0.884114	rs289638	1	ZNF25	0	UTR3	6.203	7	4	5
rs2489166	10	38245597	T	C	0.2485	2.327e-10	0.4794	0.0756	0.853456	rs1535273	1	ZNF25	0	intronic	6.166	7	4	4
rs7069702	10	38247359	T	G	0.493	2.995e-08	-0.3518	0.0635	0.884114	rs289638	1	ZNF25	0	intronic	0.121	7	4	5
rs17608725	10	38249297	T	C	0.2485	2.374e-10	0.4793	0.0757	0.853456	rs1535273	1	ZNF25	0	intronic	0.995	7	4	5
rs766362	10	38250206	C	G	0.2485	2.327e-10	0.4794	0.0756	0.853456	rs1535273	1	ZNF25	0	intronic	0.21	6	4	5
rs2474553	10	38251000	T	C	0.2485	2.444e-10	-0.4786	0.0756	0.853456	rs1535273	1	ZNF25	0	intronic	1.115	NA	4	5
rs2504130	10	38251085	T	C	0.493	2.912e-08	-0.3521	0.0635	0.884114	rs289638	1	ZNF25	0	intronic	2.491	NA	4	5
rs2144849	10	38259321	A	G	0.493	2.965e-08	0.3516	0.0634	0.884114	rs289638	1	ZNF25	0	intronic	1.161	NA	4	5
rs35376573	10	38260243	C	CA	0.497	NA	NA	NA	0.711419	rs289638	1	ZNF25	0	intronic	4.466	NA	4	5
rs2180408	10	38262957	T	C	0.492	2.184e-08	0.356	0.0636	0.880871	rs289638	1	ZNF25	0	intronic	8.56	NA	5	5
rs72791791	10	38264222	A	G	0.17	2.116e-09	0.5427	0.0906	0.866936	rs2472160	1	ZNF25	0	intronic	4.013	7	1	5
rs7895468	10	38264700	T	C	0.2445	7.176e-10	0.4693	0.0762	0.834911	rs1535273	1	ZNF25	0	intronic	6.772	4	1	2
rs9418311	10	38269711	C	G	0.2485	1.764e-10	-0.4824	0.0756	0.853456	rs1535273	1	ENSG00000226447	0	ncRNA_intronic	5.013	6	5	15
rs2474552	10	38276635	C	G	0.2485	2.01e-10	-0.4809	0.0756	0.853456	rs1535273	1	ENSG00000226447	0	ncRNA_intronic	0.59	6	9	15
rs2504128	10	38276810	T	G	0.2485	1.833e-10	0.4819	0.0756	0.853456	rs1535273	1	ENSG00000226447	0	ncRNA_intronic	0.33	6	9	15
rs59124753	10	38277022	C	G	0.494	2.668e-08	-0.3531	0.0635	0.880077	rs289638	1	ENSG00000226447	0	ncRNA_intronic	0.164	7	9	15
rs7903476	10	38279378	A	T	0.2485	1.895e-10	-0.4821	0.0757	0.853456	rs1535273	1	ENSG00000226447	0	ncRNA_intronic	3.925	6	9	15
rs2738205	10	38280348	A	G	0.494	3.435e-08	-0.3503	0.0635	0.880077	rs289638	1	ENSG00000226447	0	ncRNA_intronic	6.002	5	9	15
rs151045211	10	38281985	G	GGC	0.4235	NA	NA	NA	0.617807	rs289638	1	ENSG00000226447	0	downstream	NA	NA	9	15
rs11527711	10	38286013	C	A	0.494	NA	NA	NA	0.880077	rs289638	1	ENSG00000206840	2110	intergenic	1.005	7	15	15
rs148493917	10	38286610	A	G	0.494	NA	NA	NA	0.880077	rs289638	1	ENSG00000206840	2707	intergenic	0.193	6	15	15
rs200200166	10	38287333	A	G	0.174	NA	NA	NA	0.891076	rs2472160	1	ENSG00000206840	3430	intergenic	2.67	6	15	15
rs145859596	10	38288348	C	G	0.1899	NA	NA	NA	0.993471	rs2472160	1	ENSG00000206840	4445	intergenic	0.657	7	15	15
rs200347953	10	38288733	T	C	0.497	NA	NA	NA	0.868548	rs289638	1	ENSG00000206840	4830	intergenic	2.232	6	15	15
rs201413318	10	38288735	C	G	0.497	NA	NA	NA	0.868548	rs289638	1	ENSG00000206840	4832	intergenic	2.081	6	15	15
rs2472150	10	38290878	T	C	0.499	1.077e-07	-0.3378	0.0636	0.87566	rs289638	1	ENSG00000206840	6975	intergenic	0.872	7	7	15
rs12414618	10	38291197	A	T	0.2485	2.096e-10	0.4804	0.0756	0.853456	rs1535273	1	ENSG00000206840	7294	intergenic	4.838	7	7	15
rs2257186	10	38292677	C	T	0.494	NA	NA	NA	0.880077	rs289638	1	ZNF33A	6901	intergenic	2.813	4	2	15
rs2504138	10	38295825	T	C	0.174	5.245e-10	0.5542	0.0892	0.891076	rs2472160	1	ZNF33A	3753	intergenic	10.04	NA	5	15
rs2504137	10	38297426	T	C	0.2485	2.047e-10	0.4805	0.0756	0.853456	rs1535273	1	ZNF33A	2152	intergenic	0.693	NA	2	15
rs639479	10	38298006	A	T	0.494	3.216e-08	-0.3507	0.0634	0.880077	rs289638	1	ZNF33A	1572	intergenic	5.454	6	2	15
rs77733567	10	38301487	C	G	0.174	3.876e-10	0.5562	0.0889	0.891076	rs2472160	1	ZNF33A	0	intronic	0.061	5	1	5
rs12413083	10	38303368	A	G	0.1899	1.432e-11	-0.5767	0.0854	0.993471	rs2472160	1	ZNF33A	0	intronic	0.857	7	4	5
rs2472153	10	38303815	T	C	0.2485	1.896e-10	0.4814	0.0756	0.853456	rs1535273	1	ZNF33A	0	intronic	10.63	6	4	4
rs2178958	10	38309674	A	C	0.2485	NA	NA	NA	0.853456	rs1535273	1	ZNF33A	0	intronic	1.433	7	4	4
rs640774	10	38310056	A	G	0.494	3.111e-08	0.3509	0.0634	0.880077	rs289638	1	ZNF33A	0	intronic	0.568	7	4	5
rs55816483	10	38310449	G	T	0.494	NA	NA	NA	0.880077	rs289638	1	ZNF33A	0	intronic	NA	7	4	5
rs2504155	10	38310512	A	G	0.494	3.102e-08	-0.3511	0.0634	0.880077	rs289638	1	ZNF33A	0	intronic	1.061	6	4	5
rs626519	10	38311777	A	G	0.494	2.882e-08	-0.3529	0.0636	0.880077	rs289638	1	ZNF33A	0	intronic	0.817	NA	4	5
rs623149	10	38314884	T	C	0.493	3.294e-08	0.3508	0.0635	0.876334	rs289638	1	ZNF33A	0	intronic	1.074	7	4	4
rs623454	10	38314891	T	G	0.493	3.294e-08	0.3508	0.0635	0.876334	rs289638	1	ZNF33A	0	intronic	1.635	6	4	4
rs619739	10	38318975	T	C	0.494	3.097e-08	0.3511	0.0634	0.880077	rs289638	1	ZNF33A	0	intronic	1.217	NA	4	5
rs17609018	10	38320124	A	C	0.165	1.126e-09	0.5753	0.0945	0.849043	rs2472160	1	ZNF33A	0	intronic	9.045	6	4	5
rs2474545	10	38321461	C	G	0.2485	2.023e-10	-0.4815	0.0757	0.853456	rs1535273	1	ZNF33A	0	intronic	1.575	5	4	5
rs662945	10	38322766	A	G	0.494	3.212e-08	-0.3512	0.0635	0.880077	rs289638	1	ZNF33A	0	intronic	1.687	NA	4	5
rs112880747	10	38324086	C	G	0.2485	1.732e-10	-0.4828	0.0756	0.853456	rs1535273	1	ZNF33A	0	intronic	1.516	7	4	4
rs2474539	10	38327606	T	C	0.174	5.21e-10	0.5556	0.0894	0.891076	rs2472160	1	ZNF33A	0	intronic	1.12	NA	1	5
rs72793732	10	38329939	A	T	0.174	3.822e-10	-0.5587	0.0892	0.891076	rs2472160	1	ZNF33A	0	intronic	7.779	5	4	5
rs60211584	10	38331343	T	C	0.174	3.833e-10	0.5587	0.0892	0.891076	rs2472160	1	ZNF33A	0	intronic	8.603	6	4	5
rs150377453	10	38332437	TA	T	0.5	NA	NA	NA	0.870783	rs289638	1	ZNF33A	0	intronic	NA	NA	4	5
rs72793734	10	38332713	A	G	0.175	4.034e-10	-0.5582	0.0893	0.884382	rs2472160	1	ZNF33A	0	intronic	6.792	5	2	5
rs7909481	10	38333321	A	G	0.494	NA	NA	NA	0.880077	rs289638	1	ZNF33A	0	intronic	4.468	5	4	5
rs645064	10	38334341	T	C	0.494	2.917e-08	-0.3516	0.0634	0.880077	rs289638	1	ZNF33A	0	intronic	1.849	NA	4	5
rs629577	10	38335178	A	G	0.494	3.037e-08	0.3512	0.0634	0.880077	rs289638	1	ZNF33A	0	intronic	3.288	7	4	5
rs527163	10	38335490	T	C	0.494	2.856e-08	0.3517	0.0634	0.880077	rs289638	1	ZNF33A	0	intronic	0.146	6	4	5
rs2472159	10	38335947	A	G	0.2485	1.719e-10	-0.4821	0.0755	0.853456	rs1535273	1	ZNF33A	0	intronic	3.108	6	4	5
rs2472160	10	38343260	A	G	0.1889	1.231e-11	0.5772	0.0852	1	rs2472160	1	ZNF33A	0	intronic	5.421	5	4	8
rs2505232	10	38344700	C	G	0.493	2.438e-08	-0.3535	0.0634	0.876334	rs289638	1	ZNF33A	0	exonic	0.009	4	4	8
rs496627	10	38350398	A	G	0.493	2.351e-08	0.3539	0.0634	0.876334	rs289638	1	ZNF33A	0	intronic	0.806	7	4	8
rs2480521	10	38350722	C	G	0.2495	1.624e-10	-0.4826	0.0755	0.838417	rs1535273	1	ZNF33A	0	intronic	3.864	7	4	5
rs2505218	10	38354006	A	G	0.2475	1.628e-10	-0.4826	0.0755	0.848773	rs1535273	1	ZNF33A	0	UTR3	2.839	NA	4	15
rs664543	10	38357201	A	G	0.2326	4.714e-09	0.4533	0.0774	0.770388	rs1535273	1	ZNF33A	3185	intergenic	1.086	6	5	15
rs677565	10	38357774	A	G	0.2326	4.337e-09	0.4547	0.0774	0.770388	rs1535273	1	ZNF33A	3758	intergenic	1.35	5	5	15
rs199522782	10	38360419	CAT	C	0.4264	NA	NA	NA	0.682911	rs289638	1	ZNF33A	6403	intergenic	NA	NA	5	15
rs9417290	10	38360518	A	T	0.174	NA	NA	NA	0.891076	rs2472160	1	ZNF33A	6502	intergenic	4.393	6	5	15
rs2021652	10	38360808	T	C	0.2485	NA	NA	NA	0.853456	rs1535273	1	ZNF33A	6792	intergenic	0.856	NA	5	15
rs2021651	10	38360809	T	C	0.2485	1.849e-10	0.4831	0.0758	0.853456	rs1535273	1	ZNF33A	6793	intergenic	0.678	NA	5	15
rs176831	10	38361703	T	C	0.2505	1.673e-10	-0.4826	0.0755	0.843109	rs1535273	1	EIF3LP3	7281	intergenic	0.68	5	1	15
rs176832	10	38361991	T	C	0.2505	2.107e-10	-0.4806	0.0756	0.843109	rs1535273	1	EIF3LP3	6993	intergenic	4.209	7	1	15
rs2474582	10	38364506	T	C	0.2485	1.773e-10	0.4825	0.0756	0.853456	rs1535273	1	EIF3LP3	4478	intergenic	1.462	7	9	15
rs176833	10	38365283	A	G	0.496	5.339e-08	0.3466	0.0637	0.873057	rs289638	1	EIF3LP3	3701	intergenic	0.84	5	9	15
rs2474593	10	38366072	A	G	0.2326	5.178e-09	0.4531	0.0776	0.770388	rs1535273	1	EIF3LP3	2912	intergenic	7.415	5	9	9
rs2472170	10	38368445	C	G	0.2356	6.899e-09	-0.4493	0.0776	0.754586	rs1535273	1	EIF3LP3	0	downstream	1.92	7	9	15
rs2505256	10	38369818	A	T	0.4901	2.147e-08	-0.3593	0.0642	0.85176	rs289638	1	EIF3LP3	0	upstream	0.028	6	9	15
rs176838	10	38371899	A	T	0.4066	2.268e-10	0.4062	0.0641	0.98687	rs2504142	1	EIF3LP3	2094	intergenic	1.535	7	9	15
rs2505257	10	38372664	A	G	0.4095	3.13e-10	-0.4046	0.0643	0.973888	rs2504142	1	EIF3LP3	2859	intergenic	0.772	6	9	15
rs111710158	10	38372924	GAC	G	0.4155	NA	NA	NA	0.948945	rs2504142	1	EIF3LP3	3119	intergenic	0.245	NA	9	15
rs1033669	10	38374346	A	G	0.4056	2.653e-10	0.4042	0.064	0.991234	rs2504142	1	EIF3LP3	4541	intergenic	1.538	7	9	15
rs549071912	10	38374363	C	CAA	0.3956	NA	NA	NA	0.758116	rs2504142	1	EIF3LP3	4558	intergenic	4.928	NA	9	15
rs2472173	10	38374638	A	G	0.4056	2.502e-10	0.4049	0.064	0.991234	rs2504142	1	EIF3LP3	4833	intergenic	2.494	5	7	15
rs2472174	10	38375382	A	G	0.4066	2.63e-10	-0.4044	0.064	0.98687	rs2504142	1	FXYD6P2	5310	intergenic	2.016	7	7	15
rs2474563	10	38375938	T	C	0.4066	3.761e-10	-0.4014	0.0641	0.98687	rs2504142	1	FXYD6P2	4754	intergenic	6.8	6	5	15
rs139645413	10	38375992	TTG	T	0.4125	NA	NA	NA	0.961541	rs2504142	1	FXYD6P2	4700	intergenic	0.616	NA	5	15
rs4385831	10	38376646	A	T	0.492	NA	NA	NA	0.747849	rs289638	1	FXYD6P2	4046	intergenic	6.061	7	5	15
rs9418322	10	38377296	T	G	0.4056	2.688e-10	0.4043	0.064	0.991234	rs2504142	1	FXYD6P2	3396	intergenic	6.813	5	5	15
rs9299760	10	38377920	T	C	0.4056	2.882e-10	0.4033	0.064	0.991234	rs2504142	1	FXYD6P2	2772	intergenic	6.655	7	5	15
rs2023351	10	38378814	A	G	0.4056	3.328e-10	-0.402	0.064	0.991234	rs2504142	1	FXYD6P2	1878	intergenic	0.206	6	5	15
rs2023299	10	38379011	T	C	0.492	1.945e-06	0.3014	0.0633	0.747849	rs289638	1	FXYD6P2	1681	intergenic	8.013	6	5	15
rs9299761	10	38380127	CTG	C	0.4036	NA	NA	NA	1	rs2504142	1	FXYD6P2	0	downstream	8.771	NA	5	15
rs35696075	10	38380281	G	GA	0.4036	NA	NA	NA	1	rs2504142	1	FXYD6P2	0	downstream	0.21	NA	5	15
rs2474564	10	38380661	A	G	0.4901	1.758e-06	0.3035	0.0635	0.74127	rs289638	1	FXYD6P2	0	downstream	2.988	6	5	15
rs2474565	10	38380828	A	G	0.4036	2.882e-10	-0.4042	0.0641	1	rs2504142	1	FXYD6P2	0	ncRNA_exonic	0.011	5	5	15
rs932538	10	38381314	T	C	0.4095	4.847e-10	-0.3974	0.0638	0.974125	rs2504142	1	FXYD6P2	0	upstream	0.112	6	5	15
rs113142948	10	38381415	GGCAAT	G	0.4036	NA	NA	NA	1	rs2504142	1	FXYD6P2	0	upstream	0.128	NA	5	15
rs7915062	10	38381879	A	G	0.4901	1.728e-06	0.3026	0.0633	0.74127	rs289638	1	FXYD6P2	0	upstream	NA	6	5	15
rs78810455	10	38382206	TC	T	0.4046	NA	NA	NA	0.99559	rs2504142	1	ZNF37A	1058	intergenic	NA	NA	5	15
rs113179708	10	38382263	A	G	0.175	2.893e-08	0.5025	0.0906	0.746859	rs2472160	1	ZNF37A	1001	intergenic	0.265	7	5	15
rs2474566	10	38382376	T	G	0.4036	3.046e-10	0.4025	0.0639	1	rs2504142	1	ZNF37A	0	upstream	0.05	7	5	15
rs2474567	10	38382492	T	C	0.4036	3.046e-10	0.4025	0.0639	1	rs2504142	1	ZNF37A	0	upstream	4.347	7	1	15
rs2472175	10	38382901	T	G	0.4036	3.046e-10	-0.4025	0.0639	1	rs2504142	1	ZNF37A	0	upstream	5.573	4	1	1
rs2472176	10	38382921	T	C	0.4036	2.977e-10	-0.4028	0.0639	1	rs2504142	1	ZNF37A	0	upstream	2.87	2b	1	1
rs2474568	10	38383147	A	T	0.4036	3.004e-10	-0.4027	0.0639	1	rs2504142	1	ZNF37A	0	upstream	2.663	1f	1	1
rs66842526	10	38383280	C	CT	0.3917	NA	NA	NA	0.948277	rs2504142	1	ZNF37A	0	UTR5	NA	NA	1	1
rs371424835	10	38383286	C	G	0.3797	NA	NA	NA	0.899005	rs2504142	1	ZNF37A	0	UTR5	2.575	4	1	1
rs377219439	10	38383288	A	C	0.3797	NA	NA	NA	0.899005	rs2504142	1	ZNF37A	0	UTR5	3.522	4	1	1
rs2983343	10	38383332	A	G	0.4036	3.018e-10	-0.4026	0.0639	1	rs2504142	1	ZNF37A	0	UTR5	0.826	3a	1	1
rs2474569	10	38383491	C	G	0.4036	3.087e-10	-0.4024	0.0639	1	rs2504142	1	ZNF37A	0	intronic	5.332	4	1	1
rs2504143	10	38383706	T	C	0.4036	3.004e-10	0.4027	0.0639	1	rs2504142	1	ZNF37A	0	intronic	7.554	NA	1	1
rs2474570	10	38383757	T	C	0.4901	1.439e-06	-0.3055	0.0634	0.74127	rs289638	1	ZNF37A	0	intronic	4.485	2b	1	1
rs2504142	10	38383793	T	C	0.4036	2.016e-10	0.4085	0.0642	1	rs2504142	1	ZNF37A	0	intronic	4.382	NA	1	1
rs2472177	10	38384015	T	G	0.4095	5.327e-10	-0.3964	0.0638	0.974125	rs2504142	1	ZNF37A	0	UTR5	2.978	4	1	2
rs2474571	10	38384639	T	G	0.4036	3.707e-10	-0.401	0.064	1	rs2504142	1	ZNF37A	0	intronic	3.388	7	1	5
rs2472178	10	38384750	T	C	0.4095	4.55e-10	-0.398	0.0638	0.974125	rs2504142	1	ZNF37A	0	intronic	0.263	5	1	5
rs2472179	10	38384848	T	C	0.4901	1.124e-06	-0.3154	0.0648	0.74127	rs289638	1	ZNF37A	0	intronic	1.048	7	3	5
rs2474572	10	38385316	A	G	0.4095	4.823e-10	-0.3972	0.0638	0.974125	rs2504142	1	ZNF37A	0	intronic	0.521	6	3	4
rs2474573	10	38385441	A	G	0.4901	1.636e-06	0.3032	0.0632	0.74127	rs289638	1	ZNF37A	0	intronic	7.92	7	3	4
rs2472180	10	38386506	C	T	0.4036	NA	NA	NA	1	rs2504142	1	ZNF37A	0	intronic	3.494	7	4	4
rs2504141	10	38386691	A	G	0.4901	1.726e-06	-0.3025	0.0632	0.74127	rs289638	1	ZNF37A	0	intronic	2.232	NA	4	4
rs2472181	10	38386764	T	C	0.4036	3.049e-10	-0.4023	0.0639	1	rs2504142	1	ZNF37A	0	intronic	2.9	5	4	4
rs66899031	10	38386808	A	C	0.175	1.582e-08	-0.5047	0.0893	0.746859	rs2472160	1	ZNF37A	0	intronic	6.788	5	4	4
rs2474574	10	38387295	T	C	0.4036	3.063e-10	0.4023	0.0639	1	rs2504142	1	ZNF37A	0	intronic	3.796	5	4	4
rs2504140	10	38387579	T	G	0.4036	3.063e-10	-0.4023	0.0639	1	rs2504142	1	ZNF37A	0	intronic	11.39	NA	4	4
rs60793652	10	38387783	A	G	0.175	1.578e-08	-0.5047	0.0893	0.746859	rs2472160	1	ZNF37A	0	intronic	8.746	6	4	4
rs112673754	10	38387814	GCATTGTAATGAGTA	G	0.4891	NA	NA	NA	0.737599	rs289638	1	ZNF37A	0	intronic	9.109	NA	4	5
rs2474575	10	38387901	T	C	0.4036	3.049e-10	0.4023	0.0639	1	rs2504142	1	ZNF37A	0	intronic	2.514	5	4	5
rs2504139	10	38388321	A	G	0.4901	1.696e-06	-0.3027	0.0632	0.74127	rs289638	1	ZNF37A	0	intronic	2.028	NA	4	5
rs72793759	10	38388577	A	G	0.169	3.644e-08	0.5057	0.0918	0.733778	rs2472160	1	ZNF37A	0	intronic	8.022	6	4	5
rs2472182	10	38388865	T	C	0.4036	3.063e-10	-0.4023	0.0639	1	rs2504142	1	ZNF37A	0	intronic	4.141	5	4	5
rs2384730	10	38389805	C	A	0.4036	NA	NA	NA	1	rs2504142	1	ZNF37A	0	intronic	6.895	7	4	5
rs2263162	10	38389847	A	G	0.4901	NA	NA	NA	0.74127	rs289638	1	ZNF37A	0	intronic	2.105	7	4	5
rs2263163	10	38389887	A	G	0.4046	3.063e-10	0.4023	0.0639	0.99559	rs2504142	1	ZNF37A	0	intronic	2.486	7	4	5
rs2263164	10	38389898	T	C	0.4911	1.644e-06	-0.3032	0.0633	0.737248	rs289638	1	ZNF37A	0	intronic	1.674	7	4	5
rs35151327	10	38390277	A	AT	0.4254	NA	NA	NA	0.864274	rs2504142	1	ZNF37A	0	intronic	NA	NA	4	5
rs35103940	10	38390515	CT	C	0.3797	NA	NA	NA	0.881707	rs2504142	1	ZNF37A	0	intronic	NA	NA	4	5
rs2384731	10	38390745	C	A	0.4901	NA	NA	NA	0.74127	rs289638	1	ZNF37A	0	intronic	NA	6	4	5
rs2504133	10	38391376	A	C	0.2485	1.814e-08	-0.4224	0.075	0.735877	rs1535273	1	ZNF37A	0	intronic	1.513	NA	4	5
rs2178962	10	38391563	C	G	0.4901	1.678e-06	0.3028	0.0632	0.74127	rs289638	1	ZNF37A	0	intronic	0.392	7	4	8
rs2021650	10	38391917	T	C	0.4901	1.678e-06	0.3028	0.0632	0.74127	rs289638	1	ZNF37A	0	intronic	2.862	NA	4	8
rs2021649	10	38392122	T	C	0.4036	3.249e-10	0.4017	0.0639	1	rs2504142	1	ZNF37A	0	intronic	2.548	NA	4	8
rs2504127	10	38392393	C	G	0.4901	1.676e-06	-0.3028	0.0632	0.74127	rs289638	1	ZNF37A	0	intronic	8.239	6	4	8
rs2472183	10	38392495	G	T	0.4036	NA	NA	NA	1	rs2504142	1	ZNF37A	0	intronic	0.115	6	4	8
rs2505198	10	38393183	A	C	0.4095	5.881e-10	-0.3961	0.064	0.974125	rs2504142	1	ZNF37A	0	intronic	3.786	NA	4	8
rs2505197	10	38393310	T	C	0.4036	3.119e-10	-0.4021	0.0639	1	rs2504142	1	ZNF37A	0	intronic	2.633	NA	4	8
rs2983344	10	38393386	T	G	0.4016	NA	NA	NA	0.9912	rs2504142	1	ZNF37A	0	intronic	0.79	5	4	8
rs2983345	10	38393393	T	G	0.4036	NA	NA	NA	1	rs2504142	1	ZNF37A	0	intronic	0.082	5	4	8
rs2505196	10	38393563	A	G	0.4036	3.187e-10	0.4021	0.0639	1	rs2504142	1	ZNF37A	0	intronic	9.017	NA	4	8
rs2505195	10	38393838	T	C	0.4036	3.242e-10	-0.4021	0.064	1	rs2504142	1	ZNF37A	0	intronic	2.206	NA	4	8
rs2505194	10	38393881	T	C	0.4036	3.105e-10	0.4021	0.0639	1	rs2504142	1	ZNF37A	0	intronic	9.6	NA	4	8
rs143072280	10	38393931	TTTTC	T	0.3509	NA	NA	NA	0.793221	rs2504142	1	ZNF37A	0	intronic	0.351	NA	4	8
rs2504121	10	38394586	T	G	0.4901	NA	NA	NA	0.74127	rs289638	1	ZNF37A	0	intronic	0.787	NA	4	8
rs2505193	10	38394638	C	G	0.4036	3.133e-10	0.4021	0.0639	1	rs2504142	1	ZNF37A	0	intronic	0.074	7	4	8
rs2504120	10	38394642	T	C	0.4901	1.345e-06	-0.3061	0.0633	0.74127	rs289638	1	ZNF37A	0	intronic	0.297	NA	4	8
rs34718983	10	38394900	A	AT	0.4095	NA	NA	NA	0.974125	rs2504142	1	ZNF37A	0	intronic	NA	NA	4	8
rs2505191	10	38395315	A	G	0.4036	3.133e-10	0.4021	0.0639	1	rs2504142	1	ZNF37A	0	intronic	4.29	NA	4	8
rs2505190	10	38396194	T	C	0.4901	1.592e-06	-0.3037	0.0633	0.74127	rs289638	1	ZNF37A	0	intronic	0.13	7	4	9
rs2505189	10	38396817	T	C	0.4036	3.47e-10	-0.4029	0.0642	1	rs2504142	1	ZNF37A	0	intronic	0.96	NA	5	9
rs35894133	10	38396903	C	CT	0.4036	NA	NA	NA	1	rs2504142	1	ZNF37A	0	intronic	7.461	NA	5	9
rs2505188	10	38397614	T	C	0.4036	3.004e-10	-0.4027	0.0639	1	rs2504142	1	ZNF37A	0	intronic	4.111	7	5	9
rs2505187	10	38397970	T	C	0.4036	3.133e-10	0.4021	0.0639	1	rs2504142	1	ZNF37A	0	intronic	4.353	6	5	9
rs2505186	10	38398029	T	C	0.4036	3.133e-10	0.4021	0.0639	1	rs2504142	1	ZNF37A	0	intronic	0.292	7	5	9
rs2474579	10	38398381	T	C	0.4036	2.731e-10	0.4036	0.0639	1	rs2504142	1	ZNF37A	0	intronic	1.474	7	5	9
rs2474580	10	38398713	A	G	0.4036	3.119e-10	0.4021	0.0639	1	rs2504142	1	ZNF37A	0	intronic	1.072	7	5	9
rs78288099	10	38399176	T	C	0.4901	NA	NA	NA	0.74127	rs289638	1	ZNF37A	0	intronic	2.547	6	5	9
rs9417297	10	38399602	T	A	0.4036	NA	NA	NA	1	rs2504142	1	ZNF37A	0	intronic	4.234	7	5	9
rs11011452	10	38399848	A	G	0.4036	NA	NA	NA	1	rs2504142	1	ZNF37A	0	intronic	8.755	7	5	9
rs176876	10	38400050	C	G	0.4901	1.429e-06	0.3051	0.0633	0.74127	rs289638	1	ZNF37A	0	intronic	0.027	7	5	9
rs176877	10	38400154	A	C	0.4036	NA	NA	NA	1	rs2504142	1	ZNF37A	0	intronic	13.19	7	5	9
rs2504149	10	38400178	T	G	0.4036	NA	NA	NA	1	rs2504142	1	ZNF37A	0	intronic	0.363	7	5	9
rs2474581	10	38400223	A	G	0.4095	4.892e-10	-0.3974	0.0639	0.974125	rs2504142	1	ZNF37A	0	intronic	1.582	7	5	9
rs176878	10	38400266	T	G	0.4901	1.612e-06	-0.3033	0.0632	0.74127	rs289638	1	ZNF37A	0	intronic	4.435	6	5	9
rs2504148	10	38400788	A	G	0.4036	3.147e-10	-0.402	0.0639	1	rs2504142	1	ZNF37A	0	intronic	12.17	NA	4	9
rs35729359	10	38400842	CTT	C	0.3718	NA	NA	NA	0.874926	rs2504142	1	ZNF37A	0	intronic	10.9	NA	4	9
rs35812511	10	38401075	TA	T	0.4036	NA	NA	NA	1	rs2504142	1	ZNF37A	0	intronic	0.085	NA	4	9
rs176879	10	38401284	T	G	0.4901	1.582e-06	-0.3034	0.0632	0.74127	rs289638	1	ZNF37A	0	intronic	4.533	5	4	9
rs176880	10	38401417	C	G	0.4036	3.133e-10	-0.4021	0.0639	1	rs2504142	1	ZNF37A	0	intronic	2.793	5	4	9
rs176881	10	38401795	C	G	0.4036	NA	NA	NA	1	rs2504142	1	ZNF37A	0	intronic	4.845	6	4	9
rs176882	10	38401880	C	T	0.4901	NA	NA	NA	0.74127	rs289638	1	ZNF37A	0	intronic	0.505	7	4	9
rs176885	10	38402789	A	G	0.4901	1.594e-06	-0.3033	0.0632	0.74127	rs289638	1	ZNF37A	0	intronic	1.87	7	4	8
rs176886	10	38403974	T	C	0.4036	3.119e-10	0.4021	0.0639	1	rs2504142	1	ZNF37A	0	intronic	4.191	7	4	8
rs176887	10	38406094	T	C	0.4036	3.077e-10	-0.4022	0.0639	1	rs2504142	1	ZNF37A	0	intronic	5.552	7	4	8
rs176889	10	38407519	A	G	0.4901	1.612e-06	-0.3032	0.0632	0.74127	rs289638	1	ZNF37A	0	exonic	0.503	5	4	8
rs75525219	10	38407885	GAAA	G	0.4036	NA	NA	NA	1	rs2504142	1	ZNF37A	0	UTR3	3.838	NA	5	8
rs11321804	10	38409357	C	CA	0.4911	NA	NA	NA	0.737248	rs289638	1	ZNF37A	0	UTR3	NA	NA	5	9
rs176890	10	38410108	C	G	0.2485	1.302e-08	-0.4277	0.0752	0.735877	rs1535273	1	ZNF37A	0	UTR3	3.953	7	5	9
rs1813028	10	38412711	A	G	0.4006	4.15e-10	-0.3995	0.0639	0.98686	rs2504142	1	ZNF37A	0	UTR3	1.236	NA	5	9
rs1138252	10	38413112	A	G	0.4901	1.657e-06	0.3029	0.0632	0.74127	rs289638	1	ZNF37A	0	UTR3	3.136	6	5	9
rs58109635	10	38413167	TCA	T	0.4901	NA	NA	NA	0.74127	rs289638	1	ZNF37A	0	UTR3	8.755	NA	5	9
rs2008449	10	38414204	A	T	0.4095	5.184e-10	-0.3965	0.0638	0.974125	rs2504142	1	ZNF37A	0	UTR3	3.336	7	5	9
rs2505179	10	38415131	A	G	0.4911	1.645e-06	0.303	0.0632	0.738073	rs289638	1	ZNF37A	0	downstream	1.832	NA	4	9
rs67385632	10	38415200	T	C	0.2485	1.759e-08	-0.422	0.0749	0.735877	rs1535273	1	ZNF37A	0	downstream	3.353	6	4	9
rs2474584	10	38416389	T	C	0.4036	2.913e-10	0.4028	0.0639	1	rs2504142	1	ZNF37A	1917	intergenic	0.704	6	4	9
rs1548255	10	38417193	T	C	0.4036	3.342e-10	-0.4014	0.0639	1	rs2504142	1	ZNF37A	2721	intergenic	2.405	7	4	9
rs2474586	10	38418882	T	C	0.4036	2.926e-10	-0.4027	0.0639	1	rs2504142	1	ZNF37A	4410	intergenic	1.067	6	5	9
rs2505260	10	38419520	T	C	0.4036	2.86e-10	0.403	0.0639	1	rs2504142	1	ZNF37A	5048	intergenic	12.98	NA	5	9
rs2474587	10	38420666	T	C	0.4006	4.112e-10	0.3996	0.0639	0.98686	rs2504142	1	ENSG00000272983	5599	intergenic	0.085	7	5	15
rs2474588	10	38420870	A	G	0.4006	4.112e-10	-0.3996	0.0639	0.98686	rs2504142	1	ENSG00000272983	5395	intergenic	8.51	5	5	15
rs2505259	10	38422886	A	G	0.4095	3.498e-10	0.4014	0.064	0.974125	rs2504142	1	ENSG00000272983	3379	intergenic	9.807	NA	5	15
rs2474590	10	38422911	T	C	0.4036	2.368e-10	-0.4054	0.064	1	rs2504142	1	ENSG00000272983	3354	intergenic	11.64	6	5	15
rs2474591	10	38423153	T	C	0.4901	9.393e-07	0.3135	0.0639	0.74127	rs289638	1	ENSG00000272983	3112	intergenic	2.721	6	5	15
rs7913645	10	38424444	A	C	0.175	2.479e-08	-0.5055	0.0907	0.746859	rs2472160	1	ENSG00000272983	1821	intergenic	8.267	7	5	15
rs2505258	10	38425765	T	C	0.4901	1.503e-06	0.3041	0.0632	0.74127	rs289638	1	ENSG00000272983	0	upstream	3.097	NA	5	9
rs2474594	10	38426661	C	G	0.4036	3.073e-10	0.4024	0.0639	1	rs2504142	1	ENSG00000272983	0	ncRNA_exonic	0.128	5	4	15
rs2474595	10	38426782	C	G	0.4046	3.187e-10	0.4021	0.0639	0.99559	rs2504142	1	ENSG00000272983	0	ncRNA_exonic	0.928	7	4	15
rs2474596	10	38426832	T	C	0.4901	1.509e-06	-0.3041	0.0632	0.74127	rs289638	1	ENSG00000272983	0	ncRNA_exonic	0.663	7	5	15
rs59251750	10	38427568	A	G	0.2485	1.574e-08	0.4229	0.0748	0.735877	rs1535273	1	ENSG00000272983	0	ncRNA_exonic	10.72	6	5	15
rs1329786	10	38427764	C	G	0.4901	1.516e-06	0.3042	0.0632	0.74127	rs289638	1	ENSG00000272983	0	ncRNA_exonic	1.604	5	5	15
rs2474597	10	38427997	T	C	0.4901	1.49e-06	0.3078	0.064	0.74127	rs289638	1	ENSG00000272983	0	ncRNA_exonic	6.811	7	4	15
rs2474598	10	38430296	T	C	0.4036	2.977e-10	-0.4028	0.0639	1	rs2504142	1	ENSG00000272983	0	ncRNA_exonic	2.03	5	5	15
rs68103671	10	38430774	A	G	0.2485	1.453e-08	-0.4239	0.0748	0.735877	rs1535273	1	ENSG00000272983	0	ncRNA_exonic	2.843	7	5	15
rs11011461	10	38431427	A	G	0.4036	3.087e-10	0.4024	0.0639	1	rs2504142	1	ENSG00000272983	0	ncRNA_exonic	2.721	7	5	15
rs1985707	10	38434098	T	C	0.4036	3.183e-10	0.4023	0.064	1	rs2504142	1	ENSG00000272983	0	downstream	1.965	NA	5	15
rs11308253	10	38434144	G	GA	0.4891	NA	NA	NA	0.738422	rs289638	1	ENSG00000272983	0	downstream	0.191	NA	5	15
rs1854563	10	38434961	A	G	0.4036	3.154e-10	0.4024	0.064	1	rs2504142	1	ENSG00000272983	1634	intergenic	1.451	NA	5	15
rs2505235	10	38435523	A	T	0.4901	1.516e-06	0.3042	0.0632	0.74127	rs289638	1	ENSG00000272983	2196	intergenic	3.898	7	2	15
rs2505236	10	38435642	A	G	0.4901	1.533e-06	-0.3042	0.0633	0.74127	rs289638	1	ENSG00000272983	2315	intergenic	2.109	7	2	15
rs66704357	10	38437591	A	G	0.2485	1.341e-08	0.4252	0.0748	0.735877	rs1535273	1	ENSG00000273019	1305	intergenic	0.942	6	5	15
rs67022688	10	38438872	T	C	0.175	1.082e-08	-0.5106	0.0893	0.746859	rs2472160	1	ENSG00000273019	0	upstream	0.753	6	5	15
rs2505237	10	38438898	T	G	0.4036	3.097e-10	-0.4026	0.064	1	rs2504142	1	ENSG00000273019	0	ncRNA_exonic	2.083	7	5	15
rs2474599	10	38438939	A	G	0.4036	3.097e-10	-0.4026	0.064	1	rs2504142	1	ENSG00000273019	0	ncRNA_exonic	2.182	7	5	15
rs2505240	10	38442419	T	G	0.4036	NA	NA	NA	1	rs2504142	1	ENSG00000273019	3198	intergenic	0.734	2b	7	15
rs2505241	10	38442421	C	T	0.4036	NA	NA	NA	1	rs2504142	1	ENSG00000273019	3200	intergenic	1.292	2b	7	15
rs2505242	10	38444606	A	T	0.4911	1.35e-06	-0.3064	0.0634	0.738073	rs289638	1	ENSG00000273019	5385	intergenic	1.069	6	9	15
rs2505243	10	38445002	A	G	0.4891	9.241e-07	-0.3115	0.0635	0.738422	rs289638	1	ENSG00000225965	5496	intergenic	2.85	7	9	15
rs7088655	10	38447936	T	C	0.2485	1.784e-08	-0.4223	0.075	0.735877	rs1535273	1	ENSG00000225965	2562	intergenic	6.667	5	9	9
rs6482060	10	38450856	C	G	0.4891	1.082e-06	-0.3091	0.0634	0.738422	rs289638	1	ENSG00000225965	0	downstream	NA	6	5	15
rs2224248	10	38451886	A	G	0.4036	3.631e-10	-0.4023	0.0642	1	rs2504142	1	ENSG00000225965	1209	intergenic	0.106	6	5	15
rs1854562	10	38452054	T	C	0.2485	1.422e-08	0.4265	0.0752	0.735877	rs1535273	1	ENSG00000225965	1377	intergenic	3.806	NA	5	15
rs112277959	10	38453275	A	G	0.169	1.904e-08	-0.5206	0.0926	0.733778	rs2472160	1	ENSG00000241125	0	upstream	1.177	6	5	15
rs72793785	10	38453288	A	G	0.169	1.904e-08	-0.5206	0.0926	0.733778	rs2472160	1	ENSG00000241125	0	upstream	0.004	7	5	15
rs72793786	10	38453454	T	C	0.169	3.25e-08	0.5114	0.0925	0.733778	rs2472160	1	ENSG00000241125	0	upstream	3.258	7	5	15
rs2384732	10	38454921	A	G	0.175	9.571e-09	-0.5114	0.0891	0.746859	rs2472160	1	ENSG00000241125	0	ncRNA_exonic	1.879	7	5	15
rs2505244	10	38456047	A	G	0.4771	1.084e-05	-0.2854	0.0649	0.634213	rs289638	1	ENSG00000241125	0	ncRNA_intronic	1.961	7	5	15
rs2180412	10	38456117	A	G	0.4036	3.342e-10	0.4027	0.0641	1	rs2504142	1	ENSG00000241125	0	ncRNA_intronic	8.569	6	5	15
rs2144859	10	38456299	C	G	0.4891	1.107e-06	-0.309	0.0634	0.738422	rs289638	1	ENSG00000241125	0	ncRNA_intronic	6.338	6	5	15
rs2474608	10	38457109	T	C	0.4036	3.353e-10	0.4029	0.0641	1	rs2504142	1	ENSG00000241125	0	ncRNA_intronic	5.02	6	9	15
rs2474609	10	38457324	T	C	0.4901	1.329e-06	-0.3068	0.0635	0.74127	rs289638	1	ENSG00000241125	0	ncRNA_intronic	1.085	6	9	15
rs1998062	10	38457652	C	G	0.4036	3.353e-10	0.4029	0.0641	1	rs2504142	1	ENSG00000241125	0	ncRNA_intronic	0.611	5	5	15
rs55904726	10	38458993	A	G	0.2475	6.897e-08	-0.4063	0.0753	0.730563	rs1535273	1	ENSG00000241125	0	ncRNA_intronic	8.517	6	5	15
rs2505248	10	38459097	A	G	0.4046	3.472e-10	-0.4027	0.0642	0.995617	rs2504142	1	ENSG00000241125	0	ncRNA_intronic	2.027	7	5	15
rs2474610	10	38459119	C	G	0.4911	1.343e-06	0.3067	0.0635	0.738073	rs289638	1	ENSG00000241125	0	ncRNA_intronic	0.622	6	5	15
rs2505249	10	38459273	A	G	0.4901	1.359e-06	-0.3067	0.0635	0.74127	rs289638	1	ENSG00000241125	0	ncRNA_intronic	0.523	7	5	15
rs2505250	10	38459422	A	G	0.4891	1.143e-06	-0.309	0.0635	0.738422	rs289638	1	ENSG00000241125	0	ncRNA_intronic	0.891	6	5	15
rs2505251	10	38460207	T	C	0.4901	1.376e-06	-0.3065	0.0635	0.74127	rs289638	1	ENSG00000241125	0	ncRNA_intronic	0.323	6	5	15
rs2505252	10	38460230	T	C	0.4891	1.025e-06	0.3102	0.0635	0.738422	rs289638	1	ENSG00000241125	0	ncRNA_intronic	1.282	7	5	15
rs1854560	10	38461675	C	G	0.4901	1.834e-06	0.3035	0.0636	0.74127	rs289638	1	ENSG00000241125	0	ncRNA_intronic	0.826	5	9	15
rs67832734	10	38462648	A	C	0.1899	1.325e-09	0.5172	0.0853	0.851121	rs2472160	1	ENSG00000241125	0	ncRNA_intronic	5.939	7	9	15
rs2474554	10	38464886	T	C	0.4742	1.983e-05	-0.2711	0.0635	0.678991	rs289638	1	ENSG00000224761	0	ncRNA_exonic	0.319	NA	7	15
rs36102891	10	38465943	GA	G	0.2346	NA	NA	NA	0.63473	rs1535273	1	ENSG00000241125:ENSG00000224761	0	ncRNA_intronic:ncRNA_intronic	NA	NA	7	15
rs2474556	10	38466329	C	G	0.4742	1.94e-05	-0.2716	0.0636	0.678991	rs289638	1	ENSG00000224761:ENSG00000241125	0	ncRNA_intronic:ncRNA_intronic	1.137	5	9	15
rs5784566	10	38466544	CTT	C	0.4453	NA	NA	NA	0.68444	rs2504142	1	ENSG00000224761:ENSG00000241125	0	ncRNA_intronic:ncRNA_intronic	3.404	NA	9	15
rs9337568	10	38468245	C	CT	0.4125	NA	NA	NA	0.796959	rs2504142	1	ENSG00000224761	0	ncRNA_intronic	NA	NA	9	15
rs1411172	10	38469114	A	G	0.4742	1.854e-05	0.2729	0.0637	0.678991	rs289638	1	ENSG00000224761	0	ncRNA_intronic	5.697	NA	9	15
rs58370123	10	38469984	A	G	0.174	2.581e-08	0.4997	0.0897	0.725423	rs2472160	1	ENSG00000224761	0	ncRNA_intronic	8.998	7	9	15
rs2505202	10	38471139	T	C	0.4732	2.415e-05	-0.2696	0.0639	0.676569	rs289638	1	ENSG00000224761	0	ncRNA_intronic	1.282	5	9	15
rs2505203	10	38471222	C	G	0.4742	2.73e-05	0.2677	0.0638	0.678991	rs289638	1	ENSG00000224761	0	ncRNA_intronic	0.329	6	9	15
rs2505204	10	38471597	T	G	0.3847	1.315e-08	0.369	0.0649	0.911842	rs2504142	1	ENSG00000224761	0	ncRNA_intronic	0.08	5	9	15
rs2505205	10	38471665	C	G	0.4722	2.654e-05	0.2686	0.0639	0.674176	rs289638	1	ENSG00000224761	0	ncRNA_intronic	0.019	6	9	15
rs9340022	10	38471668	A	G	0.4712	2.729e-05	-0.2686	0.064	0.671811	rs289638	1	ENSG00000224761	0	ncRNA_intronic	1.582	6	9	15
rs1831317	10	38473260	A	G	0.4732	1.629e-05	0.2751	0.0638	0.676569	rs289638	1	ENSG00000224761	0	ncRNA_intronic	1.082	NA	9	15
rs1831315	10	38473353	T	C	0.3847	1.389e-08	-0.3681	0.0649	0.911842	rs2504142	1	ENSG00000224761	0	ncRNA_intronic	11.95	NA	9	15
rs1831314	10	38473549	T	C	0.159	3.702e-07	-0.49	0.0964	0.628641	rs2472160	1	ENSG00000224761	0	ncRNA_intronic	1.396	NA	9	15
rs7901605	10	38474008	A	C	0.4742	1.932e-05	0.2726	0.0638	0.678991	rs289638	1	ENSG00000224761	0	ncRNA_intronic	NA	6	9	15
rs2505209	10	38474589	A	G	0.4742	1.756e-05	0.2742	0.0639	0.678991	rs289638	1	ENSG00000224761	0	ncRNA_intronic	NA	6	9	15
rs2077456	10	38475621	A	G	0.4742	1.951e-05	0.2725	0.0638	0.678991	rs289638	1	ENSG00000236309	0	ncRNA_exonic	3.518	7	9	15
rs2505210	10	38477180	A	G	0.4742	1.932e-05	-0.2726	0.0638	0.678991	rs289638	1	ENSG00000224761	0	ncRNA_intronic	0.788	7	9	15
rs2505211	10	38477807	T	C	0.4742	2.158e-05	-0.2717	0.064	0.678991	rs289638	1	ENSG00000224761	0	ncRNA_intronic	1.142	7	9	15
rs75847328	10	38478970	A	G	0.3877	NA	NA	NA	0.92379	rs2504142	1	ENSG00000224761	0	ncRNA_intronic	0.091	7	9	15
rs112202783	10	38479130	A	G	0.4732	NA	NA	NA	0.676569	rs289638	1	ENSG00000224761	0	ncRNA_intronic	7.582	7	9	15
rs75959290	10	38479207	T	G	0.3877	NA	NA	NA	0.92379	rs2504142	1	ENSG00000224761	0	ncRNA_intronic	1.112	6	9	15
rs7080288	10	38479897	A	G	0.2326	5.189e-07	0.3895	0.0776	0.644657	rs1535273	1	ENSG00000224761	0	ncRNA_intronic	1.673	7	9	15
rs2103937	10	38480478	A	G	0.4742	1.789e-05	-0.2739	0.0639	0.678991	rs289638	1	ENSG00000224761	0	ncRNA_intronic	2.287	7	9	15
rs2505215	10	38481273	A	G	0.3877	3.177e-08	-0.3574	0.0646	0.92379	rs2504142	1	ENSG00000224761	0	ncRNA_intronic	2.938	7	9	15
rs2505216	10	38482830	T	C	0.3877	8.673e-09	-0.3729	0.0648	0.92379	rs2504142	1	ENSG00000224761	0	ncRNA_intronic	3.188	6	9	15
rs2800550	10	38482929	T	C	0.3877	4.117e-08	-0.3546	0.0646	0.92379	rs2504142	1	ENSG00000224761	0	ncRNA_intronic	2.757	NA	9	15
rs2800549	10	38483036	A	G	0.4742	8.636e-05	-0.2529	0.0644	0.678991	rs289638	1	ENSG00000224761	0	ncRNA_intronic	1.706	NA	9	15
rs1740730	10	38484889	T	C	0.4742	4.895e-05	0.2582	0.0636	0.678991	rs289638	1	ENSG00000224761	0	ncRNA_intronic	5.995	7	9	15
rs1780130	10	38485378	A	T	0.3847	4.694e-08	0.3532	0.0647	0.911842	rs2504142	1	ENSG00000224761	0	ncRNA_intronic	4.619	6	9	15
rs1780129	10	38485626	T	C	0.4742	1.659e-05	0.2751	0.0639	0.678991	rs289638	1	ENSG00000224761	0	ncRNA_intronic	4.306	NA	9	15
rs1740731	10	38486059	A	G	0.4742	3.392e-05	0.2664	0.0643	0.678991	rs289638	1	ENSG00000224761	0	ncRNA_intronic	1.132	6	9	15
rs2474558	10	38486141	A	C	0.334	8.18e-09	0.3887	0.0674	0.670105	rs2504142	1	ENSG00000224761	0	ncRNA_intronic	4.64	5	9	15
rs55885361	10	38486529	A	G	0.174	1.718e-07	0.4663	0.0892	0.725423	rs2472160	1	ENSG00000224761	0	ncRNA_intronic	0.188	6	9	15
rs2749611	10	38487552	T	G	0.3926	1.116e-08	0.3694	0.0647	0.902064	rs2504142	1	ENSG00000224761	0	ncRNA_intronic	3.196	7	9	15
rs2749612	10	38488610	A	G	0.3877	3.057e-08	0.3579	0.0646	0.92379	rs2504142	1	ENSG00000224761	0	ncRNA_intronic	5.377	6	9	15
rs1740732	10	38491385	T	C	0.3936	6.276e-08	0.3492	0.0645	0.897575	rs2504142	1	ENSG00000224761	0	ncRNA_intronic	10.36	7	9	15
rs1780131	10	38491932	T	G	0.4742	4.664e-05	-0.2589	0.0636	0.678991	rs289638	1	ENSG00000224761	0	ncRNA_intronic	0.365	NA	9	15
rs1740733	10	38492377	T	C	0.4742	4.665e-05	0.2588	0.0636	0.678991	rs289638	1	ENSG00000224761	0	ncRNA_intronic	2.449	5	9	15
rs59623126	10	38492760	A	G	0.175	1.666e-07	-0.4667	0.0892	0.719277	rs2472160	1	ENSG00000224761	0	ncRNA_intronic	5.746	5	8	9
rs2103938	10	38493998	T	G	0.3936	1.358e-08	-0.367	0.0646	0.897575	rs2504142	1	ENSG00000224761	0	ncRNA_intronic	4.112	6	9	15
rs1740734	10	38494194	T	C	0.3936	1.353e-08	-0.367	0.0646	0.897575	rs2504142	1	ENSG00000224761	0	ncRNA_intronic	1.507	7	9	15
rs138283829	10	38494438	A	AAC	0.3887	NA	NA	NA	0.919178	rs2504142	1	ENSG00000224761	0	ncRNA_intronic	1.472	NA	9	15
rs1780132	10	38494899	A	T	0.2336	1.291e-06	0.3732	0.0771	0.639675	rs1535273	1	ENSG00000224761	0	ncRNA_intronic	10	6	9	15
rs35288690	10	38496787	G	GA	0.4742	NA	NA	NA	0.678991	rs289638	1	ENSG00000224761	0	ncRNA_intronic	3.633	NA	9	15
rs67148165	10	38496816	C	G	0.16	1.939e-06	0.4635	0.0974	0.622541	rs2472160	1	ENSG00000224761	0	ncRNA_intronic	0.314	7	9	15
rs1621040	10	38497232	C	T	0.3936	NA	NA	NA	0.897575	rs2504142	1	ENSG00000224761	0	ncRNA_intronic	1.194	5	9	15
rs35231776	10	38497354	T	TA	0.4742	NA	NA	NA	0.678991	rs289638	1	ENSG00000224761	0	ncRNA_intronic	3.023	NA	9	15
rs1740735	10	38497777	A	C	0.3936	1.176e-08	-0.3686	0.0646	0.897575	rs2504142	1	ENSG00000224761	0	ncRNA_intronic	5.087	7	9	15
rs35292286	10	38498329	T	TAA	0.3887	NA	NA	NA	0.919178	rs2504142	1	ENSG00000224761	0	ncRNA_intronic	8.523	NA	9	15
rs1740736	10	38498909	A	G	0.4742	4.19e-05	-0.2607	0.0636	0.678991	rs289638	1	ENSG00000224761	0	ncRNA_intronic	1.855	5	9	15
rs1740737	10	38499365	T	G	0.3887	8.336e-09	0.3732	0.0648	0.919178	rs2504142	1	ENSG00000224761	0	ncRNA_intronic	4.858	NA	9	15
rs1780133	10	38499509	T	C	0.3956	1.361e-08	-0.3672	0.0647	0.888652	rs2504142	1	ENSG00000224761	0	ncRNA_intronic	0.938	NA	9	15
rs1780134	10	38499523	A	G	0.4751	4.79e-05	-0.2589	0.0637	0.675896	rs289638	1	ENSG00000224761	0	ncRNA_intronic	0.793	NA	9	15
rs1780135	10	38501155	A	G	0.4742	1.709e-05	-0.2745	0.0638	0.678991	rs289638	1	ENSG00000224761	0	ncRNA_intronic	1.936	7	9	15
rs1780136	10	38501453	A	G	0.3936	4.288e-08	-0.3565	0.0651	0.897575	rs2504142	1	ENSG00000224761	0	downstream	4.169	5	9	15
rs1780137	10	38501475	C	G	0.3877	3.904e-08	-0.3555	0.0647	0.914962	rs2504142	1	ENSG00000224761	0	downstream	NA	5	9	15
rs1780138	10	38501654	A	G	0.3936	4.552e-08	-0.3528	0.0645	0.897575	rs2504142	1	ENSG00000224761	0	downstream	7.924	6	9	15
rs1614236	10	38502996	T	C	0.3887	1.083e-08	0.3707	0.0648	0.919178	rs2504142	1	ENSG00000224761	1711	intergenic	2.058	5	9	15
rs1780139	10	38503018	T	C	0.3936	1.291e-08	0.3681	0.0647	0.897575	rs2504142	1	ENSG00000224761	1733	intergenic	1.564	5	9	15
rs570057659	10	38503454	C	CTT	0.3867	NA	NA	NA	0.91106	rs2504142	1	ENSG00000224761	2169	intergenic	8.158	NA	9	15
rs111240872	10	38503659	A	T	0.16	2.134e-06	-0.4624	0.0975	0.622541	rs2472160	1	ENSG00000224761	2374	intergenic	3.344	7	9	15
rs1780141	10	38504299	T	C	0.3936	1.312e-08	-0.368	0.0647	0.897575	rs2504142	1	ENSG00000224761	3014	intergenic	1.963	6	9	15
rs1780142	10	38505295	A	G	0.3936	4.225e-08	0.3541	0.0646	0.897575	rs2504142	1	ENSG00000224761	4010	intergenic	2.255	7	9	15
rs7090978	10	38505552	A	G	0.16	4.311e-07	0.4977	0.0985	0.622541	rs2472160	1	ENSG00000224761	4267	intergenic	1.817	7	9	15
rs1780143	10	38505711	G	A	0.4742	NA	NA	NA	0.678991	rs289638	1	ENSG00000224761	4426	intergenic	1.883	7	9	15
rs1780144	10	38505889	A	G	0.3887	1.15e-08	-0.3705	0.0649	0.919178	rs2504142	1	ENSG00000224761	4604	intergenic	3.975	6	9	15
rs1740738	10	38506345	T	C	0.4742	5.965e-05	-0.2568	0.064	0.678991	rs289638	1	ENSG00000224761	5060	intergenic	1.948	7	9	15
rs9418346	10	38507442	T	G	0.4742	NA	NA	NA	0.678991	rs289638	1	ENSG00000224761	6157	intergenic	NA	7	9	15
rs143821621	10	38507471	G	A	0.2336	NA	NA	NA	0.639675	rs1535273	1	ENSG00000224761	6186	intergenic	3.179	6	9	15
rs202045619	10	38508711	AT	A	0.3867	NA	NA	NA	0.911389	rs2504142	1	ENSG00000224761	7426	intergenic	0.804	NA	9	15
rs113229305	10	38508937	A	C	0.3936	NA	NA	NA	0.897575	rs2504142	1	ENSG00000224761	7652	intergenic	2.039	7	9	15
rs112822447	10	38509067	G	A	0.3857	NA	NA	NA	0.907194	rs2504142	1	ENSG00000224761	7782	intergenic	2.205	6	9	15
rs9418350	10	38509652	T	A	0.3936	NA	NA	NA	0.897575	rs2504142	1	ENSG00000224761	8367	intergenic	6.396	7	9	15
rs9418351	10	38509905	G	A	0.3936	NA	NA	NA	0.897575	rs2504142	1	ENSG00000224761	8620	intergenic	2.96	7	9	15
rs2749616	10	38510993	A	T	0.3887	1.199e-08	-0.3707	0.065	0.919178	rs2504142	1	ENSG00000224761	9708	intergenic	2.24	7	9	15
rs1740739	10	38512830	T	C	0.3936	4.122e-08	0.3561	0.0649	0.897575	rs2504142	1	ENSG00000224761	11545	intergenic	7.614	6	9	15
rs1740740	10	38513280	T	C	0.4742	2.684e-05	-0.2707	0.0645	0.678991	rs289638	1	ENSG00000224761	11995	intergenic	2.248	5	9	15
rs1740741	10	38515334	T	C	0.3936	1.463e-08	0.3681	0.065	0.897575	rs2504142	1	ENSG00000224761	14049	intergenic	1.941	6	9	15
rs2057228	10	38515766	C	T	0.3936	NA	NA	NA	0.897575	rs2504142	1	ENSG00000224761	14481	intergenic	0.518	5	9	15
rs2180411	10	38516259	T	C	0.16	2.021e-07	0.5033	0.0968	0.622541	rs2472160	1	ENSG00000224761	14974	intergenic	2.298	6	9	15
rs369995642	10	38517614	CTGGG	C	0.16	NA	NA	NA	0.622541	rs2472160	1	ENSG00000224761	16329	intergenic	NA	NA	9	15
rs552723391	10	38517617	TTTCTAG	T	0.16	NA	NA	NA	0.622541	rs2472160	1	ENSG00000224761	16332	intergenic	NA	NA	9	15
rs1780146	10	38517874	A	C	0.3887	4.757e-08	0.3548	0.065	0.919178	rs2504142	1	ENSG00000224761	16589	intergenic	0.241	7	9	15
rs1780147	10	38518302	A	G	0.4742	5.091e-05	0.2592	0.064	0.678991	rs289638	1	ENSG00000224761	17017	intergenic	0.892	6	9	15
rs1740742	10	38518860	T	C	0.3936	5.072e-08	0.3532	0.0648	0.897575	rs2504142	1	ENSG00000224761	17575	intergenic	1.29	7	9	15
rs71010406	10	38519062	AT	A	0.3936	NA	NA	NA	0.897575	rs2504142	1	ENSG00000224761	17777	intergenic	0.055	NA	9	15
rs1740743	10	38519222	T	C	0.3936	1.492e-08	0.3681	0.065	0.897575	rs2504142	1	ENSG00000226113	17628	intergenic	1.406	6	9	15
rs1740744	10	38519769	T	G	0.2336	1.683e-06	-0.3708	0.0775	0.639675	rs1535273	1	ENSG00000226113	17081	intergenic	3.777	7	9	15
rs1740745	10	38520056	T	C	0.3936	1.515e-08	-0.3681	0.065	0.897575	rs2504142	1	ENSG00000226113	16794	intergenic	2.017	6	9	15
rs1740746	10	38520191	C	T	0.3936	NA	NA	NA	0.897575	rs2504142	1	ENSG00000226113	16659	intergenic	4.413	7	9	15
rs1740747	10	38520465	A	G	0.3936	NA	NA	NA	0.897575	rs2504142	1	ENSG00000226113	16385	intergenic	3.819	5	9	15
rs1740749	10	38521646	A	G	0.3936	4.85e-08	-0.3565	0.0653	0.897575	rs2504142	1	ENSG00000226113	15204	intergenic	0.526	7	9	15
rs561743490	10	38522132	C	CT	0.4602	NA	NA	NA	0.641914	rs2504142	1	ENSG00000226113	14717	intergenic	11.6	NA	9	15
rs1780148	10	38522516	C	G	0.3926	1.388e-08	-0.3705	0.0653	0.89325	rs2504142	1	ENSG00000226113	14334	intergenic	5.358	7	9	15
rs2384736	10	38523626	A	C	0.3489	NA	NA	NA	0.746438	rs2504142	1	ENSG00000226113	13224	intergenic	1.013	6	9	15
rs2208033	10	38523726	C	A	0.4742	NA	NA	NA	0.678991	rs289638	1	ENSG00000226113	13124	intergenic	0.763	7	9	15
rs1780115	10	38524773	T	C	0.3936	6.673e-08	0.3516	0.0651	0.897575	rs2504142	1	ENSG00000226113	12077	intergenic	4.527	7	9	15
rs1740750	10	38525043	T	G	0.3887	1.13e-08	0.3735	0.0654	0.919178	rs2504142	1	ENSG00000226113	11807	intergenic	1.142	7	9	15
rs34561289	10	38525107	C	CT	0.3887	NA	NA	NA	0.919178	rs2504142	1	ENSG00000226113	11742	intergenic	1.179	NA	9	15
rs2996622	10	38525187	A	C	0.4742	2.311e-05	-0.2723	0.0643	0.678991	rs289638	1	ENSG00000226113	11663	intergenic	0.511	NA	9	15
rs35785145	10	38525622	CTT	C	0.3936	NA	NA	NA	0.897575	rs2504142	1	ENSG00000226113	11228	intergenic	9.855	NA	9	15
rs1780116	10	38526621	T	C	0.3887	1.364e-08	0.3719	0.0655	0.919178	rs2504142	1	ENSG00000226113	10229	intergenic	11.28	5	9	9
rs1780117	10	38526764	T	C	0.3857	NA	NA	NA	0.906873	rs2504142	1	ENSG00000226113	10086	intergenic	4.351	5	9	9
rs1740751	10	38526767	C	T	0.4732	NA	NA	NA	0.676569	rs289638	1	ENSG00000226113	10083	intergenic	0.248	5	9	9
rs1780118	10	38527337	C	G	0.4742	NA	NA	NA	0.678991	rs289638	1	ENSG00000226113	9513	intergenic	0.572	6	9	15
rs1780120	10	38528412	A	C	0.3887	NA	NA	NA	0.919178	rs2504142	1	ENSG00000226113	8438	intergenic	3.893	7	9	15
rs1780121	10	38529437	A	C	0.3887	6.296e-08	0.3532	0.0653	0.919178	rs2504142	1	ENSG00000226113	7413	intergenic	1.009	6	9	15
rs1780122	10	38529509	A	C	0.3887	1.479e-08	0.3703	0.0654	0.919178	rs2504142	1	ENSG00000226113	7341	intergenic	1.639	7	9	15
rs2749624	10	38529865	G	A	0.3936	NA	NA	NA	0.897575	rs2504142	1	ENSG00000226113	6985	intergenic	2.68	7	9	15
rs2749625	10	38530169	C	T	0.4742	NA	NA	NA	0.678991	rs289638	1	ENSG00000226113	6681	intergenic	0.062	NA	9	15
rs1780124	10	38530492	A	G	0.3847	NA	NA	NA	0.861574	rs2504142	1	ENSG00000226113	6358	intergenic	2.696	7	9	15
rs1780125	10	38531376	G	A	0.3936	NA	NA	NA	0.897575	rs2504142	1	ENSG00000226113	5474	intergenic	2.574	6	9	15
rs1892142	10	38531751	A	C	0.3887	1.476e-08	-0.3711	0.0655	0.919178	rs2504142	1	ENSG00000226113	5099	intergenic	0.912	6	9	15
rs1780127	10	38533117	C	G	0.3926	NA	NA	NA	0.89325	rs2504142	1	ENSG00000226113	3733	intergenic	NA	7	9	15
rs147564018	10	38533768	A	T	0.175	1.103e-07	0.4782	0.0901	0.719277	rs2472160	1	ENSG00000226113	3082	intergenic	6.848	7	9	15
rs1987631	10	38534621	A	G	0.2366	3.106e-07	0.4005	0.0783	0.662096	rs1535273	1	ENSG00000226113	2229	intergenic	2.345	6	9	15
rs2996577	10	38534990	T	C	0.3936	1.738e-08	0.3683	0.0653	0.897575	rs2504142	1	ENSG00000226113	1860	intergenic	5.677	NA	9	15
rs113618221	10	38535119	C	CTG	0.4145	NA	NA	NA	0.799273	rs2504142	1	ENSG00000226113	1729	intergenic	NA	NA	9	15
rs2983333	10	38536275	C	T	0.3936	NA	NA	NA	0.897575	rs2504142	1	ENSG00000226113	0	upstream	0.808	6	9	15
rs1780145	10	38537070	A	G	0.3887	5.058e-08	-0.3554	0.0652	0.919178	rs2504142	1	ENSG00000226113	0	ncRNA_intronic	1.467	6	9	15
rs2996628	10	38538072	A	T	0.3936	5.044e-08	-0.3553	0.0652	0.897575	rs2504142	1	ENSG00000226113	0	ncRNA_intronic	0.374	6	9	15
rs1740752	10	38538771	A	G	0.4264	1.282e-06	-0.3123	0.0645	0.769416	rs2504142	1	ENSG00000226113	0	ncRNA_intronic	2.925	5	9	15
rs146195183	10	38538808	AT	A	0.175	NA	NA	NA	0.719277	rs2472160	1	ENSG00000226113	0	ncRNA_intronic	NA	NA	9	15
rs67162841	10	38540075	A	G	0.16	2.869e-06	0.4586	0.098	0.622541	rs2472160	1	ENSG00000226113	0	ncRNA_intronic	3.849	7	9	15
rs1740753	10	38540976	A	C	0.2336	1.744e-06	-0.3716	0.0777	0.639675	rs1535273	1	ENSG00000226113	0	ncRNA_intronic	4.091	5	1	15
rs2800484	10	38542415	T	C	0.3936	1.007e-07	0.3519	0.0661	0.897575	rs2504142	1	ENSG00000226113	0	ncRNA_intronic	6.04	7	9	15
rs2800485	10	38542588	A	G	0.3936	7.182e-08	0.3505	0.0651	0.897575	rs2504142	1	ENSG00000226113	0	ncRNA_intronic	0.01	7	9	15
rs2749639	10	38542936	C	T	0.4742	NA	NA	NA	0.678991	rs289638	1	ENSG00000226113	0	ncRNA_intronic	3.189	7	9	15
rs10508864	10	38544919	C	G	0.159	3.656e-06	0.4469	0.0965	0.604193	rs2472160	1	ENSG00000226113	0	ncRNA_intronic	NA	7	9	15
rs2749640	10	38545078	T	G	0.4742	3.948e-05	0.2688	0.0654	0.678991	rs289638	1	ENSG00000226113	0	ncRNA_intronic	0.403	5	9	15
rs7099348	10	38547573	A	G	0.3936	6.954e-08	0.3511	0.0651	0.897575	rs2504142	1	ENSG00000226113	0	ncRNA_intronic	4.148	7	9	15
rs2995355	10	38548744	A	G	0.4742	NA	NA	NA	0.678991	rs289638	1	ENSG00000226113	0	ncRNA_intronic	5.178	NA	9	15
rs140742009	10	38549425	T	C	0.161	3.023e-06	0.4583	0.0981	0.616511	rs2472160	1	ENSG00000226113	0	ncRNA_intronic	7.972	6	9	15
rs2983338	10	38550734	T	C	0.3936	8.93e-08	0.3478	0.065	0.897575	rs2504142	1	ENSG00000226113	0	ncRNA_intronic	2.09	6	9	15
rs2749649	10	38550877	A	G	0.4264	6.011e-07	-0.3226	0.0646	0.769416	rs2504142	1	ENSG00000226113	0	ncRNA_intronic	10.55	7	9	15
rs2800470	10	38550901	T	C	0.4264	1.064e-06	-0.317	0.065	0.769416	rs2504142	1	ENSG00000226113	0	ncRNA_intronic	2.329	NA	9	15
rs2800469	10	38551001	A	T	0.4264	2.521e-06	-0.3043	0.0647	0.761731	rs2504142	1	ENSG00000226113	0	ncRNA_intronic	NA	7	9	15
rs2749650	10	38551850	T	C	0.4264	NA	NA	NA	0.769416	rs2504142	1	ENSG00000226113	0	ncRNA_intronic	1.372	6	9	15
rs11011502	10	38551984	C	T	0.4235	NA	NA	NA	0.756974	rs2504142	1	ENSG00000226113	0	ncRNA_intronic	2.283	6	9	15
rs17594550	10	38553627	T	C	0.3966	NA	NA	NA	0.691148	rs2504142	1	ENSG00000226113	0	ncRNA_intronic	3.97	7	15	15
rs76782412	10	38553677	T	C	0.4185	NA	NA	NA	0.775543	rs2504142	1	ENSG00000226113	0	ncRNA_intronic	2.828	7	15	15
rs2749651	10	38554448	A	G	0.4264	NA	NA	NA	0.769416	rs2504142	1	ENSG00000226113	0	ncRNA_intronic	2.93	7	9	15
rs55880292	10	38554626	T	C	0.1551	5.13e-06	-0.4551	0.0998	0.604268	rs2472160	1	ENSG00000226113	0	ncRNA_intronic	2.997	7	9	15
rs4641407	10	38554693	T	C	0.4264	1.848e-06	-0.3066	0.0643	0.769416	rs2504142	1	ENSG00000226113	0	ncRNA_intronic	0.636	6	9	15
rs1780123	10	38554859	T	C	0.4264	1.449e-06	-0.3099	0.0643	0.769416	rs2504142	1	ENSG00000226113	0	ncRNA_intronic	3.716	NA	9	15
rs2384740	10	38555617	A	G	0.4264	1.609e-06	-0.3085	0.0643	0.769416	rs2504142	1	ENSG00000226113	0	ncRNA_intronic	0.123	7	9	15
rs2996579	10	38556576	T	C	0.4264	5.683e-07	0.3223	0.0644	0.769416	rs2504142	1	ENSG00000226113	0	ncRNA_intronic	5.523	NA	9	15
rs61366164	10	38557775	T	TA	0.4274	NA	NA	NA	0.765575	rs2504142	1	ENSG00000226113	0	ncRNA_intronic	NA	NA	9	15
rs1980567	10	38559288	G	A	0.4264	NA	NA	NA	0.769416	rs2504142	1	ENSG00000226113	0	ncRNA_intronic	NA	6	9	15
rs1980569	10	38559479	A	G	0.4245	NA	NA	NA	0.768448	rs2504142	1	ENSG00000226113	0	ncRNA_intronic	0.989	6	9	15
rs9417304	10	38560548	A	G	0.4264	4.52e-07	0.3285	0.0651	0.769416	rs2504142	1	ENSG00000226113	0	ncRNA_intronic	1.345	7	9	15
rs11011512	10	38560578	A	G	0.4264	1.82e-06	0.3086	0.0647	0.769416	rs2504142	1	ENSG00000226113	0	ncRNA_intronic	0.114	7	9	15
rs2997802	10	38570763	A	G	0.2336	3.065e-07	-0.401	0.0783	0.639675	rs1535273	1	ENSG00000226113	0	ncRNA_intronic	6.259	NA	9	15
rs2996607	10	38574126	T	C	0.2336	4.327e-07	0.3949	0.0781	0.639675	rs1535273	1	ENSG00000226113	0	ncRNA_intronic	4.982	NA	9	15
rs1977213	10	38579242	A	G	0.2336	5.962e-07	0.3899	0.0781	0.639675	rs1535273	1	ENSG00000226113	0	ncRNA_intronic	0.382	7	9	15
rs3001692	10	38580025	C	G	0.2336	9.882e-07	0.384	0.0785	0.639675	rs1535273	1	ENSG00000226113	0	ncRNA_intronic	0.852	5	9	15
rs4619095	10	38580335	G	T	0.2336	NA	NA	NA	0.639675	rs1535273	1	ENSG00000226113	0	ncRNA_intronic	3.383	6	9	15
rs2983857	10	38582106	A	G	0.2366	2.334e-07	0.4085	0.079	0.662096	rs1535273	1	ENSG00000226113	0	ncRNA_intronic	1.843	7	9	15
rs2996620	10	38582706	C	G	0.4205	3.697e-07	0.329	0.0647	0.781291	rs2504142	1	ENSG00000226113	0	ncRNA_intronic	0.613	7	9	15
rs139564669	10	38584815	T	TC	0.2366	NA	NA	NA	0.662096	rs1535273	1	ENSG00000226113	0	ncRNA_intronic	NA	NA	9	15
rs199615537	10	38584818	T	A	0.2366	NA	NA	NA	0.662096	rs1535273	1	ENSG00000226113	0	ncRNA_intronic	5.204	6	9	15
rs377599840	10	38585910	AATAATG	A	0.2495	NA	NA	NA	0.631989	rs1535273	1	ENSG00000226113	0	ncRNA_intronic	0.072	NA	9	15
rs2997787	10	38585986	A	T	0.2366	2.761e-07	-0.3992	0.0777	0.662096	rs1535273	1	ENSG00000226113	0	ncRNA_intronic	0.977	7	9	15
rs2997786	10	38586401	A	G	0.2346	2.708e-06	0.3629	0.0773	0.63473	rs1535273	1	ENSG00000226113	0	ncRNA_intronic	NA	6	9	15
rs140753243	10	38587942	TA	T	0.1541	NA	NA	NA	0.610537	rs2472160	1	ENSG00000226113	0	ncRNA_intronic	3.687	NA	9	15
rs2997785	10	38587956	A	T	0.4205	3.151e-07	-0.3311	0.0647	0.781291	rs2504142	1	ENSG00000226113	0	ncRNA_intronic	0.698	6	9	15
rs2997784	10	38587987	A	G	0.4205	3.598e-07	0.3295	0.0647	0.781291	rs2504142	1	ENSG00000226113	0	ncRNA_intronic	1.104	NA	9	15
rs2804671	10	38588650	T	C	0.2336	5.101e-07	-0.3913	0.0779	0.639675	rs1535273	1	ENSG00000226113	0	ncRNA_intronic	0.981	NA	9	15
rs2804670	10	38589642	T	C	0.2336	9.276e-07	0.3863	0.0787	0.639675	rs1535273	1	ENSG00000226113	0	ncRNA_intronic	4.27	NA	9	15
rs150245813	10	38592780	T	G	0.1551	1.269e-06	-0.4911	0.1014	0.605861	rs2472160	1	ENSG00000226113	0	ncRNA_intronic	3.024	7	9	15
rs2804669	10	38593742	A	C	0.2336	4.863e-07	0.3893	0.0774	0.639675	rs1535273	1	ENSG00000226113	0	ncRNA_intronic	8.032	7	9	15
rs112572447	10	38595190	A	G	0.16	2.802e-07	0.4973	0.0968	0.622541	rs2472160	1	ENSG00000226113	0	ncRNA_intronic	0.98	6	9	15
rs2804668	10	38595712	T	C	0.2336	4.451e-07	-0.3908	0.0774	0.639675	rs1535273	1	ENSG00000226113	0	ncRNA_intronic	0.789	NA	9	15
rs2754472	10	38597391	C	A	0.4175	NA	NA	NA	0.767048	rs2504142	1	ENSG00000226113	0	ncRNA_intronic	0.921	NA	9	15
rs2804665	10	38597731	A	G	0.4205	4.875e-07	0.3249	0.0646	0.781291	rs2504142	1	ENSG00000226113	0	ncRNA_intronic	9.074	NA	9	15
rs2754468	10	38598275	A	G	0.4205	4.709e-07	-0.3253	0.0646	0.781291	rs2504142	1	ENSG00000226113	0	ncRNA_intronic	2.042	NA	9	15
rs34686283	10	38599101	CT	C	0.4205	NA	NA	NA	0.781291	rs2504142	1	ENSG00000226113	0	ncRNA_exonic	12.91	NA	9	15
rs2804664	10	38599337	A	C	0.2336	4.584e-07	0.3902	0.0774	0.639675	rs1535273	1	ENSG00000226113	0	ncRNA_intronic	8.607	NA	9	15
rs2208515	10	38600045	T	A	0.4145	NA	NA	NA	0.753838	rs2504142	1	ENSG00000226113	0	ncRNA_intronic	NA	6	9	15
rs2800463	10	38600176	T	C	0.4205	3.201e-07	-0.3301	0.0646	0.781291	rs2504142	1	ENSG00000226113	0	ncRNA_intronic	2.599	NA	9	15
rs2025068	10	38602770	T	C	0.4205	3.854e-07	0.3275	0.0645	0.781291	rs2504142	1	ENSG00000226113	0	ncRNA_intronic	3.906	NA	9	15
rs2800461	10	38603615	A	G	0.2336	4.478e-07	-0.3904	0.0773	0.639675	rs1535273	1	ENSG00000226113	0	ncRNA_intronic	7.359	NA	9	15
rs2800460	10	38603778	G	A	0.4175	NA	NA	NA	0.775772	rs2504142	1	ENSG00000226113	0	ncRNA_intronic	NA	NA	9	15
rs2804658	10	38606188	T	C	0.4205	NA	NA	NA	0.781291	rs2504142	1	ENSG00000226113	0	ncRNA_intronic	3	NA	9	15
rs1892143	10	38606505	A	G	0.4215	4.261e-07	0.3256	0.0644	0.777344	rs2504142	1	ENSG00000226113	0	ncRNA_intronic	0.546	NA	9	15
rs2800459	10	38606950	T	C	0.4205	2.654e-07	-0.3319	0.0645	0.781291	rs2504142	1	ENSG00000226113	0	ncRNA_intronic	0.49	NA	9	15
rs2804657	10	38607306	T	C	0.4205	3.115e-07	0.33	0.0645	0.781291	rs2504142	1	ENSG00000226113	0	ncRNA_intronic	2.432	NA	9	15
rs9340156	10	38607651	T	C	0.2336	NA	NA	NA	0.639675	rs1535273	1	ENSG00000226113	0	ncRNA_intronic	5.578	NA	9	15
rs34361856	10	38608063	A	AC	0.4443	NA	NA	NA	0.692494	rs2504142	1	ENSG00000226113	0	ncRNA_intronic	0.045	NA	9	15
rs2800456	10	38608566	C	G	0.4205	5.66e-07	0.3231	0.0646	0.781291	rs2504142	1	ENSG00000226113	0	ncRNA_intronic	2.945	7	9	15
rs61165117	10	38612680	C	CT	0.4245	NA	NA	NA	0.779608	rs2504142	1	ENSG00000226113	0	ncRNA_intronic	NA	NA	9	15
rs2800564	10	38614153	G	A	0.2326	NA	NA	NA	0.634485	rs1535273	1	ENSG00000226113	0	ncRNA_intronic	8.719	NA	9	15
rs2804648	10	38614641	A	G	0.4195	2.464e-07	0.3359	0.0651	0.776529	rs2504142	1	ENSG00000226113	0	ncRNA_intronic	0.092	NA	9	15
rs2804646	10	38617199	A	G	0.2336	2.043e-06	0.3672	0.0773	0.639675	rs1535273	1	ENSG00000226113	0	ncRNA_intronic	6.314	6	9	15
rs7095735	10	38618753	A	G	0.16	4.909e-07	-0.4868	0.0968	0.622541	rs2472160	1	ENSG00000226113	0	ncRNA_intronic	6.813	7	9	15
rs7080203	10	38618879	T	C	0.16	3.171e-06	-0.4528	0.0972	0.622541	rs2472160	1	ENSG00000226113	0	ncRNA_intronic	12.17	6	9	15
rs2754428	10	38623375	T	C	0.2366	1.137e-06	-0.3746	0.077	0.662096	rs1535273	1	ENSG00000226113	1292	intergenic	1.647	7	9	15
rs2754426	10	38623469	A	G	0.4205	1.839e-06	-0.3064	0.0642	0.781291	rs2504142	1	ENSG00000226113	1386	intergenic	8.585	NA	9	15
rs2754412	10	38627834	A	G	0.4364	8.094e-06	-0.2884	0.0646	0.72219	rs2504142	1	ENSG00000226113	5751	intergenic	1.394	NA	9	15
rs2754397	10	38633339	A	G	0.4205	3.12e-07	0.3316	0.0648	0.781291	rs2504142	1	ENSG00000226113	11256	intergenic	1.613	NA	9	15
rs369577778	10	38634076	TA	T	0.3996	NA	NA	NA	0.680486	rs2504142	1	HSD17B7P2	11229	intergenic	0.913	NA	9	15
rs2800559	10	38634955	G	A	0.2336	NA	NA	NA	0.639675	rs1535273	1	HSD17B7P2	10350	intergenic	5.424	NA	9	15
rs2800557	10	38635442	A	G	0.4205	3.016e-07	-0.3324	0.0649	0.781291	rs2504142	1	HSD17B7P2	9863	intergenic	5.116	NA	9	15
rs142562903	10	38636102	T	C	0.1581	1.431e-05	0.4379	0.1009	0.611923	rs2472160	1	HSD17B7P2	9203	intergenic	3.651	5	5	15
rs148317417	10	38637982	GA	G	0.1571	NA	NA	NA	0.601788	rs2472160	1	HSD17B7P2	7323	intergenic	11.18	NA	5	15
rs2800555	10	38638379	T	G	0.4205	3.841e-07	-0.3293	0.0649	0.781291	rs2504142	1	HSD17B7P2	6926	intergenic	2.087	NA	5	15
rs2804637	10	38639326	T	C	0.4205	1.752e-06	-0.3108	0.065	0.781291	rs2504142	1	HSD17B7P2	5979	intergenic	6.546	7	5	15
rs2804641	10	38646804	T	C	0.4205	1.749e-06	-0.3103	0.0649	0.781291	rs2504142	1	HSD17B7P2	0	ncRNA_intronic	6.597	6	1	5
rs2800473	10	38647171	C	G	0.4205	1.754e-06	-0.3102	0.0649	0.781291	rs2504142	1	HSD17B7P2	0	ncRNA_intronic	9.837	7	1	5
rs61632143	10	38648468	A	AT	0.4205	NA	NA	NA	0.781291	rs2504142	1	HSD17B7P2	0	ncRNA_intronic	7.593	NA	4	5
rs2800475	10	38649452	T	C	0.2336	2.236e-06	0.3637	0.0769	0.639675	rs1535273	1	HSD17B7P2	0	ncRNA_intronic	8.076	7	4	5
rs2804643	10	38650104	G	A	0.4205	NA	NA	NA	0.781291	rs2504142	1	HSD17B7P2	0	ncRNA_intronic	6.462	7	4	5
rs71529004	10	38651914	T	A	0.4056	NA	NA	NA	0.721416	rs2504142	1	HSD17B7P2	0	ncRNA_intronic	0.032	7	4	5
rs2754353	10	38653996	T	C	0.4205	1.737e-06	0.3104	0.0649	0.781291	rs2504142	1	HSD17B7P2	0	ncRNA_intronic	1.794	7	4	5
rs2804645	10	38654940	T	G	0.2336	2.109e-06	-0.3646	0.0769	0.639675	rs1535273	1	HSD17B7P2	0	ncRNA_splicing	5.94	4	4	5
rs2754369	10	38655478	T	C	0.2336	4.048e-07	0.3902	0.077	0.639675	rs1535273	1	HSD17B7P2	0	ncRNA_intronic	0.077	7	4	5
rs2754370	10	38655606	T	C	0.4205	2.184e-06	0.3079	0.065	0.781291	rs2504142	1	HSD17B7P2	0	ncRNA_intronic	2.671	6	4	5
rs2236265	10	38658410	G	A	0.2376	NA	NA	NA	0.666235	rs1535273	1	HSD17B7P2	0	ncRNA_intronic	6.768	7	4	5
rs2804676	10	38660563	A	G	0.2346	3.627e-07	-0.3935	0.0773	0.63473	rs1535273	1	HSD17B7P2	0	ncRNA_intronic	4.707	6	4	4
rs9418368	10	38663166	T	C	0.4205	2.243e-06	0.3083	0.0652	0.781291	rs2504142	1	HSD17B7P2	0	ncRNA_intronic	3.067	7	5	5
rs3121610	10	38665905	A	G	0.2366	2.837e-07	-0.399	0.0777	0.662096	rs1535273	1	HSD17B7P2	0	ncRNA_intronic	3.985	6	4	5
rs2804622	10	38667003	G	A	0.4205	NA	NA	NA	0.781291	rs2504142	1	HSD17B7P2	0	ncRNA_exonic	1.122	7	4	15
rs2800483	10	38667826	A	C	0.2336	3.125e-06	0.3625	0.0778	0.639675	rs1535273	1	HSD17B7P2	0	downstream	9.506	7	4	15
rs2804623	10	38669528	A	G	0.4205	6.017e-07	0.3267	0.0655	0.781291	rs2504142	1	HSD17B7P2	2095	intergenic	3.974	6	5	15
rs61840534	10	38671835	A	G	0.4205	NA	NA	NA	0.781291	rs2504142	1	SEPT7P9	0	downstream	4.613	7	5	15
rs1892144	10	38675899	T	C	0.4205	6.752e-07	0.3275	0.0659	0.781291	rs2504142	1	SEPT7P9	0	ncRNA_intronic	3.751	7	5	15
rs2754358	10	38676848	A	G	0.2326	6.672e-07	0.3921	0.0789	0.63565	rs1535273	1	SEPT7P9	0	ncRNA_intronic	0.618	7	5	15
rs191103776	10	38678634	T	C	0.159	NA	NA	NA	0.628641	rs2472160	1	SEPT7P9	0	ncRNA_intronic	7.789	6	5	15
rs2754362	10	38679499	A	G	0.2356	8.485e-07	0.3968	0.0806	0.657984	rs1535273	1	SEPT7P9	0	ncRNA_intronic	7.015	7	5	15
rs2754363	10	38679720	T	G	0.4205	5.036e-06	0.309	0.0677	0.781291	rs2504142	1	SEPT7P9	0	ncRNA_intronic	1.368	4	5	15
rs189226539	10	38681389	G	T	0.2326	NA	NA	NA	0.63565	rs1535273	1	SEPT7P9	0	ncRNA_intronic	NA	6	5	15
rs200639836	10	38681390	A	AT	0.2326	NA	NA	NA	0.63565	rs1535273	1	SEPT7P9	0	ncRNA_intronic	NA	NA	5	15
rs533113154	10	38681392	G	A	0.2326	NA	NA	NA	0.63565	rs1535273	1	SEPT7P9	0	ncRNA_intronic	NA	NA	5	15
rs200266143	10	38681394	T	A	0.2326	NA	NA	NA	0.63565	rs1535273	1	SEPT7P9	0	ncRNA_intronic	NA	6	5	15
rs201259558	10	38681395	T	A	0.2326	NA	NA	NA	0.63565	rs1535273	1	SEPT7P9	0	ncRNA_intronic	NA	6	5	15
rs4614384	10	38682076	T	C	0.1571	6.014e-06	0.4804	0.1061	0.618017	rs2472160	1	SEPT7P9	0	ncRNA_intronic	11.86	6	5	15
rs2754366	10	38682079	T	C	0.4205	9.22e-06	-0.307	0.0692	0.781291	rs2504142	1	SEPT7P9	0	ncRNA_intronic	11.1	6	5	15
rs200516997	10	38682497	TATC	T	0.4155	NA	NA	NA	0.757622	rs2504142	1	SEPT7P9	0	ncRNA_intronic	10.71	NA	5	15
rs9418376	10	38683000	A	G	0.4225	NA	NA	NA	0.774329	rs2504142	1	SEPT7P9	0	ncRNA_intronic	11.77	6	5	15
rs2804628	10	38683893	A	G	0.2326	1.923e-06	0.3922	0.0824	0.63565	rs1535273	1	SEPT7P9	0	ncRNA_intronic	7.687	7	9	15
rs2145673	10	38684073	A	G	0.2356	1.196e-06	-0.4009	0.0825	0.657984	rs1535273	1	SEPT7P9	0	ncRNA_intronic	4.75	7	9	15
rs147057986	10	38684956	T	TCAAA	0.2326	NA	NA	NA	0.63565	rs1535273	1	SEPT7P9	0	ncRNA_intronic	12.78	NA	9	15
rs139212737	10	38686179	A	C	0.159	0.0001688	0.4141	0.1101	0.628641	rs2472160	1	SEPT7P9	0	ncRNA_intronic	10.74	7	5	15
rs61687581	10	38687534	C	T	0.159	NA	NA	NA	0.628641	rs2472160	1	SEPT7P9	0	ncRNA_intronic	8.279	6	5	15
rs17611180	10	38687681	G	A	0.4205	NA	NA	NA	0.781291	rs2504142	1	SEPT7P9	0	ncRNA_intronic	8.652	6	5	15
rs61837213	10	38687765	C	T	0.4205	NA	NA	NA	0.781291	rs2504142	1	SEPT7P9	0	ncRNA_intronic	8.363	6	5	15
rs9340228	10	38689264	C	T	0.2326	NA	NA	NA	0.63565	rs1535273	1	SEPT7P9	0	ncRNA_intronic	9.689	7	5	15
rs63207361	10	38690311	A	T	0.4185	0.002828	-0.2249	0.0753	0.771782	rs2504142	1	SEPT7P9	0	ncRNA_intronic	13.3	7	1	15
rs397960173	10	38690332	AC	A	0.1581	NA	NA	NA	0.623314	rs2472160	1	SEPT7P9	0	ncRNA_intronic	NA	NA	1	15
rs4006989	10	38690332	C	A	0.06163	NA	NA	NA	0.623314	rs2472160	1	NA	NA	NA	12.55	6	1	15
rs2804633	10	38691130	T	C	0.2326	7.821e-05	-0.3469	0.0878	0.63565	rs1535273	1	SEPT7P9	0	ncRNA_intronic	2.297	7	1	1
rs61837215	10	38691719	C	G	0.4205	0.0006768	-0.2549	0.075	0.781291	rs2504142	1	SEPT7P9	0	ncRNA_exonic	7.669	4	1	1
rs564405200	10	38692042	G	C	0.4304	NA	NA	NA	0.745455	rs2504142	1	SEPT7P9	0	upstream	NA	NA	1	1
rs17595306	10	38692067	G	C	0.4264	NA	NA	NA	0.760724	rs2504142	1	SEPT7P9	0	upstream	4.262	4	1	1
rs4934947	10	38692086	T	C	0.4225	NA	NA	NA	0.758839	rs2504142	1	SEPT7P9	0	upstream	6.965	2b	1	1
rs4934948	10	38692432	C	G	0.4205	0.001154	-0.2456	0.0756	0.781291	rs2504142	1	SEPT7P9	0	upstream	0.745	5	1	1
rs2804634	10	38692597	A	G	0.2326	6.886e-05	0.35	0.0879	0.63565	rs1535273	1	SEPT7P9	0	upstream	3.121	5	1	1
rs2754373	10	38694218	G	A	0.2326	NA	NA	NA	0.63565	rs1535273	1	SEPT7P9	2374	intergenic	7.103	7	5	15
rs199543847	10	38697398	A	G	0.2356	NA	NA	NA	0.657984	rs1535273	1	SEPT7P9	5554	intergenic	5.639	6	4	15
rs9732107	10	38700234	A	C	0.1571	NA	NA	NA	0.618017	rs2472160	1	SEPT7P9	8390	intergenic	3.053	7	4	15
rs9730745	10	38700452	A	T	0.4205	0.0009125	-0.2517	0.0759	0.781291	rs2504142	1	SEPT7P9	8608	intergenic	1.921	7	4	15
rs189232609	10	38701017	A	G	0.1521	NA	NA	NA	0.600048	rs2472160	1	SEPT7P9	9173	intergenic	6.224	6	5	15
rs17595369	10	38701670	T	C	0.2356	NA	NA	NA	0.657984	rs1535273	1	SEPT7P9	9826	intergenic	5.394	6	5	15
rs9340247	10	38701781	A	G	0.4215	NA	NA	NA	0.777344	rs2504142	1	SEPT7P9	9937	intergenic	0.191	7	5	15
rs17611271	10	38702651	T	C	0.2356	NA	NA	NA	0.657984	rs1535273	1	RNU6-1118P	9902	intergenic	0.115	7	4	15
rs17611278	10	38702668	A	G	0.4205	NA	NA	NA	0.781291	rs2504142	1	RNU6-1118P	9885	intergenic	0.124	7	4	15
rs17595376	10	38704325	G	A	0.2326	NA	NA	NA	0.63565	rs1535273	1	RNU6-1118P	8228	intergenic	2.528	6	5	15
rs3930236	10	38706028	T	C	0.4215	0.001261	-0.2453	0.0761	0.770482	rs2504142	1	RNU6-1118P	6525	intergenic	7.936	7	4	15
rs147674415	10	38706563	CT	C	0.174	NA	NA	NA	0.687155	rs2472160	1	RNU6-1118P	5990	intergenic	NA	NA	5	15
rs11511146	10	38709145	C	T	0.4205	NA	NA	NA	0.781291	rs2504142	1	RNU6-1118P	3408	intergenic	5.346	7	5	15
rs17595425	10	38713482	T	A	0.4205	NA	NA	NA	0.781291	rs2504142	1	RNU6-1118P	0	downstream	3.018	7	5	15
rs200643238	10	38713701	G	C	0.2326	NA	NA	NA	0.63565	rs1535273	1	RNU6-1118P	1045	intergenic	2.254	6	5	15
rs11523370	10	38713959	A	G	0.4205	NA	NA	NA	0.781291	rs2504142	1	RNU6-1118P	1303	intergenic	2.539	6	5	15
rs143270342	10	38715464	G	GAA	0.2326	NA	NA	NA	0.63565	rs1535273	1	LINC00999	1608	intergenic	0.165	NA	4	15
rs66812212	10	38715498	C	CT	0.3926	NA	NA	NA	0.691875	rs2504142	1	LINC00999	1575	intergenic	NA	NA	4	15
rs9665704	10	38717625	A	C	0.4195	NA	NA	NA	0.777435	rs2504142	1	LINC00999	0	intronic	5.428	6	5	15
rs17595446	10	38718098	G	A	0.2326	NA	NA	NA	0.63565	rs1535273	1	LINC00999	0	intronic	0.203	7	5	15
rs9340274	10	38719852	A	G	0.4205	0.003645	0.2214	0.0761	0.781291	rs2504142	1	LINC00999	0	intronic	1.815	6	5	15
rs200129406	10	38720176	A	T	0.159	NA	NA	NA	0.628641	rs2472160	1	LINC00999	0	intronic	5.043	7	5	15
rs11511147	10	38720442	T	A	0.4205	NA	NA	NA	0.781291	rs2504142	1	LINC00999	0	intronic	7.983	7	5	15
rs201722682	10	38720536	C	T	0.174	NA	NA	NA	0.725423	rs2472160	1	LINC00999	0	intronic	4.054	7	5	15
rs9731321	10	38721008	T	C	0.2326	NA	NA	NA	0.63565	rs1535273	1	LINC00999	0	intronic	0.214	7	5	15
rs9340277	10	38721270	A	G	0.4205	0.003814	0.2203	0.0762	0.781291	rs2504142	1	LINC00999	0	intronic	1.578	6	5	15
rs17595460	10	38721986	A	G	0.4205	0.001132	0.2478	0.0761	0.781291	rs2504142	1	LINC00999	0	intronic	3.866	6	5	15
rs114022052	10	38722594	T	C	0.159	NA	NA	NA	0.628641	rs2472160	1	LINC00999	0	intronic	6.194	6	4	15
rs17595473	10	38723165	G	A	0.4205	NA	NA	NA	0.781291	rs2504142	1	LINC00999	0	intronic	2.431	7	4	15
rs17595480	10	38723166	T	G	0.4205	NA	NA	NA	0.781291	rs2504142	1	LINC00999	0	intronic	0.837	7	4	15
rs139445175	10	38723520	C	CTTT	0.4205	NA	NA	NA	0.781291	rs2504142	1	LINC00999	0	intronic	NA	NA	4	15
rs200776872	10	38723591	A	G	0.1571	NA	NA	NA	0.618017	rs2472160	1	LINC00999	0	intronic	7.854	6	4	15
rs17611404	10	38725007	A	G	0.4205	0.001076	0.249	0.0762	0.781291	rs2504142	1	LINC00999	0	intronic	4.719	5	5	15
rs202154743	10	38726794	A	ACT	0.4205	NA	NA	NA	0.781291	rs2504142	1	LINC00999	0	intronic	2.578	NA	5	15
rs17595494	10	38727036	T	G	0.2326	NA	NA	NA	0.63565	rs1535273	1	LINC00999	0	intronic	6.038	7	5	15
rs17595501	10	38727042	T	A	0.2326	NA	NA	NA	0.63565	rs1535273	1	LINC00999	0	intronic	7.55	7	5	15
rs181997117	10	38727660	G	C	0.2326	NA	NA	NA	0.63565	rs1535273	1	LINC00999	0	intronic	8.216	6	5	15
rs61839471	10	38728754	A	G	0.4205	NA	NA	NA	0.781291	rs2504142	1	LINC00999	0	intronic	0.608	6	5	15
rs71529011	10	38733158	GA	G	0.3787	NA	NA	NA	0.716663	rs2504142	1	LINC00999	0	intronic	0.829	NA	5	15
rs9731089	10	38735541	C	G	0.4165	NA	NA	NA	0.762328	rs2504142	1	LINC00999	0	intronic	0.523	7	5	15
rs9731098	10	38735603	A	G	0.2316	NA	NA	NA	0.637332	rs1535273	1	LINC00999	0	intronic	9.909	6	5	15
rs17611446	10	38736172	A	C	0.4205	0.003228	0.2246	0.0763	0.781291	rs2504142	1	LINC00999	0	intronic	2.856	5	5	5
rs4006909	10	38737081	G	C	0.2326	NA	NA	NA	0.63565	rs1535273	1	LINC00999	0	downstream	0.637	7	4	15
rs2804650	10	38739704	A	G	0.4195	0.001209	0.2462	0.0761	0.776529	rs2504142	1	CICP9	2211	intergenic	5.429	5	4	15
rs61839477	10	38740029	T	C	0.4185	0.0007035	0.2583	0.0762	0.771782	rs2504142	1	CICP9	1886	intergenic	4.444	5	4	15
rs2804652	10	38740233	C	A	0.2356	NA	NA	NA	0.657984	rs1535273	1	CICP9	1682	intergenic	0.099	5	4	15
rs2804653	10	38740546	T	G	0.4205	0.0006695	0.2588	0.0761	0.781291	rs2504142	1	CICP9	1369	intergenic	0.175	5	4	15
rs539639816	10	38741759	C	CA	0.4284	NA	NA	NA	0.742391	rs2504142	1	CICP9:ENSG00000203496	0	downstream:upstream	4.606	NA	5	15
rs3881548	10	38743039	A	G	0.4205	NA	NA	NA	0.781291	rs2504142	1	CICP9	0	ncRNA_exonic	0.229	7	9	15
rs2804655	10	38743802	T	G	0.4205	0.001147	0.246	0.0757	0.781291	rs2504142	1	CICP9	0	ncRNA_exonic	0.99	7	9	15
rs61839483	10	38744198	T	G	0.4205	0.004049	-0.2175	0.0757	0.781291	rs2504142	1	CICP9	0	ncRNA_exonic	0.987	7	9	15
rs9665284	10	38744437	A	C	0.4215	NA	NA	NA	0.777344	rs2504142	1	ENSG00000203496	0	ncRNA_intronic	NA	7	9	15
rs9665285	10	38744438	A	C	0.4215	NA	NA	NA	0.777344	rs2504142	1	ENSG00000203496	0	ncRNA_intronic	3.905	7	9	15
rs9665300	10	38744589	A	G	0.4195	NA	NA	NA	0.776529	rs2504142	1	ENSG00000203496	0	ncRNA_intronic	1.451	7	9	15
rs3881551	10	38749619	A	G	0.4682	NA	NA	NA	0.634826	rs2504142	1	ENSG00000203496	0	ncRNA_intronic	1.632	6	9	15
rs17595778	10	38750268	T	C	0.4682	NA	NA	NA	0.634826	rs2504142	1	ENSG00000203496	0	ncRNA_intronic	2.841	7	9	15
rs9340327	10	38751449	T	C	0.4632	NA	NA	NA	0.645338	rs2504142	1	ENSG00000203496	0	ncRNA_intronic	5.387	7	9	15
rs9340328	10	38752939	A	C	0.4205	0.001172	-0.2451	0.0755	0.781291	rs2504142	1	ENSG00000203496	0	ncRNA_intronic	0.04	7	9	15
rs9702149	10	38754361	T	C	0.4185	NA	NA	NA	0.773618	rs2504142	1	ENSG00000203496	0	ncRNA_intronic	4.96	7	9	15
rs189630360	10	38754990	C	T	0.159	NA	NA	NA	0.628641	rs2472160	1	ENSG00000203496	0	ncRNA_exonic	1.876	7	9	15
rs116644359	10	38755021	G	C	0.174	NA	NA	NA	0.725423	rs2472160	1	ENSG00000203496	0	ncRNA_exonic	0.471	6	9	15
rs2997779	10	38756251	A	G	0.2326	NA	NA	NA	0.63565	rs1535273	1	ENSG00000203496	1147	intergenic	0.327	7	9	15
rs17611752	10	38759699	G	A	0.4225	NA	NA	NA	0.773412	rs2504142	1	ENSG00000203496	4595	intergenic	5.939	6	9	15
rs17611759	10	38760040	T	G	0.4225	0.002324	0.2296	0.0754	0.773412	rs2504142	1	ENSG00000203496	4936	intergenic	3.008	7	9	15
rs17595841	10	38760355	A	T	0.2326	NA	NA	NA	0.63565	rs1535273	1	ENSG00000203496	5251	intergenic	4.993	7	9	15
rs9340346	10	38761191	T	C	0.2326	NA	NA	NA	0.63565	rs1535273	1	ENSG00000203496	6087	intergenic	2.869	6	9	15
rs17611787	10	38763727	G	A	0.4205	NA	NA	NA	0.781291	rs2504142	1	ENSG00000203496	8623	intergenic	7.904	6	9	15
rs9340349	10	38763796	A	C	0.4215	0.001428	-0.2399	0.0752	0.777344	rs2504142	1	ENSG00000203496	8692	intergenic	5.461	6	9	15
rs9665639	10	38764131	G	A	0.4205	NA	NA	NA	0.781291	rs2504142	1	ENSG00000203496	9027	intergenic	4.606	7	9	15
rs2490800	10	38767463	T	G	0.4205	NA	NA	NA	0.781291	rs2504142	1	ENSG00000203496	12359	intergenic	0.887	6	9	15
rs72799727	10	38768655	T	A	0.1571	NA	NA	NA	0.618017	rs2472160	1	ENSG00000203496	13551	intergenic	1.09	6	9	15
rs17595888	10	38768669	A	G	0.2326	NA	NA	NA	0.63565	rs1535273	1	ENSG00000203496	13565	intergenic	0.93	7	9	15
rs11516752	10	38771248	G	T	0.4205	NA	NA	NA	0.781291	rs2504142	1	ENSG00000203496	16144	intergenic	3.009	5	9	15
rs2983950	10	38772093	A	G	0.4205	NA	NA	NA	0.781291	rs2504142	1	ENSG00000203496	16989	intergenic	0.727	7	9	15
rs17611836	10	38772264	G	C	0.2356	NA	NA	NA	0.657984	rs1535273	1	ENSG00000203496	17160	intergenic	0.978	6	9	9
rs12414801	10	38772300	A	G	0.172	NA	NA	NA	0.713845	rs2472160	1	ENSG00000203496	17196	intergenic	1.352	7	9	9
rs12412120	10	38772636	C	A	0.4195	NA	NA	NA	0.776529	rs2504142	1	ENSG00000203496	17532	intergenic	8.959	7	8	9
rs201470178	10	38773078	T	C	0.159	NA	NA	NA	0.628641	rs2472160	1	ENSG00000203496	17974	intergenic	9.318	7	8	8
rs117523072	10	38773399	T	G	0.2326	NA	NA	NA	0.63565	rs1535273	1	ENSG00000203496	18295	intergenic	7.214	7	8	9
rs11011569	10	38773450	A	G	0.4205	0.0009258	-0.2492	0.0752	0.781291	rs2504142	1	ENSG00000203496	18346	intergenic	10.49	7	8	9
rs62641464	10	38774367	T	C	0.2326	NA	NA	NA	0.63565	rs1535273	1	ENSG00000203496	19263	intergenic	NA	7	8	8
rs12359241	10	38774473	T	G	0.4205	NA	NA	NA	0.781291	rs2504142	1	ENSG00000203496	19369	intergenic	9.451	6	8	8
rs7085392	10	38774877	T	C	0.4205	NA	NA	NA	0.781291	rs2504142	1	ENSG00000203496	19773	intergenic	9.242	7	5	8
rs576503260	10	38775535	GCAATGTAAT	G	0.2326	NA	NA	NA	0.63565	rs1535273	1	ENSG00000203496	20431	intergenic	7.558	NA	5	8
rs12414238	10	38775745	C	G	0.4205	NA	NA	NA	0.781291	rs2504142	1	ENSG00000203496	20641	intergenic	7.201	7	5	8
rs112272940	10	38777043	A	G	0.2336	NA	NA	NA	0.639675	rs1535273	1	ENSG00000203496	21939	intergenic	10.64	7	8	8
rs12358226	10	38777147	A	G	0.4205	NA	NA	NA	0.781291	rs2504142	1	ENSG00000203496	22043	intergenic	9.619	7	8	8
rs201738995	10	38778440	T	TGAATG	0.4195	NA	NA	NA	0.785253	rs2504142	1	ENSG00000203496	23336	intergenic	NA	NA	8	8
rs111208363	10	38778606	A	G	0.2326	NA	NA	NA	0.63565	rs1535273	1	ENSG00000203496	23502	intergenic	9.895	6	8	8
rs12415492	10	38779582	T	G	0.2356	NA	NA	NA	0.657984	rs1535273	1	ENSG00000203496	24478	intergenic	8.603	7	8	8
rs11011575	10	38779631	A	C	0.4205	NA	NA	NA	0.781291	rs2504142	1	ENSG00000203496	24527	intergenic	9.595	7	8	8
rs62652134	10	38780209	C	T	0.4205	NA	NA	NA	0.781291	rs2504142	1	ENSG00000203496	25105	intergenic	9.721	7	8	8
rs201356562	10	38780918	T	TG	0.2326	NA	NA	NA	0.63565	rs1535273	1	ENSG00000203496	25814	intergenic	10.74	NA	8	8
rs12776424	10	38780923	C	T	0.4205	NA	NA	NA	0.781291	rs2504142	1	ENSG00000203496	25819	intergenic	9.638	7	8	8
rs7069864	10	38782462	A	T	0.4205	NA	NA	NA	0.781291	rs2504142	1	ENSG00000203496	27358	intergenic	12.18	7	1	8
rs7070016	10	38782537	A	T	0.4205	NA	NA	NA	0.781291	rs2504142	1	ENSG00000203496	27433	intergenic	11.95	7	1	8
rs62640201	10	38782642	A	G	0.2326	NA	NA	NA	0.63565	rs1535273	1	ENSG00000203496	27538	intergenic	10.92	7	1	8
rs111474957	10	38783881	G	A	0.2356	NA	NA	NA	0.657984	rs1535273	1	ENSG00000203496	28777	intergenic	10.55	7	1	9
rs4934950	10	38784675	A	G	0.4205	0.003804	0.2184	0.0754	0.781291	rs2504142	1	ENSG00000203496	29571	intergenic	9.557	7	5	9
rs4934951	10	38784709	C	T	0.4205	NA	NA	NA	0.781291	rs2504142	1	ENSG00000203496	29605	intergenic	10.3	6	5	9
rs111795700	10	38785120	A	G	0.2366	NA	NA	NA	0.65303	rs1535273	1	ENSG00000203496	30016	intergenic	10.61	7	1	8
rs58689189	10	38786902	T	C	0.4205	0.001135	0.2456	0.0755	0.781291	rs2504142	1	ENSG00000203496	31798	intergenic	9.403	7	5	8
rs34285563	10	38787106	A	G	0.4205	0.0008144	0.2529	0.0755	0.781291	rs2504142	1	ENSG00000203496	32002	intergenic	10.16	NA	5	8
rs4934954	10	38787591	A	T	0.4205	0.003791	0.2188	0.0756	0.781291	rs2504142	1	ENSG00000203496	32487	intergenic	12.42	7	5	8
rs201335608	10	38788005	G	GGGAATGGAATGGAAGAGAAT	0.2316	NA	NA	NA	0.631652	rs1535273	1	ENSG00000203496	32901	intergenic	NA	NA	1	8
rs35857797	10	38788481	A	G	0.4205	0.00358	0.2211	0.0759	0.781291	rs2504142	1	ENSG00000203496	33377	intergenic	9.449	7	1	8
rs11011583	10	38788840	T	C	0.4205	NA	NA	NA	0.781291	rs2504142	1	ENSG00000203496	33736	intergenic	9.638	7	8	8
rs77272690	10	38788860	T	C	0.4205	0.002991	0.2253	0.0759	0.781291	rs2504142	1	ENSG00000203496	33756	intergenic	9.281	7	8	8
rs34647253	10	38789415	T	G	0.4205	NA	NA	NA	0.781291	rs2504142	1	ENSG00000203496	34311	intergenic	9.278	6	8	8
rs113248353	10	38789678	C	T	0.2356	NA	NA	NA	0.657984	rs1535273	1	ENSG00000203496	34574	intergenic	9.65	7	8	8
rs555862567	10	38789990	A	G	0.1541	NA	NA	NA	0.610537	rs2472160	1	ENSG00000203496	34886	intergenic	10.15	NA	8	8
rs7082875	10	38790428	A	T	0.2356	NA	NA	NA	0.657984	rs1535273	1	ENSG00000203496	35324	intergenic	11.81	6	8	8
rs62652150	10	38790943	A	T	0.4205	NA	NA	NA	0.781291	rs2504142	1	ENSG00000203496	35839	intergenic	11.7	7	8	8
rs62638259	10	38791150	A	G	0.4205	NA	NA	NA	0.781291	rs2504142	1	ENSG00000203496	36046	intergenic	10.11	7	8	8
rs111208412	10	38791266	C	A	0.2356	NA	NA	NA	0.657984	rs1535273	1	ENSG00000203496	36162	intergenic	8.966	6	8	8
rs59649400	10	38791549	G	A	0.4642	NA	NA	NA	0.646846	rs2504142	1	ENSG00000203496	36445	intergenic	9.933	7	8	8
rs12257209	10	38792507	T	C	0.4672	0.01047	-0.1952	0.0763	0.642575	rs2504142	1	ENSG00000203496	37403	intergenic	9.674	7	8	9
rs11011586	10	38794053	G	A	0.4682	NA	NA	NA	0.641196	rs2504142	1	ENSG00000203496	38949	intergenic	10.64	7	8	8
rs12780442	10	38794441	T	C	0.4682	NA	NA	NA	0.639427	rs2504142	1	ENSG00000203496	39337	intergenic	9.077	7	8	8
rs11813263	10	38795447	A	G	0.4672	NA	NA	NA	0.637316	rs2504142	1	ENSG00000203496	40343	intergenic	NA	7	8	8
rs36183340	10	38795918	G	A	0.4622	NA	NA	NA	0.653252	rs2504142	1	ENSG00000203496	40814	intergenic	10.49	6	8	8
rs111052555	10	38796339	G	A	0.4622	NA	NA	NA	0.653252	rs2504142	1	ENSG00000203496	41235	intergenic	10.31	6	8	8
rs11011590	10	38797448	T	C	0.4622	NA	NA	NA	0.653252	rs2504142	1	ENSG00000203496	42344	intergenic	9.416	7	5	8
rs71500411	10	38798183	G	A	0.4622	NA	NA	NA	0.653252	rs2504142	1	ENSG00000203496	43079	intergenic	10.61	7	5	8
rs62639182	10	38798370	T	A	0.4622	NA	NA	NA	0.653252	rs2504142	1	ENSG00000203496	43266	intergenic	10.65	7	5	8
rs12773018	10	38798486	C	T	0.4682	NA	NA	NA	0.637665	rs2504142	1	ENSG00000203496	43382	intergenic	NA	NA	5	8
rs201912941	10	38798576	A	G	0.1938	NA	NA	NA	0.657165	rs2472160	1	ENSG00000203496	43472	intergenic	10.86	7	5	8
rs74209317	10	38798736	G	A	0.4672	NA	NA	NA	0.642575	rs2504142	1	ENSG00000203496	43632	intergenic	10.17	7	5	8
rs11011591	10	38799190	G	C	0.4622	NA	NA	NA	0.653252	rs2504142	1	ENSG00000203496	44086	intergenic	8.759	5	5	9
rs11011592	10	38799293	T	A	0.4622	NA	NA	NA	0.653252	rs2504142	1	ENSG00000203496	44189	intergenic	9.588	5	5	9
rs11011593	10	38799340	T	G	0.4632	NA	NA	NA	0.65178	rs2504142	1	ENSG00000203496	44236	intergenic	8.467	7	5	9
rs12416324	10	38799487	G	A	0.4622	NA	NA	NA	0.653252	rs2504142	1	ENSG00000203496	44383	intergenic	9.667	7	5	9
rs7071322	10	38800285	C	T	0.4622	NA	NA	NA	0.653252	rs2504142	1	ENSG00000203496	45181	intergenic	10.23	7	5	9
rs12256706	10	38800708	A	G	0.4672	NA	NA	NA	0.642575	rs2504142	1	ENSG00000203496	45604	intergenic	9.625	7	5	9
rs3045843	10	38800820	G	C	0.4672	NA	NA	NA	0.642575	rs2504142	1	ENSG00000203496	45716	intergenic	9.042	7	5	9
rs763806	10	38801009	A	G	0.4672	0.012	-0.1917	0.0763	0.642575	rs2504142	1	ENSG00000203496	45905	intergenic	9.749	6	5	8
rs112266918	10	38801158	T	TGAATG	0.4712	NA	NA	NA	0.630043	rs2504142	1	ENSG00000203496	46054	intergenic	NA	NA	5	8
rs4934955	10	38801438	C	T	0.4622	NA	NA	NA	0.653252	rs2504142	1	ENSG00000203496	46334	intergenic	9.883	7	5	9
rs146155487	10	38802239	A	G	0.159	NA	NA	NA	0.628641	rs2472160	1	ENSG00000203496	47135	intergenic	8.91	7	5	9
rs28692534	10	38802610	A	G	0.4205	0.002287	-0.2326	0.0763	0.781291	rs2504142	1	ENSG00000203496	47506	intergenic	10.14	7	5	9
rs12415158	10	38802948	A	G	0.2326	NA	NA	NA	0.63565	rs1535273	1	ENSG00000203496	47844	intergenic	9.489	6	5	9
rs12416559	10	38803130	A	T	0.2326	NA	NA	NA	0.63565	rs1535273	1	ENSG00000203496	48026	intergenic	11.41	7	5	9
rs112193252	10	38804294	T	G	0.2326	NA	NA	NA	0.63565	rs1535273	1	ENSG00000203496	49190	intergenic	9.176	5	5	8
rs201545128	10	38804525	G	GA	0.2356	NA	NA	NA	0.657984	rs1535273	1	ENSG00000203496	49421	intergenic	8.557	NA	5	8
rs10827875	10	38805115	C	T	0.4205	NA	NA	NA	0.781291	rs2504142	1	ENSG00000203496	50011	intergenic	9.502	7	5	8
rs7069766	10	38805239	C	T	0.4205	NA	NA	NA	0.781291	rs2504142	1	ENSG00000203496	50135	intergenic	9.543	7	5	8
rs7070205	10	38805474	C	T	0.4254	NA	NA	NA	0.764579	rs2504142	1	ENSG00000203496	50370	intergenic	9.899	7	5	8
rs7090356	10	38805941	A	G	0.4205	NA	NA	NA	0.781291	rs2504142	1	ENSG00000203496	50837	intergenic	10.09	7	5	8
rs373243649	10	38806604	C	T	0.159	NA	NA	NA	0.628641	rs2472160	1	ENSG00000203496	51500	intergenic	10.65	NA	5	8
rs10827876	10	38806839	A	G	0.4205	0.00315	0.2251	0.0762	0.781291	rs2504142	1	ENSG00000203496	51735	intergenic	9.374	7	5	8
rs374548184	10	38807469	CGAATG	C	0.3887	NA	NA	NA	0.672744	rs2504142	1	ENSG00000203496	52365	intergenic	NA	NA	5	8
rs7095936	10	38807525	A	G	0.4195	NA	NA	NA	0.776529	rs2504142	1	ENSG00000203496	52421	intergenic	9.261	7	5	8
rs111217051	10	38808718	C	G	0.159	NA	NA	NA	0.628641	rs2472160	1	ENSG00000203496	53614	intergenic	8.499	NA	8	8
rs111208474	10	38809165	A	C	0.2326	NA	NA	NA	0.63565	rs1535273	1	ENSG00000203496	54061	intergenic	9.756	5	5	8
rs12767694	10	38809911	G	A	0.4205	NA	NA	NA	0.781291	rs2504142	1	ENSG00000203496	54807	intergenic	10.08	7	1	8
rs7080351	10	38810878	T	G	0.4205	NA	NA	NA	0.781291	rs2504142	1	ENSG00000203496	55774	intergenic	8.41	5	8	8
rs11011604	10	38812010	G	C	0.4205	NA	NA	NA	0.781291	rs2504142	1	ENSG00000203496	56906	intergenic	8.064	7	8	9
rs11011607	10	38812392	T	C	0.4205	NA	NA	NA	0.781291	rs2504142	1	ENSG00000203496	57288	intergenic	9.89	7	8	9
rs111208487	10	38812486	A	G	0.2326	NA	NA	NA	0.63565	rs1535273	1	ENSG00000203496	57382	intergenic	9.414	6	8	9
rs10827879	10	38812520	A	G	0.4205	NA	NA	NA	0.781291	rs2504142	1	ENSG00000203496	57416	intergenic	10.91	7	8	9
rs111208493	10	38812626	A	G	0.2356	NA	NA	NA	0.657984	rs1535273	1	ENSG00000203496	57522	intergenic	10.38	7	8	8
rs111208494	10	38813121	C	G	0.2326	NA	NA	NA	0.63565	rs1535273	1	ENSG00000203496	58017	intergenic	7.691	6	8	8
rs111208496	10	38813395	A	G	0.2326	NA	NA	NA	0.63565	rs1535273	1	ENSG00000203496	58291	intergenic	10.93	7	8	8
rs10827882	10	38814369	A	T	0.4205	NA	NA	NA	0.781291	rs2504142	1	ENSG00000203496	59265	intergenic	12.29	6	8	8
rs200912796	10	38814582	C	A	0.4076	NA	NA	NA	0.783317	rs2504142	1	ENSG00000203496	59478	intergenic	NA	5	8	8
rs61839067	10	38814595	G	T	0.4165	NA	NA	NA	0.766095	rs2504142	1	ENSG00000203496	59491	intergenic	11.74	5	8	8
rs118199153	10	38814600	A	G	0.2286	NA	NA	NA	0.619815	rs1535273	1	ENSG00000203496	59496	intergenic	11.02	5	8	8
rs11011618	10	38814816	A	G	0.2336	NA	NA	NA	0.648708	rs1535273	1	ENSG00000203496	59712	intergenic	9.868	5	8	8
rs11011619	10	38815063	C	G	0.4205	NA	NA	NA	0.781291	rs2504142	1	ENSG00000203496	59959	intergenic	8.022	5	8	8
rs11011620	10	38815087	A	C	0.4205	NA	NA	NA	0.781291	rs2504142	1	ENSG00000203496	59983	intergenic	NA	5	8	8
rs78325640	10	38815221	A	T	0.3907	NA	NA	NA	0.702645	rs2504142	1	ENSG00000203496	60117	intergenic	NA	5	8	8
rs148719335	10	38815688	T	C	0.2326	NA	NA	NA	0.63565	rs1535273	1	ENSG00000203496	60584	intergenic	NA	7	8	8
rs113642100	10	38869176	G	T	0.4672	NA	NA	NA	0.642575	rs2504142	1	ABCD1P2	25373	intergenic	10.2	5	1	8
rs62640148	10	38870105	T	C	0.4622	NA	NA	NA	0.653252	rs2504142	1	ABCD1P2	24444	intergenic	9.842	7	5	9
rs12571158	10	38870565	C	T	0.4672	NA	NA	NA	0.642575	rs2504142	1	ABCD1P2	23984	intergenic	9.808	7	5	9
rs12573289	10	38870643	A	G	0.4622	NA	NA	NA	0.653252	rs2504142	1	ABCD1P2	23906	intergenic	9.456	7	5	9
rs11146698	10	38870749	G	A	0.4672	NA	NA	NA	0.642575	rs2504142	1	ABCD1P2	23800	intergenic	10.49	7	5	9
rs7080322	10	38871396	G	A	0.4682	NA	NA	NA	0.637665	rs2504142	1	ABCD1P2	23153	intergenic	NA	7	5	9
rs201753866	10	38871865	CG	C	0.4702	NA	NA	NA	0.631393	rs2504142	1	ABCD1P2	22684	intergenic	NA	NA	5	8
rs11146854	10	38872250	A	G	0.4622	NA	NA	NA	0.653252	rs2504142	1	ABCD1P2	22299	intergenic	10.12	7	7	8
rs11146855	10	38872329	A	G	0.4632	NA	NA	NA	0.646593	rs2504142	1	ABCD1P2	22220	intergenic	NA	6	7	8
rs10870445	10	38873013	A	C	0.4622	NA	NA	NA	0.653252	rs2504142	1	ABCD1P2	21536	intergenic	9.959	6	5	8
rs11146865	10	38873267	A	G	0.4622	NA	NA	NA	0.653252	rs2504142	1	ABCD1P2	21282	intergenic	9.247	7	5	8
rs11146866	10	38873308	A	T	0.4622	NA	NA	NA	0.653252	rs2504142	1	ABCD1P2	21241	intergenic	11.5	7	5	8
rs11146867	10	38873332	C	A	0.4622	NA	NA	NA	0.653252	rs2504142	1	ABCD1P2	21217	intergenic	8.857	7	5	8
rs62649586	10	38874030	G	A	0.4672	NA	NA	NA	0.642575	rs2504142	1	ABCD1P2	20519	intergenic	10.63	5	8	8
rs4070544	10	38874654	G	A	0.4672	NA	NA	NA	0.642575	rs2504142	1	ABCD1P2	19895	intergenic	10.38	NA	5	9
rs12415353	10	38874959	C	T	0.4712	NA	NA	NA	0.630043	rs2504142	1	ABCD1P2	19590	intergenic	NA	7	5	9
rs28971875	10	38875177	T	C	0.4612	NA	NA	NA	0.640067	rs2504142	1	ABCD1P2	19372	intergenic	9.632	7	5	9
rs12761215	10	38875290	G	T	0.4682	NA	NA	NA	0.639427	rs2504142	1	ABCD1P2	19259	intergenic	11.1	7	5	9
rs62649598	10	38875354	A	G	0.4622	NA	NA	NA	0.653252	rs2504142	1	ABCD1P2	19195	intergenic	9.899	6	5	9
rs34521006	10	38875907	C	CA	0.4642	NA	NA	NA	0.638649	rs2504142	1	ABCD1P2	18642	intergenic	NA	NA	5	9
rs7075889	10	38876419	T	C	0.4672	NA	NA	NA	0.642575	rs2504142	1	ABCD1P2	18130	intergenic	10.57	7	5	9
rs7090159	10	38876718	G	T	0.4632	NA	NA	NA	0.650044	rs2504142	1	ABCD1P2	17831	intergenic	10.35	7	5	9
rs7090163	10	38876730	C	T	0.4632	NA	NA	NA	0.650044	rs2504142	1	ABCD1P2	17819	intergenic	10.2	6	5	9
rs6560875	10	38876805	C	T	0.4652	NA	NA	NA	0.648417	rs2504142	1	ABCD1P2	17744	intergenic	NA	6	5	9
rs28840165	10	38877489	C	T	0.4622	NA	NA	NA	0.653252	rs2504142	1	ABCD1P2	17060	intergenic	10.19	7	5	9
rs11146903	10	38877764	G	A	0.4622	NA	NA	NA	0.653252	rs2504142	1	ABCD1P2	16785	intergenic	10.64	7	5	9
rs62649599	10	38879828	C	A	0.4622	NA	NA	NA	0.653252	rs2504142	1	ABCD1P2	14721	intergenic	8.334	7	5	9
rs11146609	10	38880489	T	C	0.4612	NA	NA	NA	0.654748	rs2504142	1	ABCD1P2	14060	intergenic	10.04	7	1	9
rs113201045	10	38880611	A	G	0.4622	NA	NA	NA	0.653252	rs2504142	1	ABCD1P2	13938	intergenic	10.34	6	5	9
rs529963479	10	38880762	T	A	0.4493	NA	NA	NA	0.640845	rs2504142	1	ABCD1P2	13787	intergenic	8.999	NA	5	9
rs80185942	10	38880766	A	G	0.4493	NA	NA	NA	0.640845	rs2504142	1	ABCD1P2	13783	intergenic	9.63	7	5	9
rs12774178	10	38881431	T	A	0.4672	NA	NA	NA	0.642575	rs2504142	1	ABCD1P2	13118	intergenic	9.705	6	5	8
rs145604998	10	38881463	C	A	0.4672	NA	NA	NA	0.642575	rs2504142	1	ABCD1P2	13086	intergenic	8.63	7	5	8
rs12763108	10	38881607	C	T	0.4672	NA	NA	NA	0.642575	rs2504142	1	ABCD1P2	12942	intergenic	10.7	7	1	8
rs62635570	10	38881646	G	A	0.4672	NA	NA	NA	0.642575	rs2504142	1	ABCD1P2	12903	intergenic	10.83	6	1	8
rs61840422	10	38881815	C	A	0.4672	NA	NA	NA	0.642575	rs2504142	1	ABCD1P2	12734	intergenic	8.59	7	1	8
rs12781136	10	38882380	T	A	0.4622	NA	NA	NA	0.653252	rs2504142	1	ABCD1P2	12169	intergenic	9.713	7	5	8
rs12778805	10	38882447	T	C	0.4622	NA	NA	NA	0.653252	rs2504142	1	ABCD1P2	12102	intergenic	10.01	7	5	9
rs12246481	10	38882461	C	A	0.4692	NA	NA	NA	0.636289	rs2504142	1	ABCD1P2	12088	intergenic	NA	7	5	9
rs7078488	10	38883470	C	T	0.4672	NA	NA	NA	0.642575	rs2504142	1	ABCD1P2	11079	intergenic	8.806	7	5	9
rs7068400	10	38883999	A	G	0.4672	NA	NA	NA	0.642575	rs2504142	1	ABCD1P2	10550	intergenic	6.644	6	5	9
rs7083618	10	38884667	C	T	0.4692	NA	NA	NA	0.636289	rs2504142	1	ABCD1P2	9882	intergenic	7.686	NA	5	9
rs10870374	10	38885429	G	A	0.4622	NA	NA	NA	0.653252	rs2504142	1	ABCD1P2	9120	intergenic	7.985	7	5	9
rs10870375	10	38885469	T	C	0.4622	NA	NA	NA	0.653252	rs2504142	1	ABCD1P2	9080	intergenic	6.877	7	5	9
rs11146682	10	38886805	A	G	0.4622	NA	NA	NA	0.653252	rs2504142	1	ABCD1P2	7744	intergenic	6.576	7	5	9
rs10870380	10	38886894	A	G	0.4622	NA	NA	NA	0.653252	rs2504142	1	ABCD1P2	7655	intergenic	6.556	6	5	9
rs55887920	10	38887738	C	G	0.4632	NA	NA	NA	0.650044	rs2504142	1	ABCD1P2	6811	intergenic	4.047	6	8	9
rs12358279	10	38888266	T	A	0.4632	NA	NA	NA	0.650044	rs2504142	1	ABCD1P2	6283	intergenic	6.779	7	8	9
rs11146704	10	38888268	G	T	0.4682	NA	NA	NA	0.639427	rs2504142	1	ABCD1P2	6281	intergenic	9.166	7	8	9
rs34855206	10	38888442	A	G	0.4622	NA	NA	NA	0.645049	rs2504142	1	ABCD1P2	6107	intergenic	8.241	NA	8	9
rs12258927	10	38888498	G	A	0.4682	NA	NA	NA	0.639427	rs2504142	1	ABCD1P2	6051	intergenic	1.491	7	8	9
rs4881557	10	38888795	A	T	0.4632	NA	NA	NA	0.650044	rs2504142	1	ABCD1P2	5754	intergenic	9.603	NA	1	9
rs7910011	10	38890011	C	T	0.4612	NA	NA	NA	0.646533	rs2504142	1	ABCD1P2	4538	intergenic	0.914	7	5	15
rs7917928	10	38890240	T	A	0.4592	NA	NA	NA	0.6319	rs2504142	1	ABCD1P2	4309	intergenic	0.125	7	5	15
rs7918343	10	38890571	G	A	0.4632	NA	NA	NA	0.650044	rs2504142	1	ABCD1P2	3978	intergenic	0.895	7	5	15
rs7910882	10	38890636	C	T	0.4682	NA	NA	NA	0.639427	rs2504142	1	ABCD1P2	3913	intergenic	1.902	6	9	15
rs11595175	10	38891261	T	A	0.4632	NA	NA	NA	0.650044	rs2504142	1	ABCD1P2	3288	intergenic	0.241	7	9	15
rs11592849	10	38891368	A	C	0.4632	NA	NA	NA	0.650044	rs2504142	1	ABCD1P2	3181	intergenic	1.765	6	9	15
rs3970148	10	38891602	C	T	0.4672	NA	NA	NA	0.637316	rs2504142	1	ABCD1P2	2947	intergenic	NA	NA	9	15
rs4070527	10	38893015	A	C	0.4632	NA	NA	NA	0.650044	rs2504142	1	ABCD1P2	1534	intergenic	2.031	NA	9	15
rs74184516	10	38893648	C	T	0.4414	NA	NA	NA	0.69994	rs2504142	1	ABCD1P2	0	upstream	NA	5	8	15
rs3970150	10	38894500	C	T	0.4642	NA	NA	NA	0.648585	rs2504142	1	ABCD1P2	0	upstream	3.666	NA	8	9
rs61841291	10	38894764	T	G	0.4692	NA	NA	NA	0.63806	rs2504142	1	ABCD1P2	0	ncRNA_intronic	2.528	5	8	9
rs7909126	10	38895537	G	A	0.4692	NA	NA	NA	0.63806	rs2504142	1	ABCD1P2	0	ncRNA_intronic	2.769	5	8	9
rs7912997	10	38896135	G	A	0.4642	NA	NA	NA	0.648585	rs2504142	1	ABCD1P2	0	ncRNA_intronic	3.845	5	8	9
rs61092355	10	38896369	A	G	0.1968	NA	NA	NA	0.646168	rs2472160	1	ABCD1P2	0	ncRNA_intronic	4.375	5	9	9
rs7924145	10	38896442	T	G	0.4642	NA	NA	NA	0.648585	rs2504142	1	ABCD1P2	0	ncRNA_intronic	1.637	5	9	9
rs76204933	10	38896747	G	A	0.4612	NA	NA	NA	0.637162	rs2504142	1	ABCD1P2	0	ncRNA_intronic	3.579	5	9	9
rs12359497	10	38896752	C	A	0.4612	NA	NA	NA	0.637162	rs2504142	1	ABCD1P2	0	ncRNA_intronic	1.534	5	9	9
rs7913830	10	38896777	G	A	0.4612	NA	NA	NA	0.637162	rs2504142	1	ABCD1P2	0	ncRNA_intronic	3.684	5	9	9
rs7921554	10	38898000	G	A	0.4692	NA	NA	NA	0.63806	rs2504142	1	ABCD1P2	0	ncRNA_exonic	2.188	5	8	9
rs10870442	10	38898171	A	G	0.4692	NA	NA	NA	0.63806	rs2504142	1	ABCD1P2	0	ncRNA_exonic	4.645	5	8	9
rs11146848	10	38898292	G	A	0.4642	NA	NA	NA	0.648585	rs2504142	1	ABCD1P2	0	ncRNA_exonic	1.838	5	8	9
rs11146849	10	38898344	C	T	0.4692	NA	NA	NA	0.63806	rs2504142	1	ABCD1P2	0	ncRNA_exonic	1.444	5	8	9
rs11146850	10	38898443	T	C	0.4642	NA	NA	NA	0.648585	rs2504142	1	ABCD1P2	0	ncRNA_exonic	5.895	5	8	9
rs11146851	10	38899402	T	G	0.4642	NA	NA	NA	0.648585	rs2504142	1	ABCD1P2	0	downstream	1.506	5	9	9
rs4881560	10	38899967	T	C	0.4642	NA	NA	NA	0.648585	rs2504142	1	ABCD1P2	1227	intergenic	3.442	5	9	15
rs7900077	10	38900336	C	T	0.4642	NA	NA	NA	0.648585	rs2504142	1	ABCD1P2	1596	intergenic	2.502	7	9	15
rs4881599	10	38900673	A	G	0.4642	NA	NA	NA	0.648585	rs2504142	1	ABCD1P2	1933	intergenic	2.235	6	9	15
rs4881600	10	38900737	G	A	0.4642	NA	NA	NA	0.648585	rs2504142	1	ABCD1P2	1997	intergenic	2.133	5	9	15
rs12359277	10	38900940	G	A	0.4642	NA	NA	NA	0.648585	rs2504142	1	ABCD1P2	2200	intergenic	0.834	5	9	15
rs11146852	10	38900956	A	G	0.4632	NA	NA	NA	0.650044	rs2504142	1	ABCD1P2	2216	intergenic	NA	5	9	15
rs10781611	10	38901477	G	A	0.4692	NA	NA	NA	0.63806	rs2504142	1	ABCD1P2	2737	intergenic	0.915	7	9	15
rs4070524	10	38901960	C	A	0.4692	NA	NA	NA	0.63806	rs2504142	1	ABCD1P2	3220	intergenic	0.448	NA	9	15
rs7093460	10	38902748	G	A	0.4692	NA	NA	NA	0.63806	rs2504142	1	ABCD1P2	4008	intergenic	1.289	6	9	15
rs11146853	10	38902921	C	T	0.4642	NA	NA	NA	0.648585	rs2504142	1	ABCD1P2	4181	intergenic	0.497	6	9	15
rs10870444	10	38903015	G	A	0.4692	NA	NA	NA	0.63806	rs2504142	1	ABCD1P2	4275	intergenic	0.95	7	9	15
rs7079129	10	38903472	G	C	0.4642	NA	NA	NA	0.648585	rs2504142	1	ABCD1P2	4732	intergenic	0.669	5	9	9
rs7090091	10	38903696	C	T	0.4642	NA	NA	NA	0.648585	rs2504142	1	ABCD1P2	4956	intergenic	0.556	5	9	9
rs7079558	10	38903881	T	G	0.4642	NA	NA	NA	0.648585	rs2504142	1	ABCD1P2	5141	intergenic	0.175	5	9	9
rs11146856	10	38904136	G	A	0.4642	NA	NA	NA	0.648585	rs2504142	1	ABCD1P2	5396	intergenic	1.426	5	9	9
rs11146857	10	38905070	G	A	0.4642	NA	NA	NA	0.648585	rs2504142	1	ABCD1P2	6330	intergenic	1.236	6	9	15
rs7077355	10	38905840	T	A	0.4642	NA	NA	NA	0.648585	rs2504142	1	ABCD1P2	7100	intergenic	0.129	6	9	15
rs7089329	10	38905961	A	G	0.4612	NA	NA	NA	0.638936	rs2504142	1	ABCD1P2	7221	intergenic	0.558	7	9	15
rs7077540	10	38906014	G	A	0.4602	NA	NA	NA	0.635779	rs2504142	1	ABCD1P2	7274	intergenic	1.602	6	9	15
rs34073612	10	38906436	G	GA	0.4642	NA	NA	NA	0.648585	rs2504142	1	ABCD1P2	7696	intergenic	0.112	NA	9	15
rs11594048	10	38906567	A	G	0.4642	NA	NA	NA	0.648585	rs2504142	1	ABCD1P2	7827	intergenic	0.861	7	9	15
rs7899169	10	38906940	C	T	0.4642	NA	NA	NA	0.648585	rs2504142	1	ABCD1P2	8200	intergenic	0.702	6	9	15
rs7906299	10	38909099	G	C	0.4215	NA	NA	NA	0.778255	rs2504142	1	ABCD1P2	10359	intergenic	1.154	6	9	15
rs7906304	10	38909111	A	C	0.4215	NA	NA	NA	0.778255	rs2504142	1	ABCD1P2	10371	intergenic	1.979	7	9	15
rs7903061	10	38909133	A	G	0.4215	NA	NA	NA	0.778255	rs2504142	1	ABCD1P2	10393	intergenic	1.144	6	9	15
rs117047576	10	38909335	T	G	0.1541	NA	NA	NA	0.610537	rs2472160	1	ABCD1P2	10595	intergenic	0.376	6	9	15
rs67284408	10	38909483	CT	C	0.4662	NA	NA	NA	0.643977	rs2504142	1	ABCD1P2	10743	intergenic	1.087	NA	9	15
rs12778433	10	38912397	A	C	0.4215	NA	NA	NA	0.778255	rs2504142	1	ABCD1P2	13657	intergenic	5.375	6	9	15
rs7920340	10	38912721	G	C	0.4215	NA	NA	NA	0.778255	rs2504142	1	ABCD1P2	13981	intergenic	1.381	6	9	15
rs4290155	10	38913071	T	C	0.4215	NA	NA	NA	0.778255	rs2504142	1	ABCD1P2	14331	intergenic	12.94	5	9	15
rs4501920	10	38913110	G	A	0.4215	NA	NA	NA	0.778255	rs2504142	1	ABCD1P2	14370	intergenic	9.873	5	9	15
rs4367872	10	38913345	C	T	0.4215	NA	NA	NA	0.778255	rs2504142	1	ABCD1P2	14605	intergenic	2.909	5	9	15
rs55879831	10	38914917	T	C	0.4205	NA	NA	NA	0.773481	rs2504142	1	PABPC1P12	14122	intergenic	NA	7	9	15
rs191972561	10	38915042	A	T	0.16	NA	NA	NA	0.622541	rs2472160	1	PABPC1P12	13997	intergenic	5.6	6	9	15
rs4617513	10	38916998	T	C	0.4215	NA	NA	NA	0.778255	rs2504142	1	PABPC1P12	12041	intergenic	0.863	6	9	15
rs10870448	10	38918365	G	A	0.4215	NA	NA	NA	0.778255	rs2504142	1	PABPC1P12	10674	intergenic	6.14	6	9	15
rs10870450	10	38918435	C	A	0.4215	NA	NA	NA	0.778255	rs2504142	1	PABPC1P12	10604	intergenic	5.771	7	9	15
rs11146870	10	38918600	T	A	0.4215	NA	NA	NA	0.778255	rs2504142	1	PABPC1P12	10439	intergenic	3.378	6	9	15
rs1962178	10	38920085	G	A	0.4215	NA	NA	NA	0.778255	rs2504142	1	PABPC1P12	8954	intergenic	5.417	NA	9	15
rs11146871	10	38920365	A	C	0.4215	NA	NA	NA	0.778255	rs2504142	1	PABPC1P12	8674	intergenic	6.594	7	9	15
rs11146873	10	38920875	T	C	0.4215	NA	NA	NA	0.778255	rs2504142	1	PABPC1P12	8164	intergenic	9.168	6	9	15
rs7080589	10	38921352	G	C	0.4215	NA	NA	NA	0.778255	rs2504142	1	PABPC1P12	7687	intergenic	1.273	7	9	15
rs4070439	10	38922106	A	G	0.159	NA	NA	NA	0.628641	rs2472160	1	PABPC1P12	6933	intergenic	0.09	NA	9	15
rs11146878	10	38923128	A	T	0.4205	NA	NA	NA	0.782196	rs2504142	1	PABPC1P12	5911	intergenic	7.971	6	9	15
rs12771787	10	38923558	G	A	0.4205	NA	NA	NA	0.782196	rs2504142	1	PABPC1P12	5481	intergenic	15.7	6	9	15
rs11819087	10	38925069	C	G	0.4195	NA	NA	NA	0.778364	rs2504142	1	PABPC1P12	3970	intergenic	0.073	7	9	15
rs11146880	10	38925179	T	C	0.4115	NA	NA	NA	0.747659	rs2504142	1	PABPC1P12	3860	intergenic	0.901	7	9	15
rs146815512	10	38926746	A	T	0.159	NA	NA	NA	0.628641	rs2472160	1	PABPC1P12	2293	intergenic	6.589	6	9	15
rs4881604	10	38931255	A	T	0.4215	NA	NA	NA	0.778255	rs2504142	1	PABPC1P12	0	downstream	5.659	7	9	15
rs59362347	10	38931648	G	GA	0.4215	NA	NA	NA	0.778255	rs2504142	1	PABPC1P12	0	downstream	9.859	NA	9	15
rs10870452	10	38931737	T	A	0.4175	NA	NA	NA	0.750529	rs2504142	1	PABPC1P12	0	downstream	2.73	6	9	15
rs182311909	10	38931786	A	G	0.175	NA	NA	NA	0.719277	rs2472160	1	PABPC1P12	0	downstream	2.607	6	9	15
rs189719368	10	38932506	A	G	0.1571	NA	NA	NA	0.616414	rs2472160	1	PABPC1P12	1293	intergenic	NA	7	9	15
rs4442468	10	38933971	T	C	0.4095	NA	NA	NA	0.753345	rs2504142	1	SLC9B1P3	0	downstream	10.74	7	9	15
rs9664976	10	38934314	G	C	0.16	NA	NA	NA	0.622541	rs2472160	1	SLC9B1P3	0	ncRNA_exonic	8.65	7	9	15
rs11146883	10	38934655	A	G	0.4205	NA	NA	NA	0.773481	rs2504142	1	SLC9B1P3	0	ncRNA_intronic	0.249	7	9	15
rs60271802	10	38935543	T	A	0.4215	NA	NA	NA	0.778255	rs2504142	1	SLC9B1P3	0	ncRNA_intronic	4.154	7	9	15
rs2145649	10	38936679	C	T	0.4215	NA	NA	NA	0.778255	rs2504142	1	SLC9B1P3	0	ncRNA_intronic	5.864	7	9	15
rs4242811	10	38936725	G	C	0.4225	NA	NA	NA	0.774329	rs2504142	1	SLC9B1P3	0	ncRNA_intronic	1.278	6	9	15
rs4070337	10	38938479	A	C	0.4195	NA	NA	NA	0.76872	rs2504142	1	SLC9B1P3	0	ncRNA_exonic	NA	NA	9	15
rs11146893	10	38942224	T	C	0.4185	NA	NA	NA	0.763974	rs2504142	1	SLC9B1P3	0	ncRNA_intronic	1.395	7	9	15
rs3970209	10	38950426	G	A	0.4195	NA	NA	NA	0.776529	rs2504142	1	SLC9B1P3	0	ncRNA_intronic	2.528	NA	9	15
rs4469809	10	38950697	A	C	0.4215	NA	NA	NA	0.778255	rs2504142	1	SLC9B1P3	0	ncRNA_intronic	0.134	7	9	15
rs4881616	10	38951801	A	G	0.4215	NA	NA	NA	0.778255	rs2504142	1	SLC9B1P3	0	ncRNA_intronic	1.177	7	9	15
rs140699022	10	38951831	T	C	0.1541	NA	NA	NA	0.610537	rs2472160	1	SLC9B1P3	0	ncRNA_intronic	1.305	7	9	15
rs2168603	10	38951875	T	C	0.4125	NA	NA	NA	0.735781	rs2504142	1	SLC9B1P3	0	ncRNA_intronic	1.267	NA	9	15
rs12415983	10	38954757	A	G	0.175	NA	NA	NA	0.719277	rs2472160	1	SLC9B1P3	0	ncRNA_intronic	0.815	7	9	15
rs11817872	10	38955728	T	A	0.4215	NA	NA	NA	0.778255	rs2504142	1	SLC9B1P3	0	ncRNA_intronic	0.584	NA	9	15
rs7092837	10	38958985	T	C	0.4215	NA	NA	NA	0.778255	rs2504142	1	SLC9B1P3	0	ncRNA_intronic	0.105	6	9	15
rs111849165	10	38959289	G	C	0.4205	NA	NA	NA	0.773481	rs2504142	1	SLC9B1P3	0	ncRNA_intronic	NA	6	9	15
rs4474704	10	38959877	T	A	0.4215	NA	NA	NA	0.770482	rs2504142	1	SLC9B1P3	0	ncRNA_intronic	NA	6	9	15
rs10870457	10	38960870	G	C	0.4215	NA	NA	NA	0.778255	rs2504142	1	SLC9B1P3	0	ncRNA_intronic	11.48	7	9	15
rs11146906	10	38963990	A	G	0.4215	NA	NA	NA	0.778255	rs2504142	1	SLC9B1P3	0	ncRNA_intronic	0.95	7	9	15
rs4102346	10	38964736	C	T	0.4185	NA	NA	NA	0.763974	rs2504142	1	SLC9B1P3	0	ncRNA_intronic	7.234	NA	9	15
rs115144286	10	38965038	A	G	0.16	NA	NA	NA	0.622541	rs2472160	1	SLC9B1P3	0	ncRNA_exonic	7.451	6	9	15
rs7912586	10	38965702	A	C	0.4215	NA	NA	NA	0.778255	rs2504142	1	SLC9B1P3	0	ncRNA_intronic	12.54	7	9	15
rs3878088	10	38966565	A	C	0.4215	NA	NA	NA	0.771445	rs2504142	1	SLC9B1P3	0	ncRNA_intronic	NA	NA	9	15
rs3878089	10	38966925	C	T	0.4264	NA	NA	NA	0.761731	rs2504142	1	SLC9B1P3	0	ncRNA_intronic	1.904	NA	9	15
rs77162230	10	38967260	G	T	0.4215	NA	NA	NA	0.778255	rs2504142	1	SLC9B1P3	0	ncRNA_intronic	0.267	6	9	15
rs143819657	10	38967996	G	A	0.174	NA	NA	NA	0.725423	rs2472160	1	SLC9B1P3	0	ncRNA_intronic	4.734	6	9	15
rs2034873	10	38968973	G	A	0.4215	NA	NA	NA	0.778255	rs2504142	1	SLC9B1P3	0	ncRNA_intronic	3.048	NA	8	15
rs10400096	10	38970145	T	A	0.4215	NA	NA	NA	0.778255	rs2504142	1	SLC9B1P3	0	ncRNA_intronic	0.756	7	9	15
rs11146595	10	38971860	A	G	0.4215	NA	NA	NA	0.778255	rs2504142	1	SLC9B1P3	0	ncRNA_intronic	0.911	6	9	15
rs11516903	10	38973256	T	C	0.4215	NA	NA	NA	0.778255	rs2504142	1	SLC9B1P3	0	ncRNA_intronic	1.148	7	9	15
rs75559027	10	38973428	C	G	0.159	NA	NA	NA	0.628641	rs2472160	1	SLC9B1P3	0	ncRNA_intronic	0.085	NA	9	15
rs7914116	10	38973977	G	A	0.4215	NA	NA	NA	0.778255	rs2504142	1	SLC9B1P3	0	ncRNA_intronic	0.747	6	9	15
rs10870356	10	38975586	A	G	0.4215	NA	NA	NA	0.778255	rs2504142	1	SLC9B1P3	0	ncRNA_intronic	2.182	7	9	15
rs56179218	10	38975691	C	A	0.1541	NA	NA	NA	0.610537	rs2472160	1	SLC9B1P3	0	ncRNA_intronic	4.332	7	9	15
rs11146598	10	38975823	T	G	0.4205	NA	NA	NA	0.773481	rs2504142	1	SLC9B1P3	0	ncRNA_intronic	NA	6	9	15
rs60113152	10	38976082	C	T	0.4215	NA	NA	NA	0.778255	rs2504142	1	SLC9B1P3	0	ncRNA_intronic	6.339	6	9	15
rs11146599	10	38976859	T	G	0.4215	NA	NA	NA	0.778255	rs2504142	1	SLC9B1P3	0	ncRNA_intronic	1.294	6	9	15
rs3878064	10	38977788	G	A	0.4215	NA	NA	NA	0.778255	rs2504142	1	SLC9B1P3	0	ncRNA_intronic	2.92	NA	9	15
rs11146600	10	38978651	A	T	0.4205	NA	NA	NA	0.773481	rs2504142	1	SLC9B1P3	0	ncRNA_intronic	11.02	6	9	15
rs10870360	10	38979184	T	G	0.4215	NA	NA	NA	0.778255	rs2504142	1	SLC9B1P3	0	ncRNA_intronic	2.395	6	9	15
rs10781590	10	38979370	G	C	0.4215	NA	NA	NA	0.778255	rs2504142	1	SLC9B1P3	0	ncRNA_intronic	10.61	6	9	15
rs11146602	10	38979718	A	G	0.4215	NA	NA	NA	0.778255	rs2504142	1	SLC9B1P3	0	ncRNA_intronic	7.608	7	9	15
rs10870361	10	38980103	A	C	0.4205	NA	NA	NA	0.773481	rs2504142	1	SLC9B1P3	0	ncRNA_intronic	1.273	6	9	15
rs7098816	10	38981166	C	A	0.4215	NA	NA	NA	0.778255	rs2504142	1	SLC9B1P3	0	ncRNA_intronic	0.631	6	9	15
rs2310246	10	38982301	G	A	0.4215	NA	NA	NA	0.778255	rs2504142	1	SLC9B1P3	0	upstream	9.499	NA	9	15
rs7902168	10	38985163	A	C	0.4215	NA	NA	NA	0.778255	rs2504142	1	SLC9B1P3	2964	intergenic	12.75	6	9	15
rs7921158	10	38985322	C	G	0.4215	NA	NA	NA	0.778255	rs2504142	1	SLC9B1P3	3123	intergenic	1.223	6	9	15
rs4088498	10	38988813	T	G	0.4215	NA	NA	NA	0.778255	rs2504142	1	ACTR3BP5	0	upstream	0.467	NA	9	15
rs7067948	10	38991560	C	G	0.159	NA	NA	NA	0.628641	rs2472160	1	ACTR3BP5	0	downstream	1.187	6	9	15
rs35712427	10	38991856	G	GA	0.4225	NA	NA	NA	0.774329	rs2504142	1	ACTR3BP5	0	downstream	3.8	NA	9	15
rs3878068	10	38993242	A	C	0.4215	NA	NA	NA	0.778255	rs2504142	1	ACTR3BP5	1886	intergenic	6.536	NA	9	15
rs11146617	10	38993605	C	G	0.4215	0.001304	0.2455	0.0764	0.778255	rs2504142	1	ACTR3BP5	2249	intergenic	0.19	7	9	15
rs11593645	10	38995397	A	G	0.4205	0.001046	0.2505	0.0764	0.773481	rs2504142	1	ACTR3BP5	4041	intergenic	5.643	6	9	15
rs61017861	10	38996468	G	C	0.159	NA	NA	NA	0.628641	rs2472160	1	ACTR3BP5	5112	intergenic	1.848	7	9	15
rs10870363	10	38996500	A	C	0.4235	NA	NA	NA	0.771364	rs2504142	1	ACTR3BP5	5144	intergenic	0.048	7	9	15
rs11146622	10	38996510	C	G	0.4225	NA	NA	NA	0.775268	rs2504142	1	ACTR3BP5	5154	intergenic	0.088	7	9	15
rs2124817	10	38996686	A	C	0.4225	NA	NA	NA	0.775268	rs2504142	1	ACTR3BP5	5330	intergenic	3.611	NA	9	15
rs4611131	10	38997368	A	G	0.173	NA	NA	NA	0.718439	rs2472160	1	ACTR3BP5	6012	intergenic	7.648	7	9	15
rs4258304	10	38997413	T	C	0.4215	NA	NA	NA	0.770482	rs2504142	1	ACTR3BP5	6057	intergenic	0.236	7	9	15
rs7478095	10	38997645	A	G	0.4225	NA	NA	NA	0.775268	rs2504142	1	ACTR3BP5	6289	intergenic	4.571	7	9	15
rs9702293	10	38999969	A	G	0.4056	NA	NA	NA	0.715062	rs2504142	1	CHEK2P5	6357	intergenic	2.241	7	9	15
rs11146635	10	39000997	T	C	0.4225	NA	NA	NA	0.775268	rs2504142	1	CHEK2P5	5329	intergenic	1.561	6	9	15
rs2310213	10	39005328	T	C	0.4215	NA	NA	NA	0.778255	rs2504142	1	CHEK2P5	0	upstream	6.087	NA	9	15
rs3878069	10	39006616	T	G	0.4225	0.0009702	0.2512	0.0761	0.775268	rs2504142	1	CHEK2P5	0	ncRNA_intronic	0.554	NA	9	15
rs10781594	10	39007246	A	C	0.4225	0.000955	0.2516	0.0762	0.775268	rs2504142	1	CHEK2P5	0	ncRNA_intronic	4.61	7	9	15
rs10870365	10	39007467	A	G	0.4225	0.000962	-0.2513	0.0761	0.775268	rs2504142	1	CHEK2P5	0	ncRNA_intronic	3.626	7	9	15
rs545173875	10	39007937	TA	T	0.4433	NA	NA	NA	0.66771	rs2504142	1	CHEK2P5	0	ncRNA_intronic	NA	NA	9	15
rs144739665	10	39008680	A	G	0.172	NA	NA	NA	0.711499	rs2472160	1	CHEK2P5	0	ncRNA_intronic	6.593	6	9	15
rs4092383	10	39010890	T	C	0.4095	NA	NA	NA	0.729675	rs2504142	1	CHEK2P5	0	ncRNA_intronic	5.844	NA	9	15
rs4092373	10	39011495	T	C	0.4225	NA	NA	NA	0.775268	rs2504142	1	CHEK2P5	0	ncRNA_intronic	3.837	NA	9	15
rs10870366	10	39011707	A	C	0.4215	NA	NA	NA	0.770482	rs2504142	1	CHEK2P5	0	ncRNA_intronic	1.321	7	9	15
rs35515734	10	39011713	AT	A	0.4215	NA	NA	NA	0.778255	rs2504142	1	CHEK2P5	0	ncRNA_intronic	NA	NA	9	15
rs11598775	10	39013989	A	G	0.4225	0.001085	0.2487	0.0761	0.775268	rs2504142	1	CHEK2P5	1629	intergenic	1.888	6	9	15
rs11598938	10	39014756	T	G	0.4225	NA	NA	NA	0.775268	rs2504142	1	CHEK2P5	2396	intergenic	0.633	7	9	15
rs76720363	10	39019326	A	G	0.4254	NA	NA	NA	0.764579	rs2504142	1	CHEK2P5	6966	intergenic	3.286	6	9	15
rs11598737	10	39019738	A	G	0.4254	NA	NA	NA	0.764579	rs2504142	1	CHEK2P5	7378	intergenic	2.171	7	9	15
rs7082777	10	39020312	G	A	0.4254	NA	NA	NA	0.764579	rs2504142	1	CHEK2P5	7952	intergenic	4.668	7	9	15
rs112638246	10	39021119	T	TTACA	0.4254	NA	NA	NA	0.764579	rs2504142	1	CHEK2P5	8759	intergenic	3.49	NA	9	15
rs9314881	10	39022316	G	C	0.4254	NA	NA	NA	0.764579	rs2504142	1	CHEK2P5	9956	intergenic	4.446	7	9	15
rs10870367	10	39023046	A	G	0.4274	0.0002532	0.2649	0.0724	0.756885	rs2504142	1	CHEK2P5	10686	intergenic	4.093	7	9	9
rs10870368	10	39023068	A	G	0.4245	0.0002081	-0.2688	0.0725	0.759755	rs2504142	1	CHEK2P5	10708	intergenic	NA	5	9	9
rs11146647	10	39023648	A	G	0.4254	0.0002308	0.2669	0.0725	0.764579	rs2504142	1	CHEK2P5	11288	intergenic	11.36	5	8	9
rs12775240	10	39023734	A	G	0.4245	0.0002572	0.2668	0.073	0.759755	rs2504142	1	CHEK2P5	11374	intergenic	4.7	5	8	9
rs7099736	10	39025161	A	C	0.4254	NA	NA	NA	0.764579	rs2504142	1	CHEK2P5	12801	intergenic	NA	6	9	15
rs4881556	10	39026246	T	G	0.4254	NA	NA	NA	0.764579	rs2504142	1	CHEK2P5	13886	intergenic	0.061	6	9	15
rs2124813	10	39027546	G	A	0.4135	NA	NA	NA	0.756145	rs2504142	1	CHEK2P5	15186	intergenic	0.959	NA	9	15
rs2168599	10	39027702	T	C	0.4254	0.0002202	0.2631	0.0712	0.764579	rs2504142	1	CHEK2P5	15342	intergenic	1.012	NA	9	15
rs12098551	10	39028182	T	G	0.4254	NA	NA	NA	0.764579	rs2504142	1	CHEK2P5	15822	intergenic	0.171	7	9	15
rs36041307	10	39030667	T	C	0.4254	NA	NA	NA	0.764579	rs2504142	1	CHEK2P5	18307	intergenic	0.696	NA	8	15
rs7094744	10	39032262	A	G	0.4254	NA	NA	NA	0.764579	rs2504142	1	CHEK2P5	19902	intergenic	2.391	5	8	9
rs7085456	10	39032467	A	T	0.4254	NA	NA	NA	0.764579	rs2504142	1	CHEK2P5	20107	intergenic	4.925	7	8	9
rs7074746	10	39032666	A	C	0.4254	NA	NA	NA	0.764579	rs2504142	1	CHEK2P5	20306	intergenic	4.031	5	8	9
rs12776486	10	39032720	A	G	0.4254	NA	NA	NA	0.764579	rs2504142	1	CHEK2P5	20360	intergenic	2.098	5	8	9
rs12781654	10	39032853	A	G	0.4254	NA	NA	NA	0.764579	rs2504142	1	CHEK2P5	20493	intergenic	3.659	7	8	9
rs56317655	10	39033087	A	G	0.1581	NA	NA	NA	0.623314	rs2472160	1	CHEK2P5	20727	intergenic	2.724	5	8	9
rs10870372	10	39033627	T	C	0.4254	0.0001869	0.2686	0.0719	0.764579	rs2504142	1	CHEK2P5	21267	intergenic	2.54	7	8	9
rs10870373	10	39033733	T	C	0.4254	NA	NA	NA	0.764579	rs2504142	1	CHEK2P5	21373	intergenic	3.722	7	8	9
rs145340386	10	39034688	T	C	0.16	NA	NA	NA	0.622541	rs2472160	1	ENSG00000227679	20538	intergenic	5.445	5	8	9
rs72802033	10	39034718	A	G	0.16	NA	NA	NA	0.622541	rs2472160	1	ENSG00000227679	20508	intergenic	6.681	5	8	9
rs35487036	10	39035079	T	C	0.4254	0.000163	0.2702	0.0717	0.764579	rs2504142	1	ENSG00000227679	20147	intergenic	6.587	NA	8	9
rs35190519	10	39035207	A	T	0.4254	0.0001632	0.2703	0.0717	0.764579	rs2504142	1	ENSG00000227679	20019	intergenic	8.647	6	8	9
rs10870376	10	39036305	A	C	0.4245	0.0002048	0.2715	0.0731	0.759755	rs2504142	1	ENSG00000227679	18921	intergenic	0.589	7	9	15
rs12771745	10	39037847	T	A	0.4254	NA	NA	NA	0.764579	rs2504142	1	ENSG00000227679	17379	intergenic	0.314	7	9	15
rs12778167	10	39037990	C	T	0.4254	NA	NA	NA	0.764579	rs2504142	1	ENSG00000227679	17236	intergenic	NA	7	9	15
rs11146663	10	39038489	T	G	0.4254	NA	NA	NA	0.764579	rs2504142	1	ENSG00000227679	16737	intergenic	0.094	6	9	15
rs11146667	10	39040177	A	G	0.4235	NA	NA	NA	0.756974	rs2504142	1	ENSG00000227679	15049	intergenic	0.897	7	9	15
rs11146670	10	39040481	T	C	0.4254	NA	NA	NA	0.764579	rs2504142	1	ENSG00000227679	14745	intergenic	0.603	6	9	15
rs547997727	10	39041853	C	T	0.159	NA	NA	NA	0.617218	rs2472160	1	ENSG00000227679	13373	intergenic	0.452	NA	9	15
rs9663234	10	39042256	C	T	0.4175	NA	NA	NA	0.735054	rs2504142	1	ENSG00000227679	12970	intergenic	0.316	5	9	15
rs9731036	10	39045041	T	C	0.4254	NA	NA	NA	0.764579	rs2504142	1	ENSG00000227679	10185	intergenic	0.499	7	9	15
rs34068619	10	39045424	T	C	0.4254	NA	NA	NA	0.764579	rs2504142	1	ENSG00000227679	9802	intergenic	0.821	NA	9	15
rs34351918	10	39045594	G	A	0.4254	NA	NA	NA	0.764579	rs2504142	1	ENSG00000227679	9632	intergenic	0.442	NA	9	15
rs66894791	10	39046102	A	AT	0.4254	NA	NA	NA	0.764579	rs2504142	1	ENSG00000227679	9123	intergenic	NA	NA	9	15
rs9663114	10	39046580	T	G	0.4254	NA	NA	NA	0.764579	rs2504142	1	ENSG00000227679	8646	intergenic	0.249	7	9	15
rs115894705	10	39047971	G	T	0.159	NA	NA	NA	0.617218	rs2472160	1	ENSG00000227679	7255	intergenic	1.026	5	9	15
rs3878076	10	39049672	A	G	0.4254	0.0001299	0.2787	0.0728	0.764579	rs2504142	1	ENSG00000227679	5554	intergenic	4.251	NA	9	15
rs12146186	10	39050719	A	C	0.4245	0.0001219	0.2804	0.073	0.767474	rs2504142	1	ENSG00000227679	4507	intergenic	4.99	6	9	15
rs4881571	10	39050877	T	C	0.4254	NA	NA	NA	0.764579	rs2504142	1	ENSG00000227679	4349	intergenic	3.842	7	9	15
rs4070031	10	39051536	C	T	0.4254	NA	NA	NA	0.764579	rs2504142	1	ENSG00000227679	3690	intergenic	2.082	NA	9	15
rs1824132	10	39051978	A	G	0.4254	0.0001243	0.2798	0.0729	0.764579	rs2504142	1	ENSG00000227679	3248	intergenic	0.87	NA	9	15
rs3878077	10	39052174	C	G	0.4235	NA	NA	NA	0.754945	rs2504142	1	ENSG00000227679	3052	intergenic	NA	6	9	15
rs3878078	10	39052319	A	G	0.4254	NA	NA	NA	0.764579	rs2504142	1	ENSG00000227679	2907	intergenic	0.967	NA	9	15
rs143515987	10	39054230	T	C	0.16	NA	NA	NA	0.622541	rs2472160	1	ENSG00000227679	0	downstream	1.124	7	9	15
rs7914656	10	39056103	A	G	0.4254	NA	NA	NA	0.764579	rs2504142	1	ENSG00000227679	0	upstream	2.004	6	9	15
rs7915376	10	39056579	A	G	0.4274	NA	NA	NA	0.757897	rs2504142	1	ENSG00000227679	0	upstream	1.596	7	9	15
rs11597333	10	39057142	A	G	0.4254	0.0001373	-0.2784	0.073	0.764579	rs2504142	1	ENSG00000227679	1520	intergenic	0.943	7	9	15
rs11594837	10	39057721	A	G	0.4254	NA	NA	NA	0.764579	rs2504142	1	ENSG00000227679	2099	intergenic	1.329	7	9	15
rs11146690	10	39058308	A	G	0.4254	NA	NA	NA	0.764579	rs2504142	1	ENSG00000227679	2686	intergenic	1.231	7	9	15
rs11815714	10	39059249	G	A	0.4245	NA	NA	NA	0.760757	rs2504142	1	ENSG00000227679	3627	intergenic	NA	6	9	15
rs537843052	10	39060868	T	A	0.16	NA	NA	NA	0.622541	rs2472160	1	ENSG00000227679	5246	intergenic	0.992	NA	9	15
rs11146700	10	39061925	T	C	0.4254	7.828e-05	0.2847	0.0721	0.764579	rs2504142	1	ENSG00000227679	6303	intergenic	0.484	6	9	15
rs11146701	10	39062269	A	G	0.4254	0.0001118	0.2773	0.0718	0.764579	rs2504142	1	ENSG00000227679	6647	intergenic	0.717	7	9	15
rs11146703	10	39062967	T	A	0.4245	NA	NA	NA	0.760757	rs2504142	1	ENSG00000227679	7345	intergenic	0.118	6	9	15
rs12414177	10	39063876	A	G	0.175	NA	NA	NA	0.719277	rs2472160	1	ENSG00000227679	8254	intergenic	0.347	7	9	15
rs10870396	10	39063969	T	C	0.4254	9.319e-05	0.2805	0.0718	0.764579	rs2504142	1	ENSG00000227679	8347	intergenic	0.417	7	9	15
rs146044601	10	39064510	A	T	0.16	NA	NA	NA	0.622541	rs2472160	1	ENSG00000227679	8888	intergenic	1.035	6	9	15
rs10870397	10	39064636	A	G	0.4264	NA	NA	NA	0.761731	rs2504142	1	ENSG00000227679	9014	intergenic	2.435	7	9	15
rs11146710	10	39066855	T	G	0.4185	NA	NA	NA	0.731094	rs2504142	1	ENSG00000233832	9280	intergenic	0.075	7	9	15
rs11146712	10	39067244	T	C	0.4254	NA	NA	NA	0.764579	rs2504142	1	ENSG00000233832	8891	intergenic	0.446	7	9	15
rs7073706	10	39069852	A	T	0.4245	7.954e-05	0.2801	0.071	0.759755	rs2504142	1	ENSG00000233832	6283	intergenic	3.18	7	9	15
rs3870407	10	39071414	A	G	0.4254	6.569e-05	0.2831	0.0709	0.764579	rs2504142	1	ENSG00000233832	4721	intergenic	1.037	NA	9	15
rs7094518	10	39075616	A	G	0.4254	6.574e-05	-0.2805	0.0703	0.764579	rs2504142	1	ENSG00000233832	0	upstream	0.614	6	5	15
rs201559392	10	39077477	A	ATCCAT	0.4235	NA	NA	NA	0.756974	rs2504142	1	ENSG00000233832	1238	intergenic	NA	NA	8	8
rs10870404	10	39078294	A	G	0.4235	NA	NA	NA	0.749353	rs2504142	1	ENSG00000233832	2055	intergenic	NA	7	8	8
rs10870405	10	39078505	C	A	0.4225	NA	NA	NA	0.766564	rs2504142	1	ENSG00000233832	2266	intergenic	8.487	7	8	8
rs11146726	10	39079093	T	C	0.4254	NA	NA	NA	0.764579	rs2504142	1	ENSG00000233832	2854	intergenic	NA	7	8	8
rs201557100	10	39080346	T	C	0.16	NA	NA	NA	0.622541	rs2472160	1	ENSG00000233832	4107	intergenic	9.882	7	8	8
rs7086706	10	39080765	T	C	0.4254	NA	NA	NA	0.764579	rs2504142	1	ENSG00000233832	4526	intergenic	10.69	7	8	8
rs4070182	10	39081487	T	A	0.4254	NA	NA	NA	0.764579	rs2504142	1	ENSG00000233832	5248	intergenic	9.378	7	8	8
rs4070181	10	39082170	T	C	0.4254	NA	NA	NA	0.764579	rs2504142	1	ENSG00000233832	5931	intergenic	9.696	NA	8	8
rs4070179	10	39082245	A	G	0.4254	NA	NA	NA	0.764579	rs2504142	1	ENSG00000233832	6006	intergenic	9.782	NA	8	8
rs12771151	10	39084270	A	G	0.4264	NA	NA	NA	0.760724	rs2504142	1	ENSG00000233832	8031	intergenic	8.429	7	8	8
rs56153905	10	39084405	T	C	0.16	NA	NA	NA	0.622541	rs2472160	1	ENSG00000233832	8166	intergenic	9.351	7	8	8
rs113922471	10	39085004	A	ATTCCATTCCG	0.4215	NA	NA	NA	0.749518	rs2504142	1	ENSG00000233832	8765	intergenic	NA	NA	8	8
rs61147424	10	39085418	T	C	0.4254	NA	NA	NA	0.764579	rs2504142	1	ENSG00000233832	9179	intergenic	9.959	5	8	8
rs12773618	10	39085587	T	C	0.4254	NA	NA	NA	0.764579	rs2504142	1	ENSG00000233832	9348	intergenic	9.086	5	8	8
rs200741597	10	39085614	C	T	0.175	NA	NA	NA	0.719277	rs2472160	1	ENSG00000233832	9375	intergenic	9.15	NA	8	8
rs11819239	10	39085717	A	G	0.4254	NA	NA	NA	0.764579	rs2504142	1	ENSG00000233832	9478	intergenic	8.725	5	8	8
rs11813130	10	39085811	T	C	0.4254	NA	NA	NA	0.764579	rs2504142	1	ENSG00000233832	9572	intergenic	9.782	5	8	8
rs11146733	10	39087985	G	A	0.4254	NA	NA	NA	0.764579	rs2504142	1	ENSG00000233832	11746	intergenic	9.897	5	8	8
rs10781605	10	39089506	T	C	0.4254	NA	NA	NA	0.764579	rs2504142	1	ENSG00000233832	13267	intergenic	9.433	6	8	9
rs7094557	10	39089866	A	G	0.4155	NA	NA	NA	0.729789	rs2504142	1	ENSG00000233832	13627	intergenic	8.716	7	8	9
rs10870411	10	39091742	C	T	0.4254	NA	NA	NA	0.764579	rs2504142	1	ENSG00000233832	15503	intergenic	9.342	7	8	9
rs12784989	10	39092374	T	C	0.4254	NA	NA	NA	0.764579	rs2504142	1	ENSG00000233832	16135	intergenic	9.326	6	8	9
rs12761128	10	39092539	T	C	0.4254	NA	NA	NA	0.764579	rs2504142	1	ENSG00000233832	16300	intergenic	9.162	7	8	9
rs201746458	10	39093087	G	T	0.175	NA	NA	NA	0.719277	rs2472160	1	ENSG00000233832	16848	intergenic	9.291	7	1	9
rs9731483	10	39093699	T	C	0.1759	NA	NA	NA	0.713193	rs2472160	1	ENSG00000233832	17460	intergenic	8.954	7	1	9
rs10870416	10	39094823	C	T	0.4254	NA	NA	NA	0.764579	rs2504142	1	ENSG00000233832	18584	intergenic	9.974	7	5	8
rs11146746	10	39094919	T	C	0.4254	NA	NA	NA	0.764579	rs2504142	1	ENSG00000233832	18680	intergenic	9.779	7	5	8
rs11146747	10	39095078	A	T	0.4254	5.735e-05	0.2844	0.0707	0.764579	rs2504142	1	ENSG00000233832	18839	intergenic	10.43	7	5	8
rs7075522	10	39095274	A	T	0.4254	6.93e-05	0.2854	0.0717	0.764579	rs2504142	1	ENSG00000233832	19035	intergenic	11.1	7	5	8
rs4881580	10	39095497	G	A	0.4274	NA	NA	NA	0.757897	rs2504142	1	ENSG00000233832	19258	intergenic	9.766	7	5	8
rs10870420	10	39097496	A	G	0.4254	6.667e-05	0.2792	0.07	0.764579	rs2504142	1	ENSG00000233832	21257	intergenic	8.828	6	5	8
rs7089520	10	39097912	T	C	0.4254	5.751e-05	-0.2805	0.0697	0.764579	rs2504142	1	ENSG00000233832	21673	intergenic	9.288	7	5	8
rs7904318	10	39098739	T	C	0.4254	NA	NA	NA	0.764579	rs2504142	1	ENSG00000233832	22500	intergenic	8.653	7	8	8
rs144785825	10	39099015	T	TATTCCTTTCCATTCC	0.4215	NA	NA	NA	0.72799	rs2504142	1	ENSG00000233832	22776	intergenic	9.005	NA	8	9
rs10781606	10	39099460	G	C	0.4245	NA	NA	NA	0.760757	rs2504142	1	ENSG00000233832	23221	intergenic	NA	6	8	9
rs199966402	10	39100334	A	C	0.174	NA	NA	NA	0.712242	rs2472160	1	ENSG00000233832	24095	intergenic	10.1	6	8	9
rs559085581	10	39103707	T	C	0.16	NA	NA	NA	0.622541	rs2472160	1	ENSG00000233832	27468	intergenic	8.784	NA	8	9
rs12783164	10	39104733	T	C	0.4254	NA	NA	NA	0.764579	rs2504142	1	ENSG00000233832	28494	intergenic	9.439	6	8	9
rs200139511	10	39104815	G	A	0.16	NA	NA	NA	0.622541	rs2472160	1	ENSG00000233832	28576	intergenic	9.512	7	8	9
rs12769026	10	39104909	A	G	0.4254	NA	NA	NA	0.764579	rs2504142	1	ENSG00000233832	28670	intergenic	9.611	7	8	9
rs2124821	10	39106044	T	C	0.4245	NA	NA	NA	0.759755	rs2504142	1	ENSG00000233832	29805	intergenic	NA	NA	8	9
rs7069011	10	39106910	G	A	0.4254	NA	NA	NA	0.764579	rs2504142	1	ENSG00000233832	30671	intergenic	9.728	7	8	8
rs34370885	10	39107424	T	G	0.4254	NA	NA	NA	0.764579	rs2504142	1	ENSG00000233832	31185	intergenic	8.299	NA	8	9
rs55921281	10	39107628	T	C	0.4274	NA	NA	NA	0.758929	rs2504142	1	ENSG00000233832	31389	intergenic	9.872	7	8	9
rs3970229	10	39107629	T	G	0.4264	NA	NA	NA	0.761731	rs2504142	1	ENSG00000233832	31390	intergenic	8.454	NA	8	9
rs4070174	10	39107651	A	T	0.4274	NA	NA	NA	0.758929	rs2504142	1	ENSG00000233832	31412	intergenic	11.71	7	8	9
rs7074220	10	39108163	A	G	0.4254	5.902e-05	-0.2856	0.0711	0.764579	rs2504142	1	ENSG00000233832	31924	intergenic	10.12	7	8	9
rs7101120	10	39109045	A	G	0.4254	NA	NA	NA	0.757925	rs2504142	1	ENSG00000233832	32806	intergenic	NA	7	8	9
rs182493262	10	39109445	A	G	0.16	NA	NA	NA	0.622541	rs2472160	1	ENSG00000233832	33206	intergenic	9.111	7	8	9
rs7092278	10	39109482	C	T	0.16	NA	NA	NA	0.622541	rs2472160	1	ENSG00000233832	33243	intergenic	8.965	NA	8	9
rs200150680	10	39109536	A	ATTCGAGTCCATTCCC	0.4215	NA	NA	NA	0.757117	rs2504142	1	ENSG00000233832	33297	intergenic	NA	NA	8	9
rs12414073	10	39109636	A	G	0.4274	NA	NA	NA	0.758929	rs2504142	1	ENSG00000233832	33397	intergenic	9.459	7	1	9
rs182520976	10	39109706	C	A	0.16	NA	NA	NA	0.622541	rs2472160	1	ENSG00000233832	33467	intergenic	8.965	7	1	9
rs11817502	10	39109757	T	C	0.4274	NA	NA	NA	0.758929	rs2504142	1	ENSG00000233832	33518	intergenic	9.9	7	1	9
rs11146769	10	39110470	T	C	0.4254	NA	NA	NA	0.764579	rs2504142	1	ENSG00000233832	34231	intergenic	9.923	7	8	9
rs11146770	10	39110601	T	A	0.4274	NA	NA	NA	0.758929	rs2504142	1	ENSG00000233832	34362	intergenic	10.05	7	8	9
rs10870425	10	39110721	A	G	0.4264	NA	NA	NA	0.760724	rs2504142	1	ENSG00000233832	34482	intergenic	9.718	7	8	9
rs11817484	10	39112027	A	G	0.4175	NA	NA	NA	0.727377	rs2504142	1	ENSG00000233832	35788	intergenic	9.86	5	8	9
rs11146771	10	39112451	G	T	0.4274	NA	NA	NA	0.758929	rs2504142	1	ENSG00000233832	36212	intergenic	NA	7	8	9
rs9730853	10	39112841	A	G	0.4254	7.667e-05	-0.2805	0.0709	0.764579	rs2504142	1	ENSG00000233832	36602	intergenic	10.35	7	8	9
rs9730854	10	39112861	G	A	0.4095	NA	NA	NA	0.707548	rs2504142	1	ENSG00000233832	36622	intergenic	10.19	6	8	9
rs11146779	10	39115543	T	C	0.4264	NA	NA	NA	0.761731	rs2504142	1	ENSG00000233832	39304	intergenic	9.706	7	8	8
rs12569710	10	39117286	A	G	0.4294	NA	NA	NA	0.752379	rs2504142	1	ENSG00000233832	41047	intergenic	8.895	7	8	9
rs202171765	10	39117314	T	TG	0.175	NA	NA	NA	0.719277	rs2472160	1	ENSG00000233832	41075	intergenic	NA	NA	8	9
rs373036608	10	39117853	A	G	0.16	NA	NA	NA	0.622541	rs2472160	1	ENSG00000233832	41614	intergenic	9.186	7	8	9
rs11146786	10	39121766	T	G	0.4264	NA	NA	NA	0.760724	rs2504142	1	ENSG00000233832	45527	intergenic	7.339	7	5	8
rs4440961	10	39122216	A	G	0.4264	NA	NA	NA	0.761731	rs2504142	1	ENSG00000233832	45977	intergenic	9.024	7	5	9
rs4440962	10	39122295	A	G	0.4264	NA	NA	NA	0.761731	rs2504142	1	ENSG00000233832	46056	intergenic	9.596	7	5	9
rs35660010	10	39123255	A	G	0.4254	NA	NA	NA	0.764579	rs2504142	1	ENSG00000233832	47016	intergenic	9.541	7	5	9
rs36094068	10	39123263	T	C	0.4254	NA	NA	NA	0.764579	rs2504142	1	ENSG00000233832	47024	intergenic	9.675	7	5	9
rs61304330	10	39123375	CATGGA	C	0.3807	NA	NA	NA	0.617867	rs2504142	1	ENSG00000233832	47136	intergenic	NA	NA	5	9
rs466707	10	39123534	A	G	0.4274	NA	NA	NA	0.751318	rs2504142	1	ENSG00000233832	47295	intergenic	9.488	7	5	9
rs12774587	10	39124596	A	C	0.4254	NA	NA	NA	0.764579	rs2504142	1	ENSG00000233832	48357	intergenic	10.32	7	8	9
rs11146790	10	39124702	T	C	0.4304	NA	NA	NA	0.748599	rs2504142	1	ENSG00000233832	48463	intergenic	9.647	7	8	9
rs34193213	10	39124889	A	G	0.4254	NA	NA	NA	0.764579	rs2504142	1	ENSG00000233832	48650	intergenic	8.935	NA	8	9
rs61827573	10	39125094	A	G	0.4125	NA	NA	NA	0.720294	rs2504142	1	ENSG00000233832	48855	intergenic	8.647	7	8	9
rs7069782	10	39126568	A	C	0.4294	NA	NA	NA	0.753462	rs2504142	1	ENSG00000233832	50329	intergenic	9.667	6	5	9
rs11816532	10	39127033	A	C	0.4245	NA	NA	NA	0.759755	rs2504142	1	ENSG00000233832	50794	intergenic	NA	7	5	9
rs2124825	10	39127471	T	C	0.4264	6.303e-05	0.2874	0.0718	0.761731	rs2504142	1	ENSG00000233832	51232	intergenic	9.548	NA	5	8
rs10870431	10	39127678	G	A	0.4264	NA	NA	NA	0.761731	rs2504142	1	ENSG00000233832	51439	intergenic	9.792	7	5	8
rs12571506	10	39128471	A	G	0.4264	NA	NA	NA	0.761731	rs2504142	1	ENSG00000233832	52232	intergenic	9.998	5	5	8
rs7085927	10	39128497	G	A	0.4254	NA	NA	NA	0.764579	rs2504142	1	ENSG00000233832	52258	intergenic	9.379	5	5	8
rs12357342	10	39129568	A	T	0.4254	7.78e-05	-0.2858	0.0723	0.764579	rs2504142	1	ENSG00000233832	53329	intergenic	9.039	6	5	8
rs4070197	10	39129708	A	G	0.4254	NA	NA	NA	0.764579	rs2504142	1	ENSG00000233832	53469	intergenic	9.693	NA	5	8
rs2501529	10	39130206	T	C	0.4433	NA	NA	NA	0.703059	rs2504142	1	ENSG00000233832	53967	intergenic	9.354	NA	8	8
rs4070194	10	39130426	A	G	0.4245	NA	NA	NA	0.759755	rs2504142	1	ENSG00000233832	54187	intergenic	10.49	NA	8	8
rs12571346	10	39133033	A	G	0.4264	7.214e-05	0.286	0.072	0.761731	rs2504142	1	ENSG00000233832	56794	intergenic	9.307	7	8	8
rs559198687	10	39133971	C	CGAATGGAATG	0.16	NA	NA	NA	0.622541	rs2472160	1	ENSG00000233832	57732	intergenic	NA	NA	8	8
rs10870437	10	39134247	A	G	0.4254	NA	NA	NA	0.764579	rs2504142	1	ENSG00000233832	58008	intergenic	9.083	6	8	9
rs182491771	10	39135072	A	G	0.1551	NA	NA	NA	0.604268	rs2472160	1	ENSG00000233832	58833	intergenic	8.35	6	5	9
rs11146802	10	39135127	A	G	0.4274	NA	NA	NA	0.758929	rs2504142	1	ENSG00000233832	58888	intergenic	8.663	6	5	9
rs201566563	10	39135197	A	G	0.16	NA	NA	NA	0.622541	rs2472160	1	ENSG00000233832	58958	intergenic	8.528	7	5	9
rs11146803	10	39135226	T	C	0.4254	NA	NA	NA	0.764579	rs2504142	1	ENSG00000233832	58987	intergenic	8.886	7	8	9
rs34255422	10	39135801	A	C	0.4264	NA	NA	NA	0.761731	rs2504142	1	ENSG00000233832	59562	intergenic	NA	NA	8	9
rs36111799	10	39136170	C	T	0.4264	NA	NA	NA	0.768439	rs2504142	1	ENSG00000233832	59931	intergenic	9.213	NA	8	9
rs35807633	10	39136247	C	G	0.4264	NA	NA	NA	0.761731	rs2504142	1	ENSG00000233832	60008	intergenic	7.268	7	8	9
rs35629328	10	39136342	T	G	0.4254	NA	NA	NA	0.764579	rs2504142	1	ENSG00000233832	60103	intergenic	8.565	7	8	9
rs56201020	10	39136691	A	G	0.4284	NA	NA	NA	0.756173	rs2504142	1	ENSG00000233832	60452	intergenic	9.72	7	8	8
rs4587664	10	39137440	A	G	0.4245	NA	NA	NA	0.768448	rs2504142	1	ENSG00000233832	61201	intergenic	9.775	4	5	8
rs192671479	10	39137894	T	C	0.161	NA	NA	NA	0.616511	rs2472160	1	ENSG00000233832	61655	intergenic	9.004	5	5	8
rs200242000	10	39138415	T	C	0.163	NA	NA	NA	0.60465	rs2472160	1	ENSG00000233832	62176	intergenic	9.217	5	5	8
rs4469808	10	39141276	G	T	0.4254	NA	NA	NA	0.765579	rs2504142	1	ENSG00000233832	65037	intergenic	10.88	5	5	8
rs4620650	10	39141922	A	G	0.4274	NA	NA	NA	0.757897	rs2504142	1	ENSG00000233832	65683	intergenic	9.279	7	5	8
rs4881594	10	39144210	A	G	0.4254	NA	NA	NA	0.765579	rs2504142	1	ENSG00000233832	67971	intergenic	10.39	6	5	8
rs4593937	10	39145159	A	G	0.4264	NA	NA	NA	0.761731	rs2504142	1	ENSG00000233832	68920	intergenic	10.07	5	5	8
rs200485340	10	39146089	G	C	0.4225	NA	NA	NA	0.768524	rs2504142	1	ENSG00000233832	69850	intergenic	8.981	7	1	8
rs11146820	10	39146102	A	C	0.4274	NA	NA	NA	0.752398	rs2504142	1	ENSG00000233832	69863	intergenic	9.576	7	1	8
rs4489665	10	39147147	T	C	0.4235	NA	NA	NA	0.756974	rs2504142	1	ENSG00000233832	70908	intergenic	10	5	1	8
rs368557809	10	39147818	T	C	0.159	NA	NA	NA	0.617218	rs2472160	1	ENSG00000233832	71579	intergenic	9.045	7	5	9
rs185712696	10	39147923	G	T	0.175	NA	NA	NA	0.719277	rs2472160	1	ENSG00000233832	71684	intergenic	10.42	6	5	9
rs7067674	10	39148707	C	T	0.4245	NA	NA	NA	0.760757	rs2504142	1	ENSG00000233832	72468	intergenic	9.534	7	5	8
rs11146837	10	39149874	T	C	0.4264	NA	NA	NA	0.760724	rs2504142	1	ENSG00000233832	73635	intergenic	9.731	7	8	8
rs11146838	10	39149977	T	A	0.4245	NA	NA	NA	0.768448	rs2504142	1	ENSG00000233832	73738	intergenic	9.711	7	8	8
rs36157556	10	39150171	T	G	0.4225	NA	NA	NA	0.766564	rs2504142	1	ENSG00000233832	73932	intergenic	NA	7	8	8
rs62645554	10	39150296	C	A	0.4245	NA	NA	NA	0.768448	rs2504142	1	ENSG00000233832	74057	intergenic	8.626	7	8	8
rs55928998	10	39150486	A	C	0.4254	NA	NA	NA	0.765579	rs2504142	1	ENSG00000233832	74247	intergenic	9.798	7	8	8
rs12412218	10	39151012	G	C	0.4245	NA	NA	NA	0.768448	rs2504142	1	ENSG00000233832	74773	intergenic	9.6	7	8	8
rs62645557	10	39151143	G	T	0.4016	NA	NA	NA	0.713032	rs2504142	1	ENSG00000233832	74904	intergenic	10.19	7	8	8
rs61829014	10	39152346	T	G	0.4254	NA	NA	NA	0.765579	rs2504142	1	ENSG00000233832	76107	intergenic	7.647	NA	8	8
rs61829015	10	39152417	T	C	0.4245	3.754e-05	-0.3	0.0728	0.768448	rs2504142	1	ENSG00000233832	76178	intergenic	9.772	6	8	8
rs528322767	10	39152577	C	G	0.16	NA	NA	NA	0.622541	rs2472160	1	ENSG00000233832	76338	intergenic	6.409	NA	8	8
rs35236152	10	39152609	A	C	0.4245	NA	NA	NA	0.768448	rs2504142	1	ENSG00000233832	76370	intergenic	9.791	NA	8	8
rs4427492	10	39153350	A	T	0.4245	NA	NA	NA	0.768448	rs2504142	1	ENSG00000233832	77111	intergenic	11.65	6	8	8
rs11146845	10	39153650	T	G	0.4245	NA	NA	NA	0.768448	rs2504142	1	ENSG00000233832	77411	intergenic	7.782	7	8	8
rs11146846	10	39153806	A	G	0.4245	NA	NA	NA	0.768448	rs2504142	1	ENSG00000233832	77567	intergenic	9.156	5	8	8
rs12571049	10	39154043	T	C	0.4264	NA	NA	NA	0.761731	rs2504142	1	ENSG00000233832	77804	intergenic	9.383	7	8	8
rs12570205	10	39154220	A	G	0.4245	NA	NA	NA	0.768448	rs2504142	1	ENSG00000233832	77981	intergenic	9.331	7	8	8
