# Supplementary material for: A meta-analysis of genome-wide association studies of epigenetic age acceleration
Source: PLoS Genet. 2019 Nov 18;15(11):e1008104. doi: 10.1371/journal.pgen.1008104 (PMC6886870; doi:10.1371/journal.pgen.1008104)
Supplement: S12 Table — (XLSX) [file pgen.1008104.s013.xlsx]

## Sheet: S12 Table
S12 Table: Expression quantitative trait loci identified by analysis of independent significant variants for Horvath-EAA and the significance of their expression in the specified tissues.
Gene refers to the location of the given SNP, where the variant is located within or within +/- 10kb of the gene
aThe variant is not within the gene body, but is located within +/- 10kb of the gene
Phenotype	Chromosome	SNP	Gene	eQTL gene	Tissue	eQTL P-value	FDR
Horvath-EAA	1	rs1011267	C1orf112	C1orf112	Brain_Cerebellum	2.44959e-06	5.62084e-16
				METTL18	Muscle_Skeletal	2.56076e-05	9.00985e-32
				METTL18	Esophagus_Muscularis	3.96184e-07	1.31731e-47
				SCYL3	Nerve_Tibial	2.36755e-05	6.85427e-08
				SELL	Nerve_Tibial	8.53061e-08	3.61851e-11
	3	rs388649	PIK3CB	CEP70	Thyroid	1.49545e-06	2.09689e-08
				CEP70	Esophagus_Mucosa	2.34872e-05	5.26195e-07
				ESYT3	Skin_Sun_Exposed_Lower_leg	1.56426e-07	2.65317e-11
				FAIM	Brain_Nucleus_accumbens_basal_ganglia	1.03573e-05	0.00285144
				FAIM	Skin_Not_Sun_Exposed_Suprapubic	3.24512e-10	6.77174e-08
				FAIM	Skin_Sun_Exposed_Lower_leg	3.99188e-12	7.62584e-11
				FAIM	Esophagus_Muscularis	2.13477e-05	0.000408728
				FAIM	Brain_Frontal_Cortex_BA9	2.04432e-05	0.00124201
				FAIM	Esophagus_Mucosa	1.57545e-13	3.88599e-14
				FAIM	Muscle_Skeletal	4.5085e-13	7.90071e-16
				FAIM	Pancreas	5.05006e-06	2.28517e-06
				PIK3CB	Cells_Transformed_fibroblasts	4.2231e-07	1.30504e-05
				PIK3CB	Esophagus_Mucosa	5.73957e-09	9.87067e-07
				PIK3CB	Adipose_Subcutaneous	4.34427e-05	0.000622615
	6	rs7744541		TPMT	Esophagus_Muscularis	1.04904e-05	9.62897e-08
	6	rs76244256	TPMT	NHLRC1	Esophagus_Muscularis	1.47855e-05	0.000645228
				NHLRC1	Artery_Tibial	7.6978e-07	6.74074e-05
				NHLRC1	Thyroid	8.1466e-08	8.31468e-06
				NHLRC1	Esophagus_Mucosa	2.28842e-06	3.41637e-05
				NHLRC1	Skin_Sun_Exposed_Lower_leg	3.86528e-16	6.06029e-14
				NHLRC1	Skin_Not_Sun_Exposed_Suprapubic	5.32012e-13	1.03757e-10
				TPMT	Muscle_Skeletal	4.33151e-08	6.16935e-06
	6	rs4712953	SCGN	SCGN	Thyroid	4.26022e-10	1.59959e-08
				SCGN	Adipose_Visceral_Omentum	3.07771e-30	9.66835e-27
				SCGN	Breast_Mammary_Tissue	2.38269e-05	0.00110024
				SCGN	Esophagus_Muscularis	1.75117e-09	1.28171e-06
				SCGN	Adipose_Subcutaneous	4.23623e-21	5.49533e-17
				SCGN	Heart_Left_Ventricle	8.1799e-09	3.68e-05
				SCGN	Pancreas	5.07232e-06	6.87907e-14
	12	rs10778517	RP11-412D9.4/TMEM263a	C12orf23	Artery_Tibial	7.42378e-14	1.14615e-16
				C12orf23	Nerve_Tibial	1.87351e-08	2.0437e-07
				C12orf23	Skin_Sun_Exposed_Lower_leg	6.67238e-07	9.08136e-05
	17	rs62078811	STXBP4	COX11	Brain_Caudate_basal_ganglia	9.67448e-07	3.80309e-08
				COX11	Artery_Tibial	1.88324e-07	1.05161e-17
				COX11	Nerve_Tibial	1.58288e-08	1.29128e-22
				COX11	Adipose_Subcutaneous	1.76933e-08	4.36074e-26
				COX11	Cells_Transformed_fibroblasts	2.17481e-07	1.32274e-25
